# Supplementary material for: Improved model for the refractive index: application to potential components of ambient aerosol
Source: Royal Society of Chemistry journal article supplement (doi:10.1039/c8cp02701c), 2018-01-01
Supplement: c8cp02701c3.xlsx [file c8cp02701c3.xlsx]

## Sheet: Table S1
Table S1. Experimental and fitted values of the refractive index for the GF training set.
Exp. = Experimental values from TCI catalog
GF = fitted GF values
CASRN	Exp.	GF
631-71-0	1.528	1.5122
591-87-7	1.404	1.414
140-11-4	1.5025	1.5121
123-86-4	1.3945	1.4043
540-88-5	1.386	1.4047
622-45-7	1.4405	1.4475
141-78-6	1.3715	1.3835
142-92-7	1.4085	1.4169
108-22-5	1.4005	1.4087
143-13-5	1.423	1.4285
122-79-2	1.502	1.5181
108-05-4	1.3955	1.4045
67-64-1	1.359	1.3631
1830-54-2	1.4435	1.4318
75-05-8	1.3445	1.3425
142-26-7	1.4735	1.4505
1888-91-1	1.4885	1.4942
77-89-4	1.4385	1.4513
762-42-5	1.447	1.4501
618-42-8	1.4805	1.4705
350-03-8	1.534	1.5196
79-10-7	1.4205	1.4358
140-88-5	1.4055	1.414
96-33-3	1.4025	1.4045
141-28-6	1.4275	1.4326
27178-16-1	1.453	1.4504
627-93-0	1.4285	1.4258
111-50-2	1.472	1.4635
109-75-1	1.4055	1.4131
2049-80-1	1.4305	1.4421
1745-81-9	1.545	1.5565
592-88-1	1.49	1.4936
551-93-9	1.6155	1.5611
137-07-5	1.6425	1.6415
111-41-1	1.4855	1.4756
140-31-8	1.498	1.5142
151-18-8	1.438	1.4301
88-17-5	1.4815	1.4796
156-87-6	1.46	1.4403
24317-94-0	1.4305	1.434
538-68-1	1.488	1.4966
1741-83-9	1.451	1.4553
463-04-7	1.3895	1.3995
122-98-5	1.5785	1.5591
123-11-5	1.573	1.5265
536-90-3	1.5805	1.5494
100-66-3	1.5175	1.5094
87-25-2	1.564	1.5434
3054-95-3	1.4015	1.4126
105-45-3	1.418	1.4087
6938-94-9	1.4235	1.4339
3850-30-4	1.4125	1.4227
122-46-3	1.5005	1.5153
533-18-6	1.4995	1.5153
872-10-6	1.4555	1.4591
96-20-8	1.4525	1.4405
140-67-0	1.522	1.517
5736-91-4	1.5335	1.5058
2094-73-7	1.489	1.4891
88-15-3	1.5665	1.5407
762-72-1	1.407	1.4079
25584-83-2	1.4455	1.4471
106-63-8	1.414	1.4235
696-57-1	1.459	1.4741
7307-55-3	1.439	1.4416
870-23-5	1.475	1.4736
141-72-0	1.4125	1.421
591-60-6	1.427	1.4264
6624-84-6	1.429	1.4302
13562-81-7	1.4265	1.4279
13562-76-0	1.4225	1.424
1779-60-8	1.422	1.4218
13552-21-1	1.4505	1.4405
27846-49-7	1.4155	1.4235
25560-00-3	1.475	1.4817
122-40-7	1.5575	1.5175
3069-29-2	1.4485	1.4426
140-03-4	1.456	1.4576
874-23-7	1.51	1.4611
104-21-2	1.5135	1.5063
3312-60-5	1.4815	1.485
112-66-3	1.4325	1.4358
112-06-1	1.4135	1.4215
13562-84-0	1.434	1.4333
42598-96-9	1.439	1.4359
18146-00-4	1.396	1.408
1421-89-2	1.417	1.4259
94-30-4	1.5245	1.5063
6192-44-5	1.508	1.5035
6168-72-5	1.45	1.4351
121-50-6	1.498	1.5035
5856-63-3	1.4515	1.4405
3232-39-1	1.4825	1.4835
1193-79-9	1.5125	1.4723
22374-89-6	1.5135	1.5226
3840-18-4	1.605	1.612
932-16-1	1.5415	1.5054
27578-60-5	1.473	1.4886
557-31-3	1.3875	1.4001
5063-03-06	1.4835	1.494
3295-97-4	1.428	1.4317
445-03-4	1.5075	1.5035
27817-67-0	1.4675	1.4735
624-41-9	1.4015	1.4087
7789-99-3	1.4075	1.4145
5906-35-4	1.485	1.5071
50541-93-0	1.543	1.5637
50816-18-7	1.4365	1.4414
63493-28-7	1.4025	1.4161
2623-23-6	1.446	1.4476
115445-29-9	1.4955	1.4775
616-24-0	1.405	1.4161
10152-76-8	1.47	1.4755
40635-66-3	1.4295	1.4404
54060-30-9	1.616	1.5931
5953-76-4	1.4325	1.4262
10482-55-0	1.438	1.4383
2160-89-6	1.3195	1.3299
40853-55-2	1.427	1.426
132664-85-8	1.5405	1.5389
3731-51-9	1.546	1.5502
116183-82-5	1.488	1.4856
114715-39-8	1.544	1.5633
5754-35-8	1.4525	1.4482
94487-74-8	1.4735	1.4661
5036-48-6	1.519	1.5158
15848-22-3	1.4605	1.4552
2114-42-3	1.4495	1.4562
3066-71-5	1.459	1.4649
38205-60-6	1.543	1.5265
122-72-5	1.496	1.5035
2439-35-2	1.437	1.4452
2499-95-8	1.428	1.4341
24295-03-2	1.5475	1.5368
4985-85-7	1.4975	1.4914
19248-13-6	1.5565	1.5339
53485-07-7	1.565	1.5378
36394-75-9	1.421	1.4335
22795-99-9	1.4655	1.4751
34698-41-4	1.5615	1.58
42185-03-5	1.415	1.4191
3245-23-6	1.499	1.5102
27905-45-9	1.336	1.3183
59983-39-0	1.464	1.4729
72748-99-3	1.464	1.4729
22795-97-7	1.4655	1.4751
108-84-9	1.401	1.4122
19060-15-2	1.43	1.4215
112-17-4	1.4265	1.4313
57260-73-8	1.4565	1.4598
51644-96-3	1.4595	1.4615
375855-08-6	1.415	1.4213
613-70-7	1.514	1.5107
13038-22-7	1.434	1.4393
2478-10-06	1.453	1.4495
32161-06-1	1.503	1.4836
3121-61-7	1.4265	1.4205
14936-66-4	1.419	1.4266
405-51-6	1.4795	1.4986
5296-64-0	1.576	1.5771
1072-33-9	1.4345	1.4376
3061-65-2	1.425	1.431
3739-64-8	1.406	1.4154
37818-93-2	1.5235	1.5218
13831-31-7	1.4255	1.4321
2551-83-9	1.4045	1.4082
39885-50-2	1.5015	1.5035
86945-25-7	1.5335	1.5485
10500-11-5	1.4105	1.4235
63600-35-1	1.537	1.529
18583-89-6	1.5725	1.5467
57414-85-4	1.5565	1.5384
44565-27-7	1.4615	1.4444
22502-03-0	1.4335	1.4214
4369-14-6	1.428	1.4276
14036-06-7	1.4	1.4089
2917-65-9	1.408	1.4046
4169-19-1	1.579	1.568
919-94-8	1.391	1.4014
15057-11-1	1.4125	1.4113
627-91-8	1.441	1.4442
22948-02-3	1.663	1.6415
3279-27-4	1.523	1.5194
5089-72-5	1.442	1.4463
2179-58-0	1.536	1.5454
87-63-8	1.578	1.5785
39741-41-8	1.531	1.5008
1118-84-9	1.441	1.4376
1052236-86-8	1.495	1.4992
2706-56-1	1.536	1.5384
32974-92-8	1.514	1.5067
865350-17-0	1.459	1.4445
142-19-8	1.428	1.4369
4383-22-6	1.523	1.5362
72824-04-5	1.427	1.4324
123-68-2	1.425	1.4341
69500-64-7	1.481	1.4827
91702-98-6	1.552	1.5677
56966-48-4	1.626	1.6445
94-66-6	1.469	1.4673
31121-11-6	1.573	1.5482
1904-31-0	1.544	1.5394
857831-26-6	1.498	1.4873
172531-37-2	1.471	1.4495
74472-22-3	1.438	1.4222
76397-53-0	1.66	1.6371
184637-48-7	1.473	1.4868
5339-85-5	1.588	1.5753
271-58-9	1.585	1.5632
3572-06-03	1.509	1.5121
4203-49-0	1.445	1.451
32343-73-0	1.481	1.4619
2854-16-2	1.446	1.4449
2489-86-3	1.611	1.5891
119020-01-8	1.469	1.4795
16486-68-3	1.419	1.4388
23099-21-0	1.492	1.4925
130290-79-8	1.465	1.464
911482-75-2	1.438	1.4363
1190-93-8	1.505	1.5171
7493-72-3	1.434	1.4414
88675-24-5	1.459	1.4473
259537-92-3	1.47	1.4795
869718-80-9	1.461	1.4401
79583-98-5	1.466	1.4484
334521-23-2	1.446	1.4351
6777-00-0	1.44	1.429
162167-97-7	1.473	1.4852
38939-83-2	1.422	1.4335
71-43-2	1.5005	1.5195
515-46-8	1.51	1.5182
98-09-9	1.552	1.5571
120-51-4	1.5695	1.5837
136-60-7	1.497	1.5035
939-55-9	1.5285	1.5281
39252-69-2	1.5775	1.5856
120-50-3	1.494	1.5007
93-58-3	1.5165	1.5181
100-47-0	1.529	1.5469
94-02-0	1.5305	1.5138
98-88-4	1.5525	1.553
91-00-9	1.5965	1.6101
6737-11-07	1.4035	1.4178
688-71-1	1.3945	1.4033
1087-97-4	1.5085	1.5063
107-81-3	1.441	1.4376
13360-63-9	1.4045	1.4181
588-67-0	1.4865	1.4934
57045-82-6	1.4345	1.4412
2696-84-6	1.544	1.5362
133-08-4	1.423	1.4333
31252-42-3	1.5375	1.5456
7521-80-4	1.436	1.4474
100-46-9	1.5435	1.5534
100-44-7	1.5385	1.5365
5292-53-5	1.5365	1.5168
538-86-3	1.505	1.5038
101-82-6	1.579	1.5898
108-86-1	1.56	1.5831
111-44-4	1.4575	1.4327
112-36-7	1.412	1.4078
143-24-8	1.433	1.4166
10416-59-8	1.416	1.4175
2665-12-05	1.557	1.5753
5419-55-6	1.3765	1.3981
5655-61-8	1.4635	1.4664
2142-63-4	1.576	1.5721
598-21-0	1.5475	1.5241
591-19-5	1.6255	1.6255
578-57-4	1.574	1.562
3132-99-8	1.5935	1.5928
1711-09-7	1.595	1.6007
109-65-9	1.44	1.4369
4784-77-4	1.48	1.4728
5332-06-09	1.4775	1.4615
694-80-4	1.5815	1.6028
107-04-0	1.49	1.4627
108-85-0	1.496	1.4856
143-15-7	1.459	1.4537
540-51-2	1.49	1.4684
103-63-9	1.557	1.5538
18908-66-2	1.4555	1.446
112-82-3	1.462	1.4566
616-05-7	1.471	1.4768
20769-85-1	1.5095	1.5076
78-77-3	1.4365	1.4331
90-11-9	1.6575	1.6488
2623-82-7	1.4695	1.4749
95-56-7	1.588	1.6265
106-94-5	1.4345	1.4315
19686-73-8	1.481	1.4631
106-95-6	1.468	1.4584
535-11-5	1.446	1.4487
3395-91-3	1.4585	1.4498
109-04-6	1.5705	1.5814
103-64-0	1.6065	1.5907
591-17-3	1.553	1.5705
392-83-6	1.4825	1.4957
584-93-0	1.4695	1.4781
107-88-0	1.44	1.43
513-85-9	1.4345	1.4256
109-79-5	1.443	1.4485
96-29-7	1.4425	1.4263
625-38-7	1.423	1.442
6117-91-5	1.429	1.4379
111-76-2	1.419	1.4169
112-07-2	1.414	1.4167
1540-29-0	1.43	1.4312
109-73-9	1.402	1.4116
75-64-9	1.377	1.412
764-01-2	1.4535	1.4497
135-98-8	1.49	1.4966
3622-84-2	1.5245	1.5274
106-88-7	1.384	1.3896
142-96-1	1.3995	1.4076
102-79-4	1.4625	1.4644
89-72-5	1.5235	1.5223
85-70-1	1.4905	1.4987
544-40-1	1.4525	1.4576
98-51-1	1.491	1.4989
123-72-8	1.3795	1.3879
107-92-6	1.3985	1.4162
103-37-7	1.492	1.5035
1551-44-6	1.442	1.4512
106-27-4	1.4105	1.4193
638-11-9	1.394	1.4087
105-66-8	1.3995	1.4113
106-31-0	1.4135	1.4264
109-74-0	1.384	1.3889
141-75-3	1.412	1.4181
927-74-2	1.441	1.4364
584-03-2	1.4385	1.43
107-47-1	1.451	1.4575
110-64-5	1.4785	1.4775
1678-93-9	1.441	1.4433
1070-83-3	1.411	1.4299
1191-08-8	1.5305	1.5162
870-63-3	1.49	1.467
5131-66-8	1.418	1.4198
13750-62-4	1.5645	1.5741
3319-31-1	1.4855	1.4826
1072-85-1	1.534	1.5555
4432-77-3	1.398	1.4183
3068-88-0	1.411	1.4074
5331-37-3	1.479	1.4793
5162-44-7	1.4635	1.4598
14898-79-4	1.397	1.3954
6334-96-9	1.459	1.4448
693-58-3	1.4545	1.4501
765-09-3	1.46	1.4545
3817-11-06	1.472	1.4536
1521-51-3	1.5295	1.5208
4543-95-7	1.452	1.4474
2032-35-1	1.4385	1.4386
5396-38-3	1.503	1.4957
2425-79-8	1.453	1.4435
1074-92-6	1.507	1.4989
271-95-4	1.5625	1.5632
95241-36-4	1.4915	1.4949
3445-84-9	1.484	1.4706
1606-85-5	1.485	1.4753
1634-04-4	1.3695	1.3832
583-70-0	1.551	1.561
2969-81-5	1.4565	1.4538
2028-63-9	1.426	1.4311
89-92-9	1.576	1.5574
137-43-9	1.488	1.4751
620-13-3	1.566	1.5574
5332-24-1	1.6645	1.6505
22499-12-3	1.551	1.5479
2859-78-1	1.573	1.5475
14282-76-9	1.573	1.5918
3612-20-2	1.5405	1.5555
25870-62-6	1.5025	1.5035
769-78-8	1.528	1.5333
41519-23-7	1.43	1.4413
25152-85-6	1.509	1.5182
54925-64-3	1.481	1.4645
590-17-0	1.4785	1.4588
1189-08-8	1.4525	1.4511
558-17-8	1.4915	1.4907
53398-83-7	1.431	1.4435
90-99-3	1.5965	1.5964
5400-88-4	1.4645	1.4645
513-48-4	1.4995	1.4869
2049-96-9	1.495	1.5003
7252-83-7	1.4455	1.4307
917-92-0	1.375	1.4169
344-04-7	1.4495	1.4687
104-63-2	1.543	1.5482
4701-17-1	1.639	1.6168
77377-52-7	1.4025	1.4015
614-31-3	1.6195	1.6208
24621-61-2	1.44	1.43
399-94-0	1.5085	1.5307
2367-76-2	1.484	1.5081
15987-00-5	1.494	1.4913
3378-72-1	1.497	1.5123
539-32-2	1.493	1.4956
1125-88-8	1.493	1.4925
7300-34-7	1.4615	1.4576
685-87-0	1.4525	1.4607
102-97-6	1.502	1.5143
58479-61-1	1.567	1.5461
2635-13-4	1.5835	1.6157
15121-89-8	1.544	1.533
3377-86-4	1.445	1.4411
637-59-2	1.5455	1.5441
431-35-6	1.375	1.3772
16499-88-0	1.426	1.4294
3470-98-2	1.465	1.461
32783-20-3	1.513	1.5102
2208-05-01	1.508	1.5179
557-93-7	1.444	1.4515
39149-80-9	1.4395	1.4524
576-23-8	1.56	1.561
15852-73-0	1.584	1.6028
3033-62-3	1.4295	1.4402
18457-04-0	1.417	1.4228
328-74-5	1.434	1.4287
13657-16-4	1.534	1.5453
6940-78-9	1.487	1.464
557-35-7	1.45	1.446
124-21-0	1.4215	1.4266
111-95-5	1.42	1.4175
59313-58-5	1.519	1.5122
802-93-7	1.388	1.3881
433-19-2	1.379	1.3981
13294-71-8	1.4605	1.467
68322-84-9	1.4595	1.4784
14495-51-3	1.574	1.5886
929-59-9	1.461	1.4533
17922-24-6	1.538	1.5428
4741-99-5	1.494	1.4956
2998-56-3	1.508	1.4881
5414-21-1	1.4785	1.4623
34722-01-5	1.5025	1.5107
3196-15-4	1.452	1.4487
25542-62-5	1.459	1.4563
5292-43-3	1.445	1.4537
6163-64-0	1.4405	1.4537
17715-69-4	1.573	1.5475
19522-69-1	1.4425	1.4493
5340-78-3	1.403	1.4171
5798-75-4	1.5475	1.5538
38235-77-7	1.563	1.5782
6770-38-3	1.503	1.4955
101385-90-4	1.5485	1.5616
765-58-2	1.5705	1.5918
637-92-3	1.3755	1.3934
2469-55-8	1.45	1.4452
96568-35-3	1.533	1.5466
115445-21-1	1.525	1.54
18291-80-0	1.442	1.4418
376591-05-8	1.524	1.54
169749-99-9	1.5325	1.5466
57042-08-7	1.4435	1.4508
775-15-5	1.548	1.5616
59578-63-1	1.533	1.5327
23703-22-2	1.522	1.5271
71209-71-7	1.5175	1.5024
106418-67-1	1.51	1.512
7538-42-3	1.474	1.4763
100779-91-7	1.535	1.5331
5896-17-3	1.6	1.5896
2845-62-7	1.5355	1.5599
6272-38-4	1.59	1.609
401-55-8	1.427	1.4245
51437-00-4	1.5295	1.5472
36839-55-1	1.57	1.5482
81790-10-5	1.4635	1.4463
1559-88-2	1.4695	1.4875
31805-84-2	1.509	1.5016
88738-78-7	1.3685	1.3612
3972-65-4	1.5335	1.5386
50816-19-8	1.48	1.4677
1576-84-7	1.411	1.421
401-95-6	1.4215	1.4199
108149-60-6	1.443	1.4637
32644-15-8	1.475	1.4821
939-97-9	1.527	1.5128
2417-90-5	1.48	1.4604
138526-69-9	1.482	1.5081
17082-61-0	1.4345	1.4342
407-14-7	1.461	1.4918
27060-75-9	1.56	1.5539
556-96-7	1.5495	1.561
1675-54-3	1.5735	1.5567
1514-82-5	1.3545	1.3759
3279-07-0	1.5515	1.5431
17435-72-2	1.4785	1.4671
4286-55-9	1.483	1.4678
22737-37-7	1.413	1.4136
452-08-4	1.549	1.5403
7665-72-7	1.417	1.4178
10160-24-4	1.482	1.4678
770-09-2	1.493	1.4817
6974-77-2	1.482	1.4603
60811-18-9	1.5555	1.5768
328-73-4	1.4635	1.4798
1422-53-3	1.5285	1.5472
1585-07-5	1.5435	1.5574
588-93-2	1.5355	1.5472
18243-41-9	1.4455	1.4291
3430-17-9	1.5685	1.5683
87630-36-2	1.517	1.4883
36255-44-4	1.448	1.4351
41492-05-1	1.53	1.5392
27361-16-6	1.488	1.492
452-74-4	1.53	1.5472
93102-05-7	1.4915	1.4864
30071-93-3	1.4225	1.4209
5444-75-7	1.491	1.4915
2039-82-9	1.594	1.5826
2873-18-9	1.595	1.6286
785-56-8	1.433	1.4355
37891-79-5	1.508	1.4864
620-79-1	1.4995	1.5038
40032-73-3	1.5995	1.6286
19614-16-5	1.6335	1.6243
147460-41-1	1.5525	1.5958
2403-22-7	1.5005	1.5127
586-61-8	1.536	1.5436
4509-90-4	1.492	1.477
15486-96-1	1.492	1.4802
116632-39-4	1.6495	1.6543
364-73-8	1.5765	1.5777
4837-01-08	1.6075	1.6026
5337-36-0	1.426	1.4292
17789-14-9	1.563	1.5735
2930-05-04	1.5175	1.5176
4926-28-7	1.5635	1.5683
515-69-5	1.4955	1.4907
87227-41-6	1.48	1.468
14347-83-2	1.494	1.5061
110556-33-7	1.455	1.4487
56552-80-8	1.533	1.5373
3282-56-2	1.5335	1.5189
22037-28-1	1.497	1.5264
29182-42-1	1.579	1.576
3355-28-0	1.508	1.4854
14618-80-5	1.517	1.5176
19117-31-8	1.546	1.5601
61715-75-1	1.547	1.5378
24358-62-1	1.568	1.582
18995-35-2	1.506	1.5136
2114-39-8	1.545	1.5405
17151-09-6	1.513	1.4708
4897-84-1	1.461	1.452
420-90-6	1.38	1.4042
2051-97-0	1.568	1.5845
4316-42-1	1.48	1.4798
6320-02-01	1.636	1.648
2164-34-3	1.575	1.5856
2039-88-5	1.591	1.5826
100-51-6	1.5405	1.5502
258332-57-9	1.457	1.4631
130783-02-7	1.442	1.4517
1423-60-5	1.406	1.4151
2679-87-0	1.3775	1.3903
4466-24-4	1.445	1.4562
4237-40-5	1.532	1.5164
328-93-8	1.433	1.4287
320-88-7	1.427	1.4249
56970-78-6	1.477	1.4798
25109-28-8	1.559	1.565
17229-17-3	1.52	1.5162
142851-03-4	1.458	1.471
201593-90-0	1.46	1.4508
40161-55-5	1.465	1.4784
76505-71-0	1.475	1.4814
27784-76-5	1.431	1.4352
172656-11-0	1.4695	1.465
54314-84-0	1.532	1.5316
54247-27-7	1.52	1.5171
85510-82-3	1.561	1.5629
62871-09-4	1.467	1.4635
84750-93-6	1.544	1.5396
75178-90-4	1.458	1.4574
29955-12-2	1.4675	1.4318
30379-55-6	1.527	1.5373
86990-91-2	1.526	1.5305
81096-93-7	1.528	1.5305
110993-40-3	1.517	1.5131
2914-69-4	1.426	1.4311
13250-12-9	1.393	1.4077
147081-49-0	1.471	1.4806
2114-00-3	1.572	1.5531
1070-70-8	1.456	1.4567
13048-34-5	1.4595	1.4603
1073234-31-7	1.559	1.5631
142808-15-9	1.462	1.4784
24168-70-5	1.493	1.4853
133437-08-8	1.524	1.5222
133739-70-5	1.484	1.5081
71101-89-8	1.466	1.4693
682-09-7	1.459	1.4583
10531-16-5	1.543	1.5326
501-53-1	1.518	1.5356
22002-45-5	1.565	1.5539
33863-76-2	1.548	1.5768
656-57-5	1.482	1.4602
349-03-1	1.511	1.5184
20651-75-6	1.532	1.5194
202865-85-8	1.651	1.6543
130723-13-6	1.455	1.4784
205371-26-2	1.482	1.5202
60633-25-2	1.587	1.5799
15499-27-1	1.508	1.5181
22065-85-6	1.5365	1.5479
69342-47-8	1.517	1.5219
18599-22-9	1.355	1.376
952057-61-3	1.523	1.5292
698-00-0	1.575	1.5694
2695-48-9	1.468	1.4628
40473-07-2	1.558	1.5596
22282-99-1	1.551	1.5683
5931-17-9	1.451	1.4414
80443-63-6	1.517	1.5199
157528-56-8	1.536	1.5508
60272-71-1	1.576	1.5621
4437-85-8	1.428	1.4236
5854-78-4	1.434	1.4449
110407-59-5	1.552	1.5768
6297-41-2	1.414	1.4233
344-65-0	1.508	1.517
29421-92-9	1.574	1.5918
144584-67-8	1.464	1.4784
32741-11-0	1.489	1.4907
10526-15-5	1.466	1.4674
87100-28-5	1.488	1.5023
3913-02-08	1.442	1.4374
4720-29-0	1.538	1.5396
17878-47-6	1.531	1.5193
85609-03-6	1.595	1.5939
36865-41-5	1.447	1.4355
69249-61-2	1.529	1.5368
1074-16-4	1.577	1.5853
10558-25-5	1.49	1.5125
68105-93-1	1.481	1.465
17887-80-8	1.406	1.4108
33729-92-9	1.559	1.5377
7766-50-9	1.468	1.4638
864830-16-0	1.53	1.5441
6627-89-0	1.48	1.4999
775-16-6	1.537	1.5543
72648-80-7	1.454	1.4628
39969-56-7	1.542	1.5416
40273-45-8	1.546	1.5524
27298-97-1	1.568	1.582
32431-65-5	1.549	1.5779
125995-13-3	1.454	1.4675
32864-38-3	1.416	1.4296
3430-16-8	1.562	1.5683
13472-59-8	1.566	1.5596
349-59-7	1.426	1.4245
143888-85-1	1.618	1.6239
33070-32-5	1.4985	1.556
175278-09-8	1.513	1.5238
35822-58-3	1.514	1.5219
14036-55-6	1.413	1.4307
75148-49-1	1.512	1.5219
30608-62-9	1.3835	1.3896
21906-31-0	1.559	1.5601
56602-77-8	1.511	1.5125
694-87-1	1.542	1.5567
450-88-4	1.546	1.5403
1121-03-5	1.4555	1.4413
186550-13-0	1.471	1.4806
41556-26-7	1.483	1.4843
58971-11-2	1.576	1.5863
86953-79-9	1.45	1.4596
393-82-8	1.433	1.4355
210705-84-3	1.529	1.5368
25834-93-9	1.466	1.4621
147539-41-1	1.4685	1.4796
28957-72-4	1.552	1.567
16128-68-0	1.523	1.5119
5610-49-1	1.466	1.4786
524713-66-4	1.587	1.5615
22118-12-3	1.476	1.4744
123237-62-7	1.431	1.4234
40348-66-1	1.438	1.43
16068-37-4	1.411	1.4234
18791-78-1	1.633	1.6168
10340-00-8	1.492	1.4919
38409-59-5	1.522	1.5271
262587-05-3	1.502	1.5097
59664-42-5	1.422	1.4199
124655-09-0	1.452	1.4642
114214-69-6	1.47	1.4756
154970-45-3	1.46	1.484
121492-06-6	1.446	1.4576
137-89-3	1.488	1.4853
10323-39-4	1.561	1.5632
115262-01-6	1.406	1.3977
7492-70-8	1.421	1.4333
85838-94-4	1.467	1.4888
302554-80-9	1.554	1.5435
332-48-9	1.531	1.5286
3383-83-3	1.454	1.4473
226070-05-9	1.57	1.5579
144222-22-0	1.473	1.4852
126717-59-7	1.548	1.5515
2978-10-01	1.5	1.5057
81107-97-3	1.498	1.5256
202865-72-3	1.631	1.6491
145543-82-4	1.541	1.5418
584-12-3	1.498	1.5264
1034352-30-1	1.578	1.5735
34259-99-9	1.601	1.6096
75806-84-7	1.501	1.5131
766-46-1	1.599	1.6028
75844-69-8	1.463	1.4675
815-52-1	1.46	1.4507
137382-38-8	1.501	1.4824
10269-01-9	1.588	1.6032
1513-87-7	1.314	1.3105
54149-17-6	1.4565	1.4381
22794-95-2	1.555	1.5421
357927-50-5	1.536	1.5524
128071-98-7	1.532	1.5524
303734-52-3	1.524	1.524
65896-11-9	1.582	1.5966
159635-49-1	1.465	1.4772
1238156-36-9	1.509	1.5085
261951-85-3	1.473	1.4784
77998-61-9	1.536	1.5294
95715-85-8	1.453	1.4613
14813-01-5	1.549	1.5621
958032-89-8	1.368	1.3691
13910-48-0	1.535	1.5421
477535-41-4	1.511	1.5115
17117-17-8	1.556	1.548
115467-07-7	1.435	1.4601
101-32-6	1.539	1.5491
4373-60-8	1.65	1.64
38274-16-7	1.554	1.5393
10029-09-1	1.496	1.4919
87736-75-2	1.468	1.4551
38259-00-6	1.499	1.4905
499-75-2	1.524	1.5253
623-97-2	1.4605	1.4468
13466-78-9	1.4735	1.4826
621-62-5	1.416	1.4153
2916-14-5	1.446	1.4427
105-39-5	1.4215	1.4177
108-42-9	1.594	1.5923
766-51-8	1.5445	1.5336
587-04-2	1.564	1.5626
609-65-4	1.572	1.5732
109-69-3	1.402	1.4034
928-51-8	1.453	1.4342
1951-12-08	1.441	1.4457
19372-80-6	1.532	1.53
672-65-1	1.527	1.5237
628-89-7	1.453	1.4328
1455-05-6	1.471	1.468
543-27-1	1.407	1.421
4860-03-01	1.4495	1.445
615-41-8	1.635	1.6485
17228-64-7	1.528	1.5298
107-84-6	1.4085	1.4089
3188-13-4	1.404	1.3929
507-20-0	1.386	1.4038
1712-70-5	1.5575	1.5405
121-17-5	1.49	1.4943
89-60-1	1.5575	1.5625
111-85-3	1.43	1.4279
614-72-2	1.5305	1.5255
95-57-8	1.559	1.5913
75-29-6	1.378	1.3876
127-00-4	1.438	1.4233
590-21-6	1.404	1.431
598-78-7	1.434	1.4416
109-09-1	1.533	1.5445
611-33-6	1.6465	1.6236
2039-85-2	1.562	1.5552
95-49-8	1.525	1.5405
106-43-4	1.5205	1.5405
88-16-4	1.456	1.4691
98-56-6	1.447	1.4691
1119-46-6	1.455	1.4523
95-72-7	1.5235	1.5347
14371-10-9	1.622	1.5554
103-36-6	1.56	1.5285
77-94-1	1.445	1.4602
106-22-9	1.456	1.4482
108-39-4	1.54	1.5549
623-70-1	1.4255	1.4309
623-68-7	1.475	1.4738
10487-71-5	1.46	1.4538
105-56-6	1.417	1.4156
109-78-4	1.426	1.4154
706-31-0	1.5075	1.52
291-64-5	1.445	1.4503
628-41-1	1.472	1.51
6553-80-6	1.4385	1.4488
701-97-3	1.464	1.4727
108-94-1	1.451	1.4476
108-91-8	1.459	1.467
6531-86-8	1.5	1.4897
1700-10-3	1.494	1.5138
629-20-9	1.537	1.5943
96-41-3	1.4535	1.4434
142-29-0	1.422	1.4523
99-87-6	1.49	1.4995
930-28-9	1.452	1.4419
620-20-2	1.556	1.5576
4442-79-9	1.4655	1.4612
638-41-5	1.418	1.4291
100-49-2	1.464	1.4604
2473-03-02	1.4395	1.4367
1587-21-9	1.4435	1.4589
2373-51-5	1.497	1.4814
2425-54-9	1.447	1.4423
348-51-6	1.501	1.5222
1885-14-9	1.5115	1.5453
627-00-9	1.4505	1.4499
6258-66-8	1.5895	1.597
502-41-0	1.477	1.4745
2404-35-5	1.505	1.4966
2719-27-9	1.47	1.47
628-92-2	1.4585	1.4832
920-37-6	1.43	1.439
6485-40-1	1.499	1.4841
930-68-7	1.489	1.4854
6092-54-2	1.4235	1.4331
1569-69-3	1.4935	1.4966
2919-23-5	1.4355	1.4285
1066-35-9	1.383	1.3861
4107-62-4	1.4235	1.4156
17341-93-4	1.4705	1.4921
535-77-3	1.494	1.4995
2009-83-8	1.456	1.4422
96-43-5	1.5475	1.5716
10472-24-9	1.456	1.4475
5259-98-3	1.4535	1.4387
766-00-7	1.457	1.4497
3153-37-5	1.433	1.4242
2211-69-0	1.419	1.4312
753-89-9	1.4045	1.4123
2530-87-2	1.42	1.4153
2311-59-3	1.4235	1.432
24552-27-0	1.518	1.5281
425-87-6	1.334	1.3312
33100-27-5	1.4655	1.4482
552-45-4	1.542	1.5312
41873-74-9	1.5165	1.5313
94-34-8	1.561	1.5328
2043-61-0	1.4505	1.4515
5422-88-8	1.5445	1.532
1189-71-5	1.4465	1.4693
3721-95-7	1.4425	1.4527
14618-78-1	1.4185	1.4073
1123-00-8	1.453	1.4629
818-44-0	1.43	1.4369
3050-69-9	1.422	1.4306
2346-81-8	1.418	1.4158
32807-28-6	1.458	1.4368
7205-91-6	1.595	1.5939
150-84-5	1.4435	1.4425
65405-80-3	1.4545	1.4634
628-20-6	1.4425	1.4262
4884-24-6	1.478	1.4687
693-07-2	1.488	1.4774
3779-29-1	1.435	1.4496
105-48-6	1.42	1.421
6753-98-6	1.503	1.5032
822-87-7	1.484	1.4704
6493-77-2	1.461	1.4741
17639-93-9	1.4175	1.4141
15074-54-1	1.5385	1.5688
765-30-0	1.4205	1.4344
765-42-4	1.4305	1.431
1007-03-0	1.5415	1.5497
5500-21-0	1.4215	1.4174
13361-30-3	1.416	1.4192
447-60-9	1.464	1.4676
14447-15-5	1.4215	1.4224
3019-25-8	1.4325	1.4251
6940-76-7	1.547	1.5191
13361-32-5	1.443	1.4409
2757-23-5	1.5215	1.5421
4350-41-8	1.5865	1.6024
26272-90-2	1.448	1.4505
4023-34-1	1.4525	1.4469
89-97-4	1.5615	1.5744
4333-56-6	1.459	1.4678
5452-75-5	1.4445	1.4512
55117-15-2	1.5365	1.5366
2142-68-9	1.544	1.5455
4152-90-3	1.559	1.5744
1529-41-5	1.543	1.5565
766-80-3	1.586	1.5848
7623-09-08	1.439	1.4403
19847-12-2	1.536	1.5384
53148-32-6	1.457	1.4603
1622-32-8	1.492	1.4596
59558-23-5	1.485	1.4953
70288-97-0	1.6215	1.6168
123-09-1	1.5995	1.5978
1502-22-3	1.506	1.505
1124-63-6	1.466	1.4619
57946-56-2	1.5605	1.5647
628-34-2	1.411	1.4038
42149-74-6	1.416	1.4119
2032-34-0	1.415	1.4138
443-83-4	1.5025	1.5184
10371-45-6	1.4285	1.4359
79218-15-8	1.425	1.4386
624-70-4	1.564	1.5285
21020-24-6	1.425	1.4312
105104-40-3	1.444	1.424
1719-58-0	1.416	1.4194
822-39-9	1.491	1.479
609-15-4	1.443	1.4374
5452-37-9	1.4815	1.4791
822-48-0	1.45	1.4373
134-83-8	1.603	1.6074
2942-58-7	1.402	1.4239
22734-04-9	1.467	1.4745
140-18-1	1.5255	1.5281
107-59-5	1.423	1.4292
501-29-1	1.516	1.5128
1694-29-7	1.4835	1.4347
1469-70-1	1.408	1.4205
503-60-6	1.449	1.4364
3874-54-2	1.526	1.5111
3088-41-3	1.47	1.4773
13888-03-4	1.433	1.4263
140837-33-8	1.4705	1.4734
13547-70-1	1.4415	1.4301
1559-02-0	1.433	1.4479
1641-09-4	1.5625	1.5702
77200-24-9	1.5185	1.5131
55488-51-2	1.437	1.4431
13524-04-4	1.5445	1.5546
18171-11-4	1.4165	1.4135
32653-34-2	1.449	1.4478
32653-32-0	1.4395	1.4457
13361-34-7	1.44	1.4381
615-18-9	1.5665	1.5852
50893-53-3	1.4235	1.4385
5578-42-7	1.472	1.4637
1462-33-5	1.4585	1.4273
1499-21-4	1.61	1.6016
1833-51-8	1.52	1.498
2537-48-6	1.433	1.4284
694-28-0	1.475	1.4576
611-17-6	1.592	1.5848
33924-48-0	1.547	1.5291
616-13-7	1.413	1.4089
401-56-9	1.395	1.3939
66604-31-7	1.446	1.438
6914-71-2	1.44	1.4433
141942-85-0	1.448	1.4477
51575-83-8	1.4605	1.4556
17146-09-7	1.502	1.4933
41332-02-9	1.619	1.5908
10297-06-0	1.4495	1.4441
6797-79-1	1.606	1.6217
610-96-8	1.536	1.5391
874-97-5	1.558	1.5715
6378-65-0	1.424	1.4313
16766-30-6	1.5585	1.5678
5722-11-02	1.427	1.433
17430-98-7	1.4615	1.464
29342-44-7	1.424	1.4257
33406-96-1	1.5	1.5184
60827-45-4	1.48	1.461
1572-98-1	1.4055	1.4277
40817-08-1	1.5325	1.566
608-23-1	1.532	1.5347
2441-97-6	1.49	1.4899
18736-82-8	1.481	1.4826
7338-43-4	1.463	1.4605
2100-42-7	1.5455	1.5235
3260-88-6	1.5385	1.5288
452-66-4	1.4985	1.5184
78055-64-8	1.5065	1.5088
696-02-6	1.4735	1.4987
42048-11-3	1.627	1.6292
2868-37-3	1.4175	1.4172
932-96-7	1.5835	1.5618
4461-41-0	1.4215	1.4312
77287-29-7	1.418	1.4141
1139-13-5	1.4475	1.462
6084-17-9	1.545	1.5297
62614-70-4	1.4435	1.4447
7474-05-07	1.4345	1.4416
2106-04-09	1.5635	1.5647
2267-25-6	1.5185	1.5128
5631-96-9	1.4585	1.4536
68339-45-7	1.529	1.5365
2544-05-0	1.4525	1.4436
1489-69-6	1.429	1.4146
86728-85-0	1.453	1.4491
7283-96-7	1.6055	1.584
1128-76-3	1.522	1.5311
111196-81-7	1.52	1.5236
91170-93-3	1.552	1.5548
98298-66-9	1.413	1.423
175205-54-6	1.508	1.5073
1592-20-7	1.5745	1.5447
15827-56-2	1.497	1.499
1435-44-5	1.475	1.4987
80841-78-7	1.479	1.4585
7006-52-2	1.584	1.5618
7686-77-3	1.47	1.5005
108-90-7	1.524	1.5483
6320-03-02	1.603	1.6172
17865-32-6	1.439	1.4328
6746-94-7	1.429	1.4372
18368-64-4	1.5275	1.5369
95-89-6	1.526	1.5275
82386-89-8	1.489	1.4876
4415-82-1	1.446	1.4353
4867-37-2	1.599	1.5978
831-81-2	1.585	1.6027
450-96-4	1.439	1.4664
13159-52-9	1.4755	1.463
89402-43-7	1.474	1.4925
65055-17-6	1.552	1.5511
6781-98-2	1.527	1.5347
19819-95-5	1.552	1.5588
29882-07-3	1.429	1.4153
139631-62-2	1.477	1.4632
822-13-9	1.445	1.4407
202925-07-3	1.516	1.5128
102691-36-1	1.47	1.4668
16670-48-7	1.53	1.5328
1875-88-3	1.549	1.5588
7540-51-4	1.456	1.4482
348-62-9	1.537	1.5621
31301-51-6	1.504	1.5171
126689-01-8	1.435	1.435
19788-37-5	1.487	1.4788
68220-26-8	1.568	1.5629
63024-77-1	1.574	1.5604
17249-82-0	1.537	1.5594
141738-80-9	1.54	1.5554
2766-74-7	1.587	1.594
661-82-5	1.341	1.3532
71916-91-1	1.565	1.5629
80-41-1	1.527	1.5292
69573-75-7	1.485	1.4787
1679-51-2	1.485	1.4933
140-27-2	1.52	1.512
17282-04-1	1.51	1.5171
35502-06-8	1.42	1.409
21043-40-3	1.502	1.505
5911-08-0	1.435	1.429
493024-39-8	1.562	1.5629
71916-82-0	1.5685	1.5629
51512-09-5	1.55	1.5604
1480-64-4	1.505	1.5171
5586-88-9	1.534	1.5365
4747-71-1	1.446	1.4524
62802-42-0	1.501	1.5113
13472-84-9	1.536	1.5298
598-09-4	1.434	1.4322
7357-67-7	1.474	1.4757
817181-75-2	1.511	1.5184
34941-91-8	1.501	1.5171
700-35-6	1.525	1.5255
49715-04-0	1.447	1.4552
21900-54-9	1.551	1.5511
72235-56-4	1.538	1.5514
141091-37-4	1.467	1.4673
10297-05-9	1.541	1.5122
6139-83-9	1.428	1.4245
5367-26-0	1.539	1.5625
873-31-4	1.572	1.5737
84367-31-7	1.474	1.4551
20327-23-5	1.483	1.5081
26883-70-5	1.495	1.499
1212-53-9	1.514	1.525
310-71-4	1.345	1.3484
31970-04-4	1.543	1.567
104-11-0	1.54	1.5503
4295-06-01	1.622	1.6084
3308-94-9	1.507	1.5151
140-77-2	1.457	1.4634
85148-26-1	1.448	1.4628
6921-66-0	1.577	1.5778
872-53-7	1.442	1.4371
3319-01-05	1.486	1.4909
4863-91-6	1.56	1.5647
5926-26-1	1.407	1.4047
72587-15-6	1.489	1.4896
13501-76-3	1.426	1.4233
38557-72-1	1.525	1.5275
627-26-9	1.4205	1.4283
69695-61-0	1.482	1.4992
28049-61-8	1.548	1.5609
1121-66-0	1.4965	1.4988
1855-63-6	1.482	1.4872
1019-71-2	1.619	1.5993
32137-20-5	1.436	1.4526
2212-11-05	1.413	1.4045
4667-99-6	1.39	1.4153
121-05-1	1.442	1.4417
493-01-6	1.481	1.4756
143-10-2	1.457	1.4576
2306-91-4	1.432	1.4361
30673-38-2	1.4315	1.4342
112-13-0	1.441	1.4421
25447-83-0	1.47	1.4725
112-31-2	1.4285	1.4288
104-72-3	1.4845	1.4869
764-93-2	1.427	1.4352
2179-57-9	1.542	1.5487
56-18-8	1.4815	1.479
334-49-6	1.4625	1.4627
78-90-0	1.446	1.4466
1477-55-0	1.5715	1.5768
6917-76-6	1.405	1.4039
622-22-0	1.5465	1.5524
108-36-1	1.607	1.6332
107-80-2	1.509	1.4894
5408-86-6	1.513	1.4855
629-03-8	1.507	1.4877
96-21-9	1.5515	1.5264
111-24-0	1.512	1.4902
78-75-1	1.519	1.4929
513-31-5	1.543	1.5196
102-81-8	1.4445	1.4483
629-45-8	1.4925	1.5012
1647-16-1	1.433	1.4417
3172-52-9	1.5625	1.5947
7148-06-03	1.4125	1.4205
89-87-2	1.5505	1.5361
1120-48-5	1.443	1.4452
5876-87-9	1.4385	1.4457
111-74-0	1.4315	1.4416
102-46-5	1.541	1.527
140-82-9	1.4485	1.4433
116-54-1	1.443	1.4385
553-82-2	1.561	1.554
616-21-7	1.4445	1.4304
110-56-5	1.454	1.4339
926-57-8	1.473	1.4612
623-46-1	1.4435	1.4294
2051-90-3	1.605	1.6071
75-34-3	1.4165	1.416
156-59-2	1.449	1.4662
2163-00-0	1.458	1.4413
75-54-7	1.398	1.4092
78-87-5	1.439	1.4244
594-20-7	1.4145	1.4286
616-23-9	1.4845	1.4571
78-88-6	1.461	1.4462
95-73-8	1.5455	1.5614
118-69-4	1.5505	1.5614
101-83-7	1.484	1.4894
78-62-6	1.382	1.3962
629-14-1	1.393	1.3938
126-84-1	1.389	1.4018
685-91-6	1.4385	1.4266
4402-32-8	1.426	1.4393
104-78-9	1.442	1.4481
579-66-8	1.5465	1.5318
105-05-5	1.4945	1.5027
2315-36-8	1.4705	1.4493
110-81-6	1.507	1.52
111-46-6	1.4465	1.4329
124-17-4	1.4255	1.4244
112-59-4	1.437	1.4329
100-36-7	1.435	1.4459
106-20-7	1.4425	1.4423
84-95-7	1.592	1.5685
13282-67-2	1.473	1.4704
64-67-5	1.4005	1.4123
613-48-9	1.5345	1.5116
143-16-8	1.434	1.4389
1708-29-8	1.4325	1.4455
447-53-0	1.583	1.5911
544-00-3	1.4225	1.4302
1518-72-5	1.4855	1.496
59-52-9	1.572	1.5546
151-10-0	1.525	1.5027
110-71-4	1.38	1.3713
127-19-5	1.438	1.4135
108-01-0	1.4295	1.4298
108-16-7	1.4205	1.4315
1738-25-6	1.4265	1.4281
87-59-2	1.5685	1.5494
95-78-3	1.56	1.5494
108-69-0	1.5575	1.5494
120-20-7	1.546	1.5225
75-83-2	1.37	1.3926
563-79-1	1.4115	1.4091
79-44-7	1.453	1.4401
6876-23-9	1.427	1.4348
591-21-9	1.4255	1.4348
5715-23-1	1.4645	1.4549
98-94-2	1.4545	1.456
2916-31-6	1.398	1.4129
624-92-0	1.5255	1.5402
110-70-3	1.429	1.4339
33229-89-9	1.414	1.4259
108-83-8	1.4135	1.4174
764-13-6	1.477	1.4454
6976-91-6	1.46	1.4395
573-98-8	1.616	1.5835
5392-40-5	1.488	1.462
565-59-3	1.3915	1.3956
565-80-0	1.4	1.406
109-55-7	1.435	1.443
609-72-3	1.5245	1.5218
99-97-8	1.5465	1.5218
575-41-7	1.609	1.5835
505-22-6	1.419	1.416
646-06-0	1.4005	1.388
29559-55-5	1.449	1.4381
99-62-7	1.489	1.4912
25321-09-9	1.49	1.4912
629-19-6	1.4975	1.5086
68-12-2	1.43	1.41
77-77-0	1.478	1.4527
112-16-3	1.4445	1.4456
112-54-9	1.435	1.4344
696-59-3	1.4175	1.4134
140-80-7	1.4435	1.4492
2162-99-4	1.459	1.446
1120-34-9	1.4565	1.4561
10143-60-9	1.435	1.4312
1112-39-6	1.3705	1.3798
2207-03-06	1.431	1.4348
2524-64-3	1.55	1.5888
4549-32-0	1.499	1.4841
123-01-3	1.4825	1.4846
102-83-0	1.4465	1.4538
702-79-4	1.478	1.4867
7005-47-2	1.4475	1.439
772-54-3	1.4975	1.5091
89-58-7	1.542	1.5361
589-43-5	1.395	1.4028
2648-61-5	1.5695	1.5531
4421-10-07	1.433	1.4289
563-78-0	1.39	1.4008
25611-78-3	1.5805	1.5969
513-81-5	1.439	1.417
5436-21-5	1.4155	1.4019
928-80-3	1.426	1.4258
1565-81-7	1.435	1.4323
596-75-8	1.4335	1.4426
15469-77-9	1.4495	1.4627
2384-85-2	1.433	1.441
1942-46-7	1.434	1.441
6975-99-1	1.44	1.4451
766-17-6	1.439	1.455
3074-71-3	1.409	1.4087
2216-30-0	1.404	1.4087
922-28-1	1.4105	1.4087
2051-30-1	1.406	1.4136
15869-93-9	1.4125	1.4136
541-58-2	1.509	1.5235
584-94-1	1.401	1.4028
563-16-6	1.4005	1.4078
628-68-2	1.431	1.4253
1795-17-1	1.456	1.4536
1198-37-4	1.6065	1.5824
6975-92-4	1.4095	1.4149
16745-94-1	1.4145	1.4161
2213-32-3	1.398	1.4086
625-65-0	1.4035	1.4175
4914-92-5	1.413	1.4175
3074-78-0	1.4175	1.4199
2738-18-3	1.412	1.4282
19549-98-5	1.4385	1.4496
6674-22-2	1.522	1.5281
1482-15-1	1.437	1.445
2816-57-1	1.448	1.4462
2320-30-1	1.4425	1.4462
1188-33-6	1.3965	1.4176
13093-04-4	1.448	1.4465
18503-90-7	1.418	1.4316
13093-05-5	1.446	1.4498
320-60-5	1.481	1.4925
1720-38-3	1.4515	1.456
3710-84-7	1.4195	1.4298
93-15-2	1.5335	1.511
19398-77-7	1.42	1.4136
2235-46-3	1.4705	1.4442
1120-06-5	1.4345	1.4323
5205-34-5	1.433	1.4323
144-79-6	1.573	1.5657
3352-87-2	1.4545	1.449
594-16-1	1.498	1.497
35794-11-7	1.4445	1.455
106-72-9	1.4435	1.4399
1191-99-7	1.4235	1.4455
381-73-7	1.3435	1.3181
24851-98-7	1.459	1.4542
1128-08-1	1.4795	1.463
106-21-8	1.435	1.4302
1201-38-3	1.545	1.509
80-73-9	1.472	1.4814
1559-87-1	1.518	1.538
367-25-9	1.5075	1.5138
18536-91-9	1.427	1.4333
62365-34-8	1.477	1.464
120-55-8	1.5455	1.5525
3699-67-0	1.432	1.4328
123-32-0	1.5005	1.5024
2358-84-1	1.459	1.4518
4209-90-9	1.4275	1.4252
19780-10-0	1.431	1.4319
598-56-1	1.373	1.3987
3141-27-3	1.629	1.6616
4454-05-01	1.442	1.4576
628-55-7	1.39	1.4031
4246-51-9	1.463	1.4562
5337-72-4	1.4605	1.4549
496-16-2	1.549	1.557
2426-07-05	1.445	1.441
638-02-8	1.5125	1.528
3634-56-8	1.414	1.4081
7087-68-5	1.4135	1.4206
69304-37-6	1.455	1.4356
110-57-6	1.488	1.4665
367-11-3	1.443	1.4677
625-22-9	1.421	1.4306
5509-65-9	1.508	1.5138
598-05-0	1.4135	1.4233
3913-81-3	1.455	1.4478
4885-02-03	1.43	1.4156
2700-30-3	1.4355	1.4295
13330-96-6	1.4405	1.439
7369-66-6	1.457	1.4545
26386-88-9	1.552	1.5832
3141-26-2	1.6395	1.6616
5683-33-0	1.5595	1.5215
17279-31-1	1.503	1.5103
364-74-9	1.5105	1.5009
3616-56-6	1.411	1.422
14347-78-5	1.4345	1.4432
19342-01-9	1.503	1.5103
75-99-0	1.4555	1.4786
624-29-3	1.429	1.4348
621-56-7	1.46	1.4611
4116-93-2	1.4685	1.4686
19059-68-8	1.4335	1.4421
6843-66-9	1.5435	1.5413
91-17-8	1.4755	1.4756
1513-65-1	1.4375	1.459
4549-33-1	1.496	1.4827
1704-62-7	1.4415	1.4377
332-77-4	1.434	1.4408
104-19-8	1.4645	1.4875
7691-02-03	1.44	1.4405
2627-95-4	1.413	1.4256
638-56-2	1.464	1.4426
31469-15-5	1.416	1.4181
585-48-8	1.4735	1.4884
778-24-5	1.5635	1.5492
3449-26-1	1.537	1.5303
18162-84-0	1.4355	1.43
2997-01-05	1.4625	1.4558
1789-58-8	1.415	1.4171
67362-76-9	1.549	1.502
20984-81-0	1.47	1.4669
69478-75-7	1.4655	1.4668
21245-02-3	1.541	1.4983
2142-73-6	1.53	1.5175
6065-82-3	1.41	1.4142
931-94-2	1.427	1.4257
541-02-6	1.3975	1.428
13019-22-2	1.448	1.4468
348-57-2	1.5055	1.5307
5205-93-6	1.4775	1.4643
926-64-7	1.4055	1.4215
14436-32-9	1.447	1.4557
25152-84-5	1.517	1.4686
69064-37-5	1.454	1.4558
1122-41-4	1.62	1.6326
64248-56-2	1.5105	1.5307
24892-49-7	1.434	1.4461
3748-13-8	1.557	1.5212
108963-20-8	1.57	1.589
19550-03-9	1.43	1.4252
19550-07-3	1.4235	1.4201
4209-91-0	1.426	1.4252
3179-76-8	1.427	1.4277
61827-89-2	1.464	1.4684
13393-64-1	1.448	1.4626
72235-52-0	1.491	1.5072
7226-23-5	1.4885	1.4909
17920-88-6	1.497	1.5081
540-97-6	1.401	1.4288
3290-01-05	1.579	1.5755
57597-62-3	1.414	1.399
16518-64-2	1.5625	1.523
623-57-4	1.461	1.4593
623-80-3	1.523	1.5269
2407-68-3	1.533	1.461
16881-77-9	1.36	1.3698
3490-06-0	1.533	1.5105
33486-90-7	1.544	1.5441
97-41-6	1.46	1.4564
4549-31-9	1.5025	1.4857
114389-70-7	1.5	1.503
3581-91-7	1.5185	1.5235
17018-07-4	1.454	1.4533
132958-72-6	1.465	1.4668
1563-38-8	1.541	1.5639
19398-61-9	1.547	1.5614
993-12-4	1.5445	1.5225
7433-78-5	1.425	1.436
396-64-5	1.5685	1.5661
2419-74-1	1.4815	1.4586
766-77-8	1.499	1.4851
2892-62-8	1.494	1.4718
1435-51-4	1.578	1.6061
354-51-8	1.427	1.4499
1539-42-0	1.576	1.5901
589-37-7	1.452	1.4523
3393-45-1	1.483	1.4833
101-96-2	1.536	1.5123
3883-43-0	1.498	1.4709
6299-67-8	1.564	1.5361
1120-24-7	1.4315	1.437
24774-58-1	1.501	1.4816
7396-58-9	1.448	1.4487
141-62-8	1.39	1.4124
3027-21-2	1.48	1.4781
3551-55-1	1.5005	1.4927
375-50-8	1.4295	1.4323
2401-73-2	1.406	1.4226
443-84-5	1.452	1.4715
146039-03-4	1.465	1.4605
18051-88-2	1.448	1.4445
452-76-6	1.448	1.4715
32460-00-7	1.553	1.5915
10076-48-9	1.411	1.4052
600-36-2	1.425	1.4147
4001-61-0	1.571	1.5723
26549-21-3	1.4345	1.4396
2031-62-1	1.375	1.3898
18362-64-6	1.458	1.4262
1708-41-4	1.4855	1.4835
7598-61-0	1.428	1.4264
595-37-9	1.4155	1.4299
3054-92-0	1.436	1.4227
21339-47-9	1.428	1.4349
874-63-5	1.512	1.5058
1476-11-5	1.4895	1.4665
437-81-0	1.508	1.492
35466-87-6	1.417	1.4248
93343-10-3	1.4645	1.4682
10471-28-0	1.4405	1.444
82941-26-2	1.438	1.4357
1785-61-1	1.58	1.5755
454-31-9	1.3465	1.3408
19064-18-7	1.495	1.5019
3018-12-0	1.441	1.446
589-57-1	1.4375	1.4424
4179-19-5	1.521	1.5017
5558-67-8	1.573	1.5866
2265-93-2	1.5575	1.5798
188945-41-7	1.534	1.5467
4020-99-9	1.605	1.5914
79538-20-8	1.4865	1.5019
52373-72-5	1.425	1.4331
615-59-8	1.602	1.6153
6329-61-9	1.487	1.497
85117-99-3	1.5265	1.5223
7751-38-4	1.4435	1.4299
609-11-0	1.4955	1.4895
22236-07-3	1.5005	1.4854
929-37-3	1.4475	1.4331
85118-01-0	1.5255	1.5223
7650-84-2	1.6025	1.5775
2897-60-1	1.4305	1.4283
4062-60-6	1.4295	1.4498
14970-87-7	1.51	1.4979
2470-68-0	1.439	1.4424
3449-28-3	1.444	1.4393
18204-93-8	1.45	1.4458
5659-93-8	1.448	1.4628
30093-99-3	1.4185	1.4431
290835-85-7	1.5295	1.5446
10597-60-1	1.5835	1.6105
6065-63-0	1.428	1.4394
50990-93-7	1.5055	1.4979
1571-86-4	1.488	1.4919
2175-91-9	1.547	1.5107
7223-38-3	1.419	1.4365
647-25-6	1.314	1.3004
813-72-9	1.427	1.4378
75853-20-2	1.491	1.5019
924-99-2	1.5125	1.4537
16260-48-3	1.5495	1.5464
76903-88-3	1.51	1.5088
2369-37-1	1.58	1.6061
115144-40-6	1.468	1.4682
13179-98-1	1.4135	1.4077
56011-12-2	1.399	1.4166
1067-74-9	1.433	1.4267
27425-92-9	1.461	1.4446
99584-95-9	1.5145	1.5107
39226-95-4	1.582	1.5921
14573-23-0	1.569	1.5776
321155-39-9	1.507	1.4925
60230-36-6	1.527	1.5161
67579-81-1	1.472	1.4762
5867-98-1	1.428	1.4358
10203-28-8	1.44	1.4374
2553-19-7	1.526	1.5318
65094-22-6	1.417	1.4222
85272-31-7	1.398	1.3991
1431-37-4	1.435	1.4426
32328-03-3	1.439	1.4449
57021-49-5	1.613	1.5987
1069-08-5	1.496	1.4848
5231-87-8	1.509	1.4738
57771-09-2	1.6	1.5256
3749-36-8	1.478	1.4923
63909-58-0	1.482	1.4836
60815-18-1	1.504	1.4924
63909-50-2	1.496	1.4947
39225-17-7	1.508	1.5088
2915-90-4	1.452	1.4514
1996-44-7	1.5225	1.5438
18800-53-8	1.5745	1.5723
134364-69-5	1.473	1.4682
61023-66-3	1.537	1.5278
32137-19-2	1.391	1.4095
76-67-5	1.492	1.4982
7398-56-3	1.4995	1.4963
3069-21-4	1.428	1.4283
37764-25-3	1.504	1.4945
129714-97-2	1.503	1.5088
110-05-4	1.389	1.4082
1189-24-8	1.42	1.4472
14005-14-2	1.507	1.5376
49769-78-0	1.499	1.5039
69584-87-8	1.484	1.493
22236-08-4	1.51	1.4946
1140-14-3	1.592	1.5844
5779-93-1	1.553	1.5282
700-96-9	1.591	1.5577
54132-75-1	1.529	1.5385
1703-46-4	1.58	1.5464
452-07-3	1.4905	1.4945
2979-19-3	1.447	1.4523
3828-49-7	1.453	1.4715
4077-47-8	1.48	1.4523
1003-04-9	1.529	1.5196
519177-07-2	1.505	1.5119
533-37-9	1.5445	1.5493
5728-20-1	1.562	1.5925
13670-99-0	1.482	1.4842
918-22-9	1.345	1.339
356-36-5	1.358	1.3572
3107-98-0	1.347	1.3371
2265-92-1	1.563	1.5798
85068-36-6	1.569	1.5678
1251384-75-4	1.445	1.4434
13716-10-4	1.483	1.4529
137297-49-5	1.425	1.4252
929-75-9	1.463	1.4543
14590-53-5	1.441	1.4548
17351-22-3	1.448	1.458
173443-43-1	1.554	1.5498
17673-68-6	1.467	1.4776
42601-04-7	1.498	1.5054
347838-12-4	1.4745	1.4584
4841-84-3	1.472	1.4776
17643-36-6	1.456	1.4536
4841-85-4	1.463	1.4759
26118-19-4	1.438	1.4318
10519-88-7	1.576	1.5519
2675-94-7	1.468	1.4467
775-56-4	1.47	1.4764
55764-23-3	1.509	1.5294
3698-89-3	1.461	1.4607
26452-80-2	1.545	1.5694
22348-31-8	1.584	1.5891
75626-17-4	1.475	1.4682
767291-67-8	1.466	1.4681
3084-40-0	1.437	1.4296
72593-77-2	1.461	1.4426
55745-70-5	1.601	1.569
32806-04-5	1.424	1.4137
868-26-8	1.464	1.4591
1513-66-2	1.443	1.459
4629-80-5	1.458	1.4671
7283-70-7	1.435	1.4464
135926-93-1	1.553	1.5387
6802-75-1	1.45	1.4448
1116-77-4	1.421	1.4289
5856-77-9	1.424	1.4301
29421-73-6	1.614	1.6382
4393-09-03	1.542	1.5286
5763-61-1	1.556	1.5286
148256-63-7	1.53	1.5338
140134-21-0	1.554	1.583
71902-33-5	1.444	1.459
1435-46-7	1.519	1.5468
149703-84-4	1.546	1.5528
151223-12-0	1.456	1.4487
927-63-9	1.586	1.4574
128988-04-5	1.437	1.4526
60811-24-7	1.527	1.5438
2156-97-0	1.443	1.446
27064-94-4	1.557	1.5642
925-47-3	1.465	1.4725
55897-65-9	1.411	1.4225
34941-90-7	1.439	1.459
125607-30-9	1.542	1.5387
170702-05-3	1.577	1.5735
122107-04-4	1.493	1.4914
137348-86-8	1.439	1.4516
36969-89-8	1.445	1.4335
1232692-92-0	1.4945	1.4722
7778-85-0	1.385	1.3812
38360-81-5	1.569	1.5723
960524-18-9	1.489	1.4855
5724-56-1	1.535	1.5336
13191-36-1	1.613	1.6382
113211-94-2	1.529	1.5223
73960-07-3	1.505	1.4783
16386-93-9	1.434	1.4513
41051-80-3	1.424	1.4268
29263-94-3	1.449	1.4636
23790-39-8	1.461	1.4539
54094-19-8	1.475	1.4649
40665-68-7	1.517	1.5005
1829-60-3	1.496	1.5131
1089687-03-5	1.461	1.4474
26303-90-2	1.449	1.4627
113028-75-4	1.599	1.5956
21789-36-6	1.53	1.5336
1475-13-4	1.56	1.5721
6575-27-5	1.577	1.5921
694-48-4	1.472	1.4883
42389-54-8	1.476	1.478
158956-23-1	1.537	1.5421
126422-57-9	1.463	1.4513
54648-79-2	1.435	1.4365
1336893-15-2	1.562	1.5451
866-23-9	1.463	1.4657
17920-23-9	1.438	1.4483
2265-91-0	1.554	1.5798
694-31-5	1.481	1.4883
77078-22-9	1.411	1.4057
2212-32-0	1.455	1.4589
6921-28-4	1.476	1.4782
5575-48-4	1.423	1.4239
2163-48-6	1.42	1.4306
495-07-8	1.494	1.4945
675-62-7	1.384	1.3844
58-73-1	1.547	1.5553
430-67-1	1.343	1.3224
1535-65-5	1.502	1.4833
2173-82-2	1.4605	1.4597
5803-30-5	1.536	1.5052
4285-48-7	1.521	1.5025
10519-87-6	1.418	1.4219
455-31-2	1.458	1.46
6590-97-2	1.675	1.6709
393-38-4	1.395	1.4095
40046-30-8	1.62	1.6133
3085-76-5	1.427	1.4313
617-83-4	1.423	1.4281
156682-52-9	1.564	1.5814
2261-99-6	1.35	1.3289
1550-44-3	1.354	1.3408
79080-31-2	1.41	1.4265
18022-66-7	1.479	1.4722
106-89-8	1.438	1.4197
75-56-9	1.366	1.3712
542-10-9	1.4005	1.413
594-45-6	1.434	1.4291
75-08-1	1.432	1.4399
10031-82-0	1.5585	1.5195
134-11-2	1.542	1.5407
110-80-5	1.4075	1.4001
111-15-9	1.4055	1.4046
4324-38-3	1.421	1.4233
613-69-4	1.544	1.5195
578-54-1	1.561	1.5455
100-41-4	1.4955	1.5088
760-21-4	1.397	1.4039
97-96-1	1.4035	1.4056
1678-91-7	1.433	1.4377
97-90-5	1.4545	1.4505
111-55-7	1.416	1.4158
94-96-2	1.451	1.4429
104-76-7	1.431	1.4251
1632-16-2	1.4145	1.4174
104-75-6	1.431	1.4314
420-12-2	1.494	1.503
78-93-3	1.3795	1.3816
624-89-5	1.44	1.4488
100-74-3	1.4405	1.4541
939-27-5	1.599	1.5803
612-22-6	1.535	1.5326
597-49-9	1.43	1.4232
90-00-6	1.5365	1.5424
92-59-1	1.5955	1.5771
766-09-6	1.4445	1.4579
100-71-0	1.498	1.5038
536-75-4	1.5015	1.5038
94-68-8	1.547	1.5265
622-57-1	1.544	1.5265
620-14-4	1.496	1.507
115-21-9	1.425	1.4424
109-92-2	1.3765	1.3884
2984-50-1	1.4195	1.4233
112-48-1	1.414	1.4172
110-76-9	1.4095	1.4115
5145-99-3	1.441	1.4503
91-53-2	1.5735	1.5544
16219-75-3	1.491	1.5112
623-56-3	1.404	1.4087
1067-08-9	1.408	1.4078
2216-32-2	1.408	1.4109
5396-61-2	1.442	1.4522
1758-88-9	1.503	1.5056
934-80-5	1.503	1.5056
2146-38-5	1.4415	1.4515
5397-31-9	1.4395	1.4388
60044-74-8	1.408	1.4043
4439-24-1	1.416	1.4139
17302-01-1	1.4205	1.4178
54897-62-0	1.4735	1.4504
5063-65-0	1.414	1.4179
2404-44-6	1.429	1.4311
105-72-6	1.424	1.4326
763-69-9	1.4065	1.4113
625-50-3	1.4335	1.4175
111-45-5	1.4355	1.4292
5129-72-6	1.4355	1.4245
627-50-9	1.475	1.4755
930-22-3	1.417	1.4146
2224-15-9	1.4675	1.4385
105-95-3	1.471	1.4695
20193-20-8	1.3965	1.4113
7580-85-0	1.4175	1.4171
2687-91-4	1.466	1.4592
587-02-0	1.556	1.5455
4534-74-1	1.462	1.4581
10431-98-8	1.4365	1.4374
627-03-2	1.4185	1.4158
872-55-9	1.5125	1.5238
5323-87-5	1.5035	1.4732
34322-82-2	1.4055	1.4112
29976-53-2	1.4755	1.4787
1540-34-7	1.4415	1.4195
85721-25-1	1.442	1.4438
625-54-7	1.363	1.3796
13519-75-0	1.5685	1.5503
3728-55-0	1.4325	1.4381
30727-14-1	1.466	1.4696
27538-10-9	1.511	1.48
381670-30-0	1.472	1.471
1585-06-4	1.5025	1.499
33697-53-9	1.425	1.4303
10417-94-4	1.499	1.5132
617-92-5	1.48	1.4906
1569-02-4	1.4065	1.4064
5205-39-0	1.4425	1.4432
15679-12-6	1.505	1.5158
4016-11-09	1.408	1.4026
15679-09-1	1.5105	1.5192
4853-75-2	1.4535	1.4163
51048-29-4	1.497	1.4744
36239-09-5	1.429	1.4368
21282-97-3	1.455	1.4496
3612-18-8	1.463	1.4705
5459-93-8	1.4515	1.4593
14804-32-1	1.513	1.5027
18282-40-1	1.595	1.5974
2807-30-9	1.4135	1.4097
764-48-7	1.434	1.4224
23676-09-7	1.519	1.5027
103-75-3	1.439	1.4589
67843-74-7	1.438	1.4197
141546-97-6	1.3965	1.4002
61715-72-8	1.557	1.5489
79887-10-8	1.522	1.517
5668-93-9	1.593	1.5816
51594-55-9	1.438	1.4197
705-31-7	1.465	1.4764
7328-17-8	1.438	1.4325
65214-82-6	1.48	1.4867
1201-90-7	1.531	1.5248
766-82-5	1.544	1.5444
42926-52-3	1.553	1.5311
86704-82-7	1.57	1.5611
768-59-2	1.528	1.533
7318-00-5	1.5	1.4598
72797-16-1	1.488	1.4853
873-64-3	1.505	1.5132
624-78-2	1.375	1.3896
1754-55-8	1.502	1.5074
4788-37-8	1.5	1.5134
52182-15-7	1.56	1.582
62452-73-7	1.533	1.5278
19781-62-5	1.462	1.4581
692-86-4	1.438	1.4431
66793-76-8	1.424	1.4313
20120-24-5	1.455	1.4656
2305-25-1	1.429	1.4341
597-67-1	1.413	1.4072
13327-56-5	1.46	1.4647
121-39-1	1.519	1.5204
10348-47-7	1.424	1.4316
35243-43-7	1.493	1.4905
14369-81-4	1.4575	1.4389
78834-75-0	1.4535	1.4474
371-26-6	1.352	1.3585
32499-64-2	1.488	1.4993
3618-04-0	1.465	1.4674
1452-94-4	1.523	1.528
1721-26-2	1.506	1.5065
24228-40-8	1.514	1.5298
30727-18-5	1.452	1.465
77-83-8	1.505	1.5179
88767-98-0	1.454	1.4692
41731-83-3	1.554	1.5666
607-97-6	1.421	1.424
4298-52-6	1.584	1.5741
14924-53-9	1.426	1.4296
108928-00-3	1.475	1.4792
106-86-5	1.47	1.4737
91328-77-7	1.464	1.4697
609-12-1	1.449	1.4498
2432-42-0	1.459	1.4672
121134-38-1	1.495	1.4946
1126-93-8	1.409	1.4163
22897-99-0	1.455	1.4587
67028-40-4	1.505	1.5027
2795-50-8	1.324	1.3146
13184-86-6	1.53	1.5194
7341-17-5	1.456	1.4532
2817-71-2	1.469	1.4839
70445-33-9	1.451	1.4476
40842-04-4	1.457	1.4494
6191-99-7	1.4885	1.4534
13669-10-8	1.542	1.5243
71233-25-5	1.48	1.478
5751-80-4	1.522	1.525
1479-24-9	1.516	1.4997
5751-82-6	1.538	1.5444
26510-95-2	1.57	1.5483
41607-95-8	1.532	1.5087
51725-82-7	1.526	1.5121
80370-42-9	1.473	1.4341
1940-18-7	1.466	1.4643
3788-94-1	1.475	1.446
311-46-6	1.434	1.4228
51145-57-4	1.535	1.462
31253-08-4	1.496	1.4936
78489-65-3	1.58	1.5711
32122-09-1	1.496	1.5002
348-54-9	1.5415	1.5401
462-06-6	1.4665	1.4921
352-70-5	1.4695	1.4924
75-12-7	1.448	1.3982
104-57-4	1.515	1.5228
110-45-2	1.3975	1.4059
625-55-8	1.368	1.3857
110-74-7	1.3765	1.3893
623-91-6	1.44	1.4474
611-13-2	1.4875	1.4654
98-02-2	1.531	1.5306
617-89-0	1.49	1.4966
1493-27-2	1.532	1.5242
105-75-9	1.4465	1.4532
367-12-4	1.5145	1.5356
615-10-1	1.4745	1.4659
372-20-3	1.514	1.5356
7787-20-4	1.4615	1.4712
1123-98-4	1.584	1.6046
627-45-2	1.4315	1.4146
446-52-6	1.522	1.5144
7755-92-2	1.5115	1.5059
352-11-4	1.513	1.5145
456-41-7	1.5455	1.5433
456-42-8	1.5115	1.5145
321-38-0	1.5925	1.5839
459-46-1	1.548	1.5433
372-48-5	1.4675	1.4845
403-54-3	1.5055	1.5207
59303-07-0	1.598	1.5915
321-28-8	1.496	1.4878
527-69-5	1.532	1.4992
242812-04-0	1.5945	1.5981
394-35-4	1.5025	1.4986
1438-91-1	1.5215	1.5233
140-75-0	1.5135	1.5292
456-49-5	1.489	1.4878
326-62-5	1.501	1.5132
446-51-5	1.514	1.5248
403-42-9	1.5105	1.5032
1711-07-5	1.527	1.5299
146137-78-2	1.4515	1.4485
10200-59-6	1.574	1.5572
455-34-5	1.587	1.5806
399-75-7	1.5855	1.59
6068-62-8	1.429	1.4221
2356-16-3	1.4255	1.4164
4093-49-6	1.4455	1.4313
452-64-2	1.481	1.4926
402-44-8	1.401	1.425
104-62-1	1.507	1.5163
42908-73-6	1.5585	1.6071
400-74-8	1.4645	1.455
78850-78-9	1.558	1.5696
36415-21-1	1.545	1.5458
392-85-8	1.407	1.425
371-42-6	1.5505	1.5698
342-24-5	1.5855	1.5848
443-88-9	1.479	1.4926
350-51-6	1.5165	1.5117
2557-78-0	1.5545	1.5698
3154-51-6	1.453	1.4417
332-42-3	1.533	1.5341
1999-00-4	1.513	1.4997
1978-38-7	1.5365	1.5174
405-99-2	1.5145	1.5117
130612-84-9	1.541	1.5628
1522-41-4	1.411	1.3958
332-43-4	1.507	1.5087
1717-59-5	1.362	1.3718
3093-88-7	1.491	1.5103
257610-49-4	1.56	1.5404
456-03-1	1.505	1.4989
452-84-6	1.534	1.5333
2369-18-8	1.476	1.486
89-99-6	1.517	1.5292
90176-80-0	1.453	1.4485
1978-33-2	1.536	1.5333
68359-57-9	1.583	1.5846
371-15-3	1.55	1.5568
1077-01-6	1.393	1.4243
461-87-0	1.472	1.486
658-28-6	1.557	1.5568
1481-36-3	1.393	1.3855
13194-67-7	1.579	1.5913
7589-27-7	1.508	1.517
167683-93-4	1.526	1.5224
1544-68-9	1.621	1.6208
459-26-7	1.484	1.4852
437-86-5	1.529	1.5201
59020-90-5	1.541	1.5444
1438-94-4	1.532	1.5487
61272-76-2	1.636	1.6434
2035-89-4	1.433	1.4076
29169-64-0	1.522	1.5407
114435-02-8	1.398	1.3739
22062-53-9	1.524	1.5117
208173-19-7	1.472	1.4651
109227-12-5	1.453	1.4651
189807-21-4	1.468	1.4651
188815-30-7	1.451	1.4485
50919-06-7	1.511	1.517
701-27-9	1.531	1.5357
177756-62-6	1.525	1.5117
2905-21-7	1.537	1.5357
405-66-3	1.497	1.511
443-89-0	1.536	1.5333
364-77-2	1.616	1.6218
69045-82-5	1.402	1.4164
4088-84-0	1.447	1.4511
13529-27-6	1.444	1.4512
52721-69-4	1.512	1.5212
1480-87-1	1.532	1.5193
149793-69-1	1.445	1.4511
452-68-6	1.577	1.5913
60611-24-7	1.459	1.4485
369-32-4	1.514	1.5022
105-87-3	1.4575	1.4586
25395-31-7	1.4425	1.44
102-76-1	1.4305	1.435
139-45-7	1.433	1.4417
818-38-2	1.424	1.4295
123-34-2	1.463	1.4571
2873-74-7	1.4725	1.463
2530-83-8	1.4285	1.4222
105-86-2	1.457	1.4608
689-67-8	1.467	1.4606
623-50-7	1.4175	1.4158
1501-27-5	1.4385	1.4413
1070-62-8	1.4355	1.4442
64491-70-9	1.405	1.391
60456-26-0	1.4275	1.4287
57044-25-4	1.433	1.4173
4740-78-7	1.454	1.449
71031-03-3	1.531	1.5239
18180-30-8	1.448	1.4386
[truncated: 1,626 more rows]

## Sheet: Table S2
Table S2. Experimental and predicted values of the refractive index for the TCI test set.
Exp. = Experimental values from TCI catalog
GF = predicted GF values
CASRN	Exp.	GF
107-29-9	1.425	1.4141
628-63-7	1.4025	1.4113
927-68-4	1.454	1.4498
105-46-4	1.389	1.4015
542-58-5	1.4235	1.4177
10031-87-5	1.4105	1.4145
103-09-3	1.4195	1.4233
110-19-0	1.39	1.4015
108-21-4	1.3775	1.3922
112-14-1	1.42	1.4253
109-60-4	1.3845	1.3954
941-98-0	1.6285	1.5935
105-50-0	1.44	1.4381
77-76-9	1.378	1.3846
98-86-2	1.5335	1.524
506-96-7	1.45	1.4453
75-36-5	1.389	1.3952
762-21-0	1.442	1.4537
1696-20-4	1.483	1.4678
1122-62-9	1.5225	1.5196
1122-54-9	1.529	1.5196
141-32-2	1.418	1.4263
103-11-7	1.435	1.4373
107-13-1	1.3915	1.3995
103-23-1	1.4465	1.4476
106-00-3	1.4425	1.4361
111-69-3	1.4385	1.4301
106-92-3	1.4345	1.429
557-40-4	1.4165	1.4262
97-53-0	1.54	1.5434
1746-13-0	1.5215	1.5197
645-36-3	1.4175	1.4215
123-92-2	1.4	1.4087
141-43-5	1.4545	1.4332
929-06-6	1.459	1.4428
78-96-6	1.448	1.4351
123-00-2	1.477	1.4851
98-16-8	1.4805	1.4796
919-30-2	1.4215	1.43
110-58-7	1.411	1.4196
693-65-2	1.412	1.4174
1002-16-0	1.414	1.4151
62-53-3	1.5865	1.5694
591-31-1	1.5525	1.5265
606-45-1	1.5335	1.5107
90-04-0	1.575	1.5494
7756-96-9	1.5455	1.5291
123-98-8	1.4685	1.4644
141-97-9	1.4195	1.4161
103-24-2	1.4495	1.4498
105-99-7	1.4345	1.4411
22577-15-7	1.4415	1.4471
455-14-1	1.4835	1.4796
140-39-6	1.501	1.5153
517-23-7	1.4595	1.4446
103-45-7	1.498	1.5073
141-04-8	1.4315	1.438
17768-41-1	1.513	1.5111
32210-23-4	1.452	1.4516
4271-99-2	1.464	1.4536
818-61-1	1.4495	1.444
4292-92-6	1.444	1.4454
2049-95-8	1.4955	1.4963
4435-53-4	1.408	1.4088
1760-24-3	1.445	1.4417
506-32-1	1.488	1.5002
2550-04-01	1.4075	1.4211
22483-09-6	1.4165	1.408
2308-18-1	1.4285	1.4279
7779-75-1	1.4245	1.424
1694-31-1	1.42	1.4266
77-90-7	1.4425	1.4555
2998-04-01	1.4525	1.4582
4319-49-7	1.4775	1.4947
5117-12-04	1.511	1.487
1670-46-8	1.49	1.4494
2497-18-9	1.427	1.4386
589-09-3	1.564	1.5446
7154-73-6	1.4685	1.4798
4245-35-6	1.421	1.428
103-54-8	1.541	1.5285
623-17-6	1.462	1.4657
19660-16-3	1.5245	1.5102
16436-00-3	1.44	1.4382
76238-22-7	1.435	1.4454
28069-74-1	1.423	1.4323
106-19-4	1.4305	1.4375
693-80-1	1.452	1.4546
33228-44-3	1.5295	1.5229
64030-44-0	1.5745	1.5589
103429-90-9	1.4185	1.4168
5856-62-2	1.451	1.4405
58430-94-7	1.4215	1.4267
2217-41-6	1.5905	1.5867
594-39-8	1.3995	1.4198
13325-10-5	1.4615	1.4449
765-39-9	1.539	1.5543
4030-18-6	1.475	1.4592
2516-34-9	1.438	1.4409
17640-25-4	1.451	1.4441
445-02-3	1.532	1.5292
542-59-6	1.423	1.4158
592-20-1	1.4145	1.4087
36768-62-4	1.47	1.4845
5396-89-4	1.5105	1.5138
2749-11-03	1.45	1.4351
591-12-8	1.4475	1.4611
6962-92-1	1.4335	1.4291
79286-79-6	1.4895	1.4856
79286-74-1	1.5065	1.4848
3218-02-08	1.4625	1.467
13483-31-3	1.4225	1.4287
5715-02-06	1.516	1.538
10599-70-9	1.488	1.475
13214-66-9	1.5185	1.5259
7779-81-9	1.434	1.4355
16939-73-4	1.431	1.4413
1191-16-8	1.4295	1.4311
407-47-6	1.35	1.3584
393-39-5	1.4635	1.4617
2357-47-3	1.466	1.4617
128345-57-3	1.489	1.4856
114715-38-7	1.544	1.5633
4388-97-0	1.4475	1.4448
13679-74-8	1.561	1.5346
6928-85-4	1.484	1.5154
15667-63-7	1.424	1.4374
5950-34-5	1.442	1.4449
17747-43-2	1.503	1.5137
24691-16-5	1.439	1.4503
40235-68-5	1.4525	1.4368
2186-92-7	1.505	1.4896
13258-63-4	1.5395	1.5384
4028-23-3	1.429	1.4246
7539-12-0	1.471	1.4668
23431-48-3	1.519	1.517
81731-43-3	1.4095	1.4159
6034-46-4	1.4235	1.4337
1732-10-1	1.436	1.4352
2975-41-9	1.5605	1.58
33558-75-7	1.449	1.4288
5726-19-2	1.4385	1.4469
76497-39-7	1.489	1.5012
20173-24-4	1.5395	1.5384
5048-26-0	1.422	1.4306
1576-85-8	1.418	1.4263
104954-58-7	1.4295	1.4295
35897-13-3	1.41	1.4145
16437-69-7	1.454	1.464
68076-36-8	1.4585	1.4611
51857-17-1	1.4645	1.462
5368-81-0	1.5265	1.5107
86961-07-1	1.471	1.4726
1663-39-4	1.41	1.4265
50373-54-1	1.4155	1.4193
48145-04-6	1.5195	1.516
932-17-2	1.483	1.4736
14593-43-2	1.5075	1.514
615-65-6	1.5755	1.5785
16212-05-8	1.548	1.5358
878-00-2	1.5385	1.5326
919-19-7	1.4225	1.4233
454-79-5	1.5215	1.5292
2961-50-4	1.4905	1.4927
5048-35-1	1.4305	1.4369
433-94-3	1.4975	1.5035
28752-82-1	1.556	1.5329
2832-10-02	1.4535	1.4394
3056-59-5	1.497	1.5102
2628-16-2	1.539	1.529
2754-27-0	1.3885	1.3978
88390-32-3	1.4615	1.4444
535-52-4	1.461	1.4617
58859-46-4	1.4825	1.4912
820-71-3	1.413	1.4163
1736-60-3	1.427	1.4434
30433-91-1	1.552	1.5591
207974-07-0	1.537	1.533
1173168-18-7	1.4095	1.4088
13369-74-9	1.487	1.5027
999-55-3	1.431	1.4395
24400-84-8	1.467	1.4261
54962-75-3	1.529	1.5292
54410-90-1	1.466	1.4605
2179-59-1	1.518	1.5277
26452-98-2	1.525	1.5369
23787-80-6	1.522	1.5121
627-40-7	1.38	1.3884
1709-71-3	1.473	1.4689
35320-23-1	1.45	1.4351
41838-46-4	1.472	1.4876
7087-21-0	1.403	1.4227
911200-98-1	1.497	1.4992
27593-23-3	1.506	1.4805
7493-74-5	1.515	1.516
4166-20-5	1.481	1.4653
31410-01-2	1.504	1.5052
2770-11-08	1.62	1.6352
17920-35-3	1.578	1.5462
2213-43-6	1.476	1.4955
23159-07-1	1.471	1.4783
2294-76-0	1.489	1.4927
4228-10-08	1.562	1.5491
86770-67-4	1.466	1.441
17898-21-4	1.443	1.4221
16308-68-2	1.501	1.5212
77866-59-2	1.4655	1.4605
625471-18-3	1.471	1.4868
134179-38-7	1.469	1.4459
51387-90-7	1.47	1.4751
5699-41-2	1.482	1.4613
27757-85-3	1.569	1.575
6044-68-4	1.396	1.3975
34231-78-2	1.533	1.5326
86770-68-5	1.467	1.4566
22990-77-8	1.485	1.4925
38793-01-0	1.462	1.4648
26116-12-1	1.466	1.4751
202256-86-8	1.491	1.4919
3663-44-3	1.428	1.4205
5137-52-0	1.487	1.4977
1300-94-3	1.514	1.5176
370069-31-1	1.474	1.4852
606130-90-9	1.452	1.4271
88192-19-2	1.465	1.4346
874473-14-0	1.444	1.4435
55676-21-6	1.546	1.5425
535-17-1	1.423	1.4337
61477-40-5	1.455	1.4405
80-44-4	1.5	1.509
80-18-2	1.517	1.5245
271-89-6	1.567	1.5659
939-54-8	1.548	1.5507
774-65-2	1.491	1.5031
93-89-0	1.5055	1.5121
94-46-2	1.4935	1.4978
939-48-0	1.494	1.5042
2315-68-6	1.5005	1.5073
95-16-9	1.642	1.6337
618-32-6	1.589	1.5833
1603-79-8	1.516	1.5188
5736-88-9	1.5405	1.5095
25415-84-3	1.4255	1.4295
1633-83-6	1.4635	1.4575
71-36-3	1.399	1.3994
112-71-0	1.4605	1.4553
627-27-0	1.422	1.4233
1795-09-1	1.49	1.49
611-10-9	1.453	1.4497
104-13-2	1.535	1.5288
83-27-2	1.4245	1.4315
3978-81-2	1.496	1.4952
2550-26-7	1.5115	1.5114
100-39-0	1.5755	1.5663
103-50-4	1.562	1.573
607-81-8	1.4865	1.4986
622-08-2	1.5225	1.5241
2116-65-6	1.5815	1.5898
112-26-5	1.461	1.4388
1656-48-0	1.441	1.4291
112-49-2	1.423	1.4079
111-96-6	1.4075	1.3945
688-74-4	1.409	1.4151
150-46-9	1.375	1.3845
121-43-7	1.3565	1.3502
96-32-2	1.457	1.4468
2142-69-0	1.5685	1.5721
583-68-6	1.6015	1.6073
2398-37-0	1.5635	1.562
104-92-7	1.5635	1.562
610-94-6	1.559	1.5644
2052-07-05	1.6285	1.639
78-76-2	1.4365	1.4331
80-58-0	1.473	1.4798
26074-52-2	1.5125	1.504
108-37-2	1.5765	1.6028
109-70-6	1.4865	1.4635
112-29-8	1.456	1.4515
74-96-4	1.4245	1.4235
585-71-7	1.56	1.5497
592-55-2	1.445	1.4355
629-04-9	1.45	1.4465
111-25-1	1.447	1.4441
600-00-0	1.444	1.4537
507-36-8	1.442	1.441
507-19-7	1.4275	1.437
111-83-1	1.4535	1.4485
110-53-2	1.444	1.441
101-55-3	1.6085	1.6299
75-26-3	1.4255	1.427
627-18-9	1.4885	1.4681
598-72-1	1.476	1.4821
539-74-2	1.4525	1.452
563-76-8	1.52	1.5099
626-55-1	1.57	1.5814
95-46-5	1.556	1.5705
75-62-7	1.506	1.526
401-78-5	1.473	1.4957
576-22-7	1.555	1.561
110-63-4	1.446	1.4345
431-03-8	1.395	1.3979
513-53-1	1.436	1.4445
6117-80-2	1.4785	1.4775
598-32-3	1.413	1.4187
2426-08-06	1.4185	1.4176
112-34-5	1.432	1.4263
18979-72-1	1.5245	1.521
78-92-2	1.397	1.3954
13952-84-6	1.393	1.4077
1126-78-9	1.5335	1.5174
104-51-8	1.49	1.4998
98-06-6	1.4925	1.4994
88-60-8	1.519	1.5221
3266-23-7	1.3775	1.3854
638-46-0	1.4485	1.4553
628-29-5	1.447	1.4537
88-18-6	1.5235	1.5252
2955-67-1	1.4415	1.434
2396-68-1	1.548	1.5472
111-34-2	1.4	1.4088
110-69-0	1.4365	1.4324
540-18-1	1.4125	1.4215
109-21-7	1.4065	1.4169
105-54-4	1.393	1.4043
539-90-2	1.4035	1.4145
623-42-7	1.3875	1.3954
123-20-6	1.41	1.421
96-48-0	1.437	1.4207
495-40-9	1.52	1.5114
628-81-9	1.382	1.393
533-68-6	1.4475	1.4508
75-25-2	1.597	1.5761
6627-55-0	1.579	1.6072
105-83-9	1.473	1.4744
3178-22-1	1.4465	1.4433
112-73-2	1.4235	1.4237
3592-44-7	1.532	1.5099
16532-02-8	1.4655	1.4483
2386-60-9	1.456	1.439
1726-23-4	1.4915	1.4955
1073-06-9	1.527	1.5555
460-00-4	1.5275	1.5555
22118-09-8	1.495	1.4828
92-51-3	1.48	1.4741
4435-50-1	1.47	1.4615
4221-99-2	1.397	1.3954
1126-79-0	1.497	1.4962
2482-57-7	1.478	1.4638
693-67-4	1.4575	1.4527
629-72-1	1.462	1.456
1003-09-4	1.587	1.6097
503-17-3	1.3915	1.4086
5451-72-9	1.5035	1.5002
6959-71-3	1.4175	1.4167
3056-64-2	1.4965	1.5024
98-19-1	1.496	1.4985
1075-38-3	1.495	1.4989
496-77-5	1.432	1.4351
57545-63-8	1.416	1.4145
2362-10-09	1.439	1.4291
14579-91-0	1.468	1.4439
766-92-7	1.563	1.5661
553-94-6	1.551	1.561
37920-25-5	1.5195	1.5059
4344-55-2	1.5375	1.5241
2579-20-6	1.493	1.4919
7269-35-4	1.5535	1.5492
75-27-4	1.496	1.4927
1200-14-2	1.5255	1.5133
626-88-0	1.446	1.4411
111-75-1	1.4445	1.4424
1638-22-8	1.518	1.5257
2893-05-02	1.504	1.5041
41145-84-0	1.4485	1.4525
15206-55-0	1.527	1.525
590-14-7	1.454	1.4739
7209-38-3	1.503	1.5155
1742-14-9	1.5635	1.5537
1852-16-0	1.466	1.4502
872-31-1	1.5925	1.6097
39190-67-5	1.408	1.4208
6789-88-4	1.493	1.4977
2549-93-1	1.4945	1.4919
2857-97-8	1.4245	1.4241
2568-25-4	1.5115	1.5203
3121-70-8	1.5715	1.5648
4152-09-04	1.54	1.5506
455-32-3	1.498	1.5046
583-55-1	1.6625	1.6769
18742-02-4	1.4815	1.4682
80-54-6	1.5045	1.5002
4360-63-8	1.482	1.4684
6290-03-05	1.44	1.43
24347-58-8	1.433	1.4256
327-52-6	1.486	1.5081
64689-70-9	1.633	1.6068
23936-60-9	1.508	1.4576
33884-43-4	1.481	1.4784
7065-46-5	1.422	1.4301
493-09-4	1.55	1.5634
1618-26-4	1.5345	1.5285
3587-60-8	1.5255	1.5221
83803-80-9	1.482	1.4842
5061-21-2	1.5055	1.49
628-67-1	1.4235	1.4258
1974-05-06	1.45	1.4438
591-18-4	1.661	1.6769
7154-66-7	1.5965	1.6007
6482-24-2	1.447	1.4301
402-43-7	1.473	1.4957
30273-11-1	1.5365	1.5255
576-83-0	1.5525	1.5536
2157-24-6	1.46	1.4552
2425-74-3	1.4335	1.4297
3034-53-5	1.593	1.6096
56746-19-1	1.584	1.5684
3377-87-5	1.4465	1.4411
2586-62-1	1.649	1.6315
452-63-1	1.528	1.5472
7397-06-0	1.499	1.4985
19132-06-0	1.432	1.4256
583-71-1	1.5565	1.561
18471-40-4	1.544	1.5633
1000-70-0	1.4335	1.4247
15484-80-7	1.5185	1.5132
946-02-1	1.52	1.5171
101-49-5	1.521	1.5237
5205-11-08	1.52	1.5197
98-87-3	1.551	1.5495
328-75-6	1.4275	1.4249
1973-22-4	1.549	1.5574
588-96-5	1.551	1.5505
2778-42-9	1.5115	1.5261
76364-76-6	1.5265	1.5388
20965-20-2	1.472	1.4572
81367-59-1	1.4625	1.4558
5445-17-0	1.452	1.446
667-27-6	1.3875	1.4084
2516-93-0	1.4265	1.4289
1119-51-3	1.4635	1.4609
54512-75-3	1.4845	1.4644
5469-26-1	1.466	1.4557
10224-18-7	1.533	1.5133
6091-64-1	1.543	1.5538
348-61-8	1.505	1.5307
17480-69-2	1.563	1.5782
101930-07-8	1.5485	1.5616
38661-72-2	1.4845	1.4848
30318-99-1	1.5785	1.5918
25333-24-8	1.5245	1.5138
14660-52-7	1.459	1.4552
69478-77-9	1.5225	1.5366
4210-32-6	1.5175	1.5167
23583-21-3	1.504	1.5146
169750-99-6	1.5255	1.54
39895-55-1	1.52	1.5224
51554-94-0	1.512	1.515
37865-96-6	1.472	1.4713
51554-95-1	1.526	1.5326
76287-49-5	1.518	1.5224
51554-93-9	1.5135	1.5185
126930-72-1	1.5055	1.507
78358-86-8	1.548	1.5423
51102-74-0	1.5605	1.5402
38002-45-8	1.482	1.4639
26204-05-7	1.512	1.483
94124-39-7	1.5155	1.5062
5437-45-6	1.544	1.5507
66582-26-1	1.5395	1.55
7340-90-1	1.547	1.5424
17985-72-7	1.5115	1.4719
2550-36-9	1.492	1.4834
23915-07-3	1.5255	1.5223
51436-99-8	1.528	1.5472
14856-79-2	1.491	1.4967
53463-68-6	1.4785	1.4677
14411-56-4	1.492	1.4961
328-70-1	1.427	1.4442
10009-70-8	1.474	1.4821
102308-32-7	1.446	1.4677
877-65-6	1.518	1.5194
461-96-1	1.4995	1.5307
2696-85-7	1.5375	1.5288
13683-41-5	1.4575	1.4441
5324-30-1	1.4605	1.4532
6425-39-4	1.4835	1.4946
1080-32-6	1.4965	1.4948
38573-88-5	1.508	1.5307
24398-88-7	1.5425	1.5538
2917-46-6	1.46	1.4272
941-37-7	1.52	1.5216
4265-27-4	1.536	1.5297
134340-00-4	1.446	1.4159
2105-94-4	1.567	1.5958
34626-51-2	1.4825	1.4679
2357-52-0	1.5445	1.5403
2117-28-4	1.416	1.4023
60811-21-4	1.5535	1.5768
32247-96-4	1.444	1.4463
349-58-6	1.416	1.4218
1746-23-2	1.5265	1.5112
29823-18-5	1.4595	1.4572
2639-63-6	1.417	1.4253
774-48-1	1.4785	1.4879
2039-86-3	1.59	1.5826
769-92-6	1.538	1.5283
3814-34-4	1.451	1.4411
4654-39-1	1.574	1.5853
70568-60-4	1.465	1.4598
3970-13-6	1.58	1.5791
452-62-0	1.5305	1.5472
10563-26-5	1.4915	1.4931
25245-34-5	1.57	1.5475
6795-87-5	1.371	1.3796
6294-17-3	1.4815	1.4647
2113-57-7	1.64	1.639
2252-44-0	1.4605	1.4918
1000-50-6	1.419	1.4159
5332-25-2	1.6625	1.6505
62356-27-8	1.5785	1.5886
583-04-0	1.5175	1.5259
7073-94-1	1.541	1.5436
22809-37-6	1.489	1.4759
2655-84-7	1.5495	1.5505
89794-02-5	1.574	1.5886
2766-43-0	1.452	1.4613
1906-95-2	1.46	1.4629
1573-17-7	1.4525	1.4537
2467-12-01	1.4365	1.4373
2695-47-8	1.465	1.4617
6972-79-8	1.549	1.5593
5315-25-3	1.5625	1.5683
161511-85-9	1.46	1.4717
13057-17-5	1.4555	1.4225
16495-03-7	1.494	1.5061
98190-85-3	1.455	1.4487
371-27-7	1.3465	1.3585
3768-58-9	1.418	1.4294
25017-13-4	1.5345	1.5341
161511-90-6	1.46	1.4717
19692-45-6	1.523	1.513
16495-13-9	1.5185	1.5176
6271-23-4	1.462	1.4598
55099-31-5	1.462	1.4593
6436-90-4	1.506	1.519
128259-47-2	1.558	1.5618
28788-62-7	1.535	1.5235
79887-09-5	1.5275	1.5219
28598-81-4	1.461	1.4587
1833-31-4	1.5095	1.498
2264-01-09	1.392	1.381
33733-73-2	1.627	1.6243
6320-01-0	1.6335	1.648
52287-51-1	1.589	1.6104
31930-34-4	1.481	1.4828
100-52-7	1.5455	1.5392
2905-24-0	1.592	1.6006
1422-54-4	1.532	1.5472
13472-85-0	1.555	1.5596
111-32-0	1.426	1.4097
95656-86-3	1.447	1.453
1458-98-6	1.47	1.454
7617-93-8	1.436	1.4442
82985-35-1	1.432	1.4288
330-93-8	1.5365	1.5599
766-11-0	1.532	1.5524
141-18-4	1.443	1.445
454-78-4	1.499	1.517
387834-41-5	1.47	1.4667
60789-54-0	1.529	1.526
480452-05-9	1.4575	1.4588
57443-18-2	1.506	1.5005
1462-37-9	1.541	1.5386
1014-93-3	1.524	1.5212
3430-22-6	1.5625	1.5683
34421-94-8	1.5125	1.5219
17739-45-6	1.4805	1.4772
107481-28-7	1.459	1.4599
393-37-3	1.462	1.4784
5433-01-02	1.537	1.5436
4532-64-3	1.52	1.5077
69985-32-6	1.526	1.5305
85418-23-1	1.528	1.5305
42969-65-3	1.426	1.4311
85068-32-2	1.423	1.4255
513-49-5	1.393	1.4077
147081-44-5	1.471	1.4806
930-96-1	1.638	1.6168
13048-33-4	1.458	1.4582
1830-78-0	1.472	1.4659
29578-39-0	1.538	1.5403
1996-30-1	1.555	1.5768
38749-79-0	1.561	1.5683
59907-12-9	1.5325	1.5472
68141-13-9	1.584	1.5575
54932-72-8	1.575	1.5886
98130-56-4	1.537	1.5682
14804-38-7	1.545	1.5476
27139-97-5	1.574	1.5886
63930-17-6	1.62	1.6437
201849-15-2	1.553	1.5768
467435-07-0	1.506	1.517
7137-55-5	1.522	1.5194
202865-73-4	1.629	1.6491
701-07-5	1.538	1.5381
887267-47-2	1.506	1.5238
433-95-4	1.394	1.3981
13319-71-6	1.57	1.6072
31608-22-7	1.48	1.4754
166330-03-6	1.454	1.4516
18401-43-9	1.446	1.4619
25121-83-9	1.687	1.7036
38771-21-0	1.481	1.4741
102-11-4	1.511	1.524
2648-71-7	1.461	1.4541
4799-68-2	1.517	1.5181
2549-99-7	1.464	1.4736
51826-90-5	1.441	1.4337
72658-10-7	1.419	1.4275
57699-45-3	1.533	1.5091
39482-87-6	1.386	1.3794
20487-40-5	1.393	1.4116
37526-88-8	1.52	1.5197
6999-03-07	1.53	1.5193
28588-75-2	1.577	1.6074
16654-74-3	1.415	1.4141
104540-42-3	1.471	1.4784
104197-14-0	1.5095	1.5203
351003-21-9	1.466	1.4784
10193-95-0	1.51	1.5109
73918-56-6	1.575	1.5863
2937-99-7	1.529	1.527
62563-07-9	1.48	1.4681
55289-36-6	1.618	1.6073
37669-64-0	1.596	1.6023
23877-12-5	1.437	1.4562
21524-34-5	1.523	1.5126
28229-69-8	1.576	1.5853
29578-83-4	1.558	1.5539
819-97-6	1.402	1.4145
29681-57-0	1.402	1.3962
28170-07-2	1.551	1.5777
118736-04-2	1.483	1.4727
1572-84-5	1.445	1.4532
148173-18-6	1.549	1.5493
35779-04-5	1.57	1.5712
4144-22-3	1.478	1.4994
174913-09-8	1.588	1.5799
45791-36-4	1.569	1.582
17247-58-4	1.481	1.4676
139100-06-4	1.51	1.5127
109-19-3	1.409	1.4193
36178-05-9	1.539	1.5524
145543-83-5	1.521	1.5263
172514-63-5	1.52	1.5263
458-50-4	1.543	1.5403
5414-19-7	1.514	1.4892
40161-54-4	1.46	1.4784
175278-17-8	1.504	1.5238
105529-58-6	1.448	1.4754
211737-28-9	1.528	1.5368
3760-95-0	1.3835	1.3896
351003-51-5	1.58	1.5794
166281-37-4	1.532	1.5682
41563-69-3	1.6235	1.6165
160096-76-4	1.59	1.5934
30752-19-3	1.524	1.5234
37909-95-8	1.578	1.5634
590-97-6	1.453	1.4468
65185-58-2	1.577	1.5863
36840-85-4	1.457	1.4575
31954-27-5	1.438	1.4445
581-46-4	1.625	1.6043
21075-83-2	1.436	1.4555
37942-69-1	1.46	1.4646
24623-65-2	1.543	1.5367
15803-02-8	1.529	1.5561
5369-19-7	1.541	1.5283
3878-41-9	1.577	1.5796
365547-20-2	1.545	1.5356
7148-74-5	1.479	1.4756
85483-97-2	1.511	1.5149
73522-17-5	1.438	1.43
49851-55-0	1.612	1.6087
875664-38-3	1.508	1.5259
71432-55-8	1.426	1.4432
1204-60-0	1.631	1.61
191602-54-7	1.512	1.5238
327-75-3	1.436	1.4442
5921-80-2	1.416	1.4224
1892-29-1	1.569	1.5808
53119-60-1	1.567	1.5918
254454-54-1	1.511	1.5221
105-84-0	1.452	1.4604
591-68-4	1.412	1.4215
1809-10-5	1.444	1.4376
56423-63-3	1.579	1.5794
86318-61-8	1.421	1.4237
99725-44-7	1.5295	1.5409
6186-22-7	1.558	1.5601
6911-87-1	1.613	1.5898
355135-07-8	1.555	1.5409
144012-09-9	1.514	1.5186
34737-89-8	1.533	1.5448
186590-26-1	1.54	1.5682
4457-67-4	1.453	1.4395
102684-91-3	1.512	1.5115
52997-43-0	1.462	1.4552
1085181-82-3	1.574	1.5758
306769-48-2	1.553	1.5522
1005-67-0	1.445	1.4569
41731-23-1	1.575	1.5907
4712-51-0	1.456	1.4423
2495-35-4	1.517	1.5259
79387-71-6	1.603	1.6278
25574-11-2	1.564	1.5718
2905-56-8	1.526	1.5446
51605-97-1	1.577	1.5726
57883-25-7	1.547	1.548
51012-65-8	1.581	1.5601
129112-25-0	1.479	1.5069
14719-37-0	1.437	1.4464
73323-65-6	1.453	1.4651
188345-71-3	1.471	1.5009
663949-34-6	1.515	1.5185
1423-61-6	1.662	1.674
18246-28-1	1.535	1.5294
91599-81-4	1.548	1.5621
4422-32-6	1.644	1.64
95798-23-5	1.544	1.5588
19851-44-6	1.504	1.5183
4753-59-7	1.461	1.4538
45676-04-8	1.482	1.4795
78592-82-2	1.43	1.4298
136239-66-2	1.467	1.4679
62327-21-3	1.433	1.4301
116557-46-1	1.545	1.5971
153086-78-3	1.459	1.4592
10029-07-9	1.489	1.4919
76782-82-6	1.429	1.4268
2051-49-2	1.428	1.4382
99-91-2	1.5545	1.5455
105-58-8	1.385	1.3962
616-38-6	1.369	1.3699
97-97-2	1.414	1.401
590-02-3	1.429	1.4291
99-02-5	1.55	1.5455
95-51-2	1.589	1.5923
623-12-1	1.536	1.5336
618-46-2	1.569	1.5732
122-01-0	1.579	1.5732
78-86-4	1.3965	1.3999
4170-24-5	1.4385	1.4457
542-18-7	1.4625	1.4563
112-52-7	1.4425	1.4388
622-24-2	1.53	1.5276
4091-39-8	1.4215	1.4144
110-75-8	1.438	1.4236
629-06-1	1.426	1.4238
544-10-5	1.42	1.4186
625-99-0	1.631	1.6485
3391-10-04	1.5435	1.5546
594-36-5	1.405	1.4123
513-36-0	1.398	1.3999
563-47-3	1.427	1.4185
90-13-1	1.633	1.6231
118-83-2	1.498	1.4943
2473-01-0	1.434	1.4314
543-59-9	1.413	1.412
622-61-7	1.526	1.5255
540-54-5	1.3885	1.3916
96-24-2	1.481	1.461
627-30-5	1.4465	1.4279
107-05-1	1.415	1.4159
542-76-7	1.438	1.418
626-60-8	1.533	1.5445
2039-87-4	1.564	1.5552
1073-67-2	1.566	1.5552
108-41-8	1.522	1.5405
87-60-5	1.589	1.5785
98-15-7	1.4455	1.4691
75-77-4	1.3875	1.3956
104-82-5	1.534	1.5312
615-20-3	1.6375	1.6481
615-60-1	1.528	1.5347
617-54-9	1.4475	1.4411
77-93-0	1.442	1.4572
1759-53-1	1.4385	1.4495
7299-91-4	1.4325	1.4386
623-43-8	1.425	1.4254
4786-20-3	1.42	1.4283
5459-58-5	1.426	1.4276
105-34-0	1.418	1.4064
92-64-8	1.57	1.5472
1501-82-2	1.4855	1.4764
502-42-1	1.4615	1.4642
4630-82-4	1.444	1.4475
10138-59-7	1.452	1.458
2705-87-5	1.4605	1.4655
110-83-8	1.4465	1.4681
827-52-1	1.5255	1.5305
292-64-8	1.4585	1.4524
111-78-4	1.4935	1.5138
931-88-4	1.47	1.4811
120-92-3	1.4365	1.4298
3400-45-1	1.453	1.4622
89-98-5	1.566	1.5626
544-25-2	1.523	1.5655
563-52-0	1.416	1.4204
865-49-6	1.445	1.4487
542-81-4	1.4965	1.4791
1079-66-9	1.6355	1.6188
1002-69-3	1.437	1.4343
1719-57-9	1.4365	1.4223
90-42-6	1.489	1.4833
2549-51-1	1.444	1.4388
625-98-9	1.4945	1.5222
873-63-2	1.555	1.5726
4771-80-6	1.481	1.5087
352-33-0	1.495	1.5222
5452-35-7	1.4715	1.4807
2453-46-5	1.475	1.4703
98-82-8	1.491	1.5002
287-92-3	1.406	1.4129
502-44-3	1.463	1.4606
2244-16-8	1.499	1.4841
33758-34-8	1.428	1.4363
7452-59-7	1.4305	1.4389
57458-41-0	1.5725	1.5376
4399-47-7	1.4795	1.4677
535-13-7	1.417	1.421
930-30-3	1.481	1.4719
87-44-5	1.4985	1.4938
527-84-4	1.5005	1.4995
96-12-8	1.5525	1.5156
1679-07-8	1.49	1.4874
3385-21-5	1.4915	1.499
822-67-3	1.4865	1.4977
110-82-7	1.426	1.4325
4635-59-0	1.462	1.4478
3153-36-4	1.431	1.4291
100-45-8	1.4735	1.4883
2311-46-8	1.407	1.4193
2550-06-03	1.467	1.4649
1001-89-4	1.421	1.4212
124-48-1	1.544	1.5351
2344-80-1	1.417	1.4039
620-19-9	1.534	1.5312
5891-21-4	1.438	1.4249
1866-31-5	1.568	1.5395
100-50-5	1.472	1.4838
2182-55-0	1.454	1.4529
1003-03-8	1.4495	1.4531
638-28-8	1.416	1.4158
98-12-4	1.479	1.4799
4704-31-8	1.436	1.4414
14861-06-4	1.45	1.4502
3098-92-8	1.588	1.547
53398-86-0	1.437	1.447
638-07-3	1.452	1.4404
1655-07-8	1.4785	1.4598
31501-11-8	1.437	1.447
3518-65-8	1.491	1.4583
24468-13-1	1.4315	1.4368
470-82-6	1.4575	1.4531
637-07-0	1.5025	1.5117
18928-91-1	1.444	1.4519
670-80-4	1.5145	1.5146
6837-24-7	1.4985	1.4951
15111-56-5	1.4565	1.4734
6197-30-4	1.567	1.5451
558-42-9	1.439	1.4343
772-79-2	1.5405	1.5688
2516-33-8	1.4325	1.4285
765-43-5	1.424	1.4177
3481-02-05	1.5535	1.5412
13361-31-4	1.423	1.4248
368-77-4	1.458	1.4676
14633-54-6	1.582	1.5904
1120-57-6	1.436	1.429
5407-98-7	1.548	1.533
6299-73-6	1.471	1.4864
936-52-7	1.513	1.5096
15721-27-4	1.546	1.5517
627-11-2	1.447	1.4425
50893-36-2	1.4125	1.4205
4606-07-09	1.42	1.4243
4755-77-5	1.4165	1.4321
515-40-2	1.525	1.5149
497-23-4	1.47	1.4676
1572-99-2	1.414	1.4192
6193-47-1	1.584	1.5568
104-86-9	1.5585	1.5744
14508-49-7	1.536	1.5401
67-66-3	1.4455	1.4487
1121-22-8	1.4885	1.499
156-41-2	1.548	1.561
377085-57-9	1.453	1.4581
42144-78-5	1.5165	1.5218
2845-89-8	1.535	1.5336
17216-62-5	1.436	1.443
3399-73-3	1.4865	1.4942
2106-02-07	1.5545	1.5647
18171-19-2	1.4275	1.4155
10503-96-5	1.4215	1.4182
627-42-9	1.408	1.3929
6872-17-9	1.592	1.5653
593-71-5	1.5825	1.5421
6284-46-4	1.4235	1.4323
4542-47-6	1.471	1.4754
40560-29-0	1.4125	1.4089
17249-80-8	1.5525	1.5716
70905-45-2	1.453	1.4328
18156-15-5	1.446	1.4298
7549-37-3	1.4545	1.4479
10226-28-5	1.48	1.4664
4755-81-1	1.447	1.4335
452-73-3	1.499	1.5184
35543-25-0	1.4615	1.4677
2687-12-09	1.5835	1.5516
6609-64-9	1.448	1.4514
919-31-3	1.413	1.4219
623-49-4	1.382	1.4064
35573-93-4	1.42	1.4204
623-71-2	1.4255	1.4242
41302-05-0	1.46	1.4561
51076-95-0	1.4225	1.4263
585-32-0	1.5195	1.5322
589-66-2	1.429	1.4359
35466-83-2	1.406	1.4138
2568-30-1	1.449	1.4339
10226-30-9	1.4435	1.43
76513-69-4	1.436	1.4157
623-53-0	1.378	1.3851
13361-36-9	1.4385	1.4235
90282-99-8	1.5345	1.5235
1558-33-4	1.4495	1.4424
26782-74-1	1.442	1.4451
28659-81-6	1.442	1.4478
29617-66-1	1.4345	1.4416
6939-95-3	1.5435	1.5546
13078-80-3	1.5515	1.561
5535-49-9	1.584	1.5791
22128-62-7	1.428	1.4378
15267-95-5	1.41	1.4194
14794-32-2	1.4455	1.4474
5197-62-6	1.4575	1.4395
6280-87-1	1.4465	1.432
5493-45-8	1.4855	1.484
1116-98-9	1.419	1.4277
5949-05-03	1.4465	1.4424
383-62-0	1.357	1.3789
1436-59-5	1.494	1.499
38051-57-9	1.4405	1.4345
293-96-9	1.4715	1.4553
4151-97-7	1.4465	1.4291
14753-05-0	1.4205	1.4158
23996-25-0	1.507	1.5001
7355-58-0	1.476	1.4483
2227-29-4	1.4285	1.4121
2528-00-9	1.5125	1.4879
157141-27-0	1.502	1.4529
2834-23-3	1.348	1.3861
452-75-5	1.498	1.5184
78068-85-6	1.4345	1.4526
14267-92-6	1.443	1.4406
17159-79-4	1.458	1.4598
18295-64-2	1.4605	1.4576
123-04-6	1.432	1.4256
5913-13-3	1.462	1.464
2158-31-8	1.5025	1.4979
1735-84-8	1.4345	1.4503
17435-77-7	1.45	1.4414
5781-53-3	1.4185	1.4258
1871-57-4	1.477	1.4494
4352-42-5	1.4655	1.4598
52196-74-4	1.5285	1.5129
2037-31-2	1.603	1.6172
1514-87-0	1.3495	1.3651
937-64-4	1.5935	1.6434
2106-05-0	1.56	1.5647
34125-84-3	1.5815	1.5824
68052-10-8	1.5065	1.5003
83846-48-4	1.621	1.6292
82491-60-9	1.4495	1.4492
7335-27-5	1.525	1.5311
73246-45-4	1.418	1.4141
766-66-5	1.488	1.4832
617-90-3	1.4785	1.4819
18368-63-3	1.528	1.5369
16523-54-9	1.532	1.5044
697-83-6	1.4405	1.4627
7335-25-3	1.5235	1.5311
18217-00-0	1.5365	1.5192
591-97-9	1.436	1.4371
5048-50-0	1.458	1.4759
502-47-6	1.4535	1.4571
40244-90-4	1.4745	1.4447
90866-33-4	1.453	1.4491
57486-68-7	1.526	1.5311
32804-77-6	1.434	1.4269
99464-83-2	1.456	1.4628
1575-61-7	1.464	1.4503
2888-06-04	1.568	1.5753
60456-22-6	1.435	1.4421
14345-97-2	1.54	1.5594
3967-54-2	1.454	1.4465
18368-76-8	1.532	1.5369
1191-95-3	1.423	1.4122
3587-62-0	1.4675	1.4555
106-71-8	1.445	1.4409
707-36-8	1.496	1.5032
628-11-5	1.449	1.4459
3678-62-4	1.5275	1.5369
6640-27-3	1.552	1.5769
2403-61-4	1.494	1.504
36215-07-3	1.413	1.4038
17733-22-1	1.606	1.5978
42330-88-1	1.458	1.455
52944-34-0	1.513	1.5239
772-49-6	1.436	1.4664
54053-45-1	1.439	1.4457
4525-75-1	1.517	1.5391
85070-48-0	1.545	1.5389
95-66-9	1.524	1.5347
31166-44-6	1.546	1.5637
5382-18-3	1.49	1.4829
38361-37-4	1.48	1.4987
450-89-5	1.5205	1.5128
202925-08-4	1.5115	1.5128
79455-63-3	1.527	1.5511
3570-58-9	1.457	1.4336
6099-88-3	1.557	1.5514
50528-86-4	1.49	1.498
57044-24-3	1.435	1.4421
1768-64-5	1.462	1.452
17865-54-2	1.433	1.4321
1480-65-5	1.499	1.5171
25026-34-0	1.551	1.5604
872-49-1	1.513	1.5202
66107-36-6	1.458	1.4855
6740-85-8	1.548	1.5471
2516-47-4	1.43	1.4409
81778-09-8	1.566	1.5629
103-56-0	1.534	1.5229
4524-93-0	1.463	1.4589
75484-32-1	1.44	1.4373
103-61-7	1.528	1.5182
937-55-3	1.445	1.4495
23144-52-7	1.459	1.447
5570-77-4	1.469	1.4765
33034-67-2	1.447	1.4559
3034-52-4	1.551	1.5689
192702-01-5	1.568	1.5629
26675-46-7	1.299	1.2986
1435-43-4	1.468	1.4987
13473-01-3	1.525	1.5298
59719-74-3	1.488	1.4748
7693-45-0	1.534	1.565
351003-48-0	1.556	1.5548
81565-18-6	1.45	1.4628
1813-33-8	1.484	1.4912
3970-40-9	1.558	1.5625
35180-01-9	1.413	1.4205
2905-23-9	1.577	1.5753
3637-61-4	1.458	1.447
72537-17-8	1.433	1.4458
157499-19-9	1.449	1.4442
345-18-6	1.551	1.5482
150322-73-9	1.517	1.5165
34683-73-3	1.524	1.5028
18113-04-7	1.564	1.5678
22651-87-2	1.476	1.4865
34328-46-6	1.504	1.4876
4442-85-7	1.465	1.4671
26772-34-9	1.491	1.499
26391-06-0	1.466	1.4479
33657-49-7	1.42	1.4242
42518-98-9	1.606	1.5935
148-69-6	1.549	1.5237
14123-60-5	1.536	1.5365
5182-44-5	1.55	1.5588
63799-11-1	1.594	1.5636
40889-91-6	1.473	1.4987
13078-79-0	1.549	1.561
2082-66-8	1.59	1.6082
17228-69-2	1.54	1.5298
16686-11-6	1.453	1.4421
2401-24-3	1.588	1.5697
49844-90-8	1.601	1.5964
622-98-0	1.517	1.5312
87100-15-0	1.448	1.451
932-32-1	1.58	1.5618
202522-23-4	1.537	1.5514
261723-26-6	1.536	1.5514
4254-02-08	1.443	1.4399
54788-38-4	1.534	1.5288
6848-13-1	1.576	1.545
851228-26-7	1.501	1.4932
5708-19-0	1.48	1.5087
2212-10-04	1.415	1.4155
112-18-5	1.4365	1.4407
493-02-7	1.4695	1.4756
124-18-5	1.4115	1.4177
5933-87-9	1.432	1.4376
30673-36-0	1.4305	1.4358
110-38-3	1.425	1.4313
872-05-9	1.4215	1.4293
112-30-1	1.437	1.4344
2016-57-1	1.4365	1.4395
2456-28-2	1.44	1.4399
124-02-7	1.4405	1.454
612-17-9	1.563	1.5911
134-62-3	1.5225	1.5171
462-94-2	1.4585	1.4559
109-76-2	1.458	1.4516
112-51-6	1.4905	1.4961
103-49-1	1.5755	1.5914
583-53-9	1.6115	1.6332
533-98-2	1.5145	1.4894
110-52-1	1.519	1.4934
557-91-5	1.513	1.4977
540-49-8	1.542	1.5556
74-95-3	1.5415	1.5118
109-64-8	1.522	1.4975
96-13-9	1.56	1.5264
111-92-2	1.418	1.4278
613-29-6	1.519	1.5
110-06-5	1.49	1.5006
2162-98-3	1.4605	1.4492
693-13-0	1.4325	1.4284
2207-04-07	1.421	1.4348
81-20-9	1.521	1.5361
694-83-7	1.49	1.499
2050-92-2	1.427	1.4343
824-55-5	1.5395	1.527
27132-23-6	1.4275	1.4296
79-43-6	1.4655	1.4756
79-36-7	1.4605	1.4694
541-73-1	1.546	1.5716
1190-22-3	1.4435	1.4304
7581-97-7	1.4425	1.4269
764-41-0	1.489	1.4665
75-78-5	1.404	1.4161
80-10-4	1.581	1.5831
75-35-4	1.425	1.4417
156-60-5	1.4455	1.4662
124-70-9	1.4295	1.4394
628-76-2	1.4565	1.438
142-28-9	1.4475	1.4284
96-23-1	1.4835	1.4571
542-75-6	1.471	1.4664
3674-09-07	1.454	1.4424
611-19-8	1.559	1.5576
95-75-0	1.547	1.5614
2049-73-2	1.51	1.4955
105-57-7	1.381	1.3912
462-95-3	1.3715	1.384
4043-59-8	1.4205	1.4194
109-89-7	1.385	1.4022
622-93-5	1.4445	1.442
91-66-7	1.5415	1.5134
141-93-5	1.495	1.5027
88-10-8	1.45	1.447
91-65-6	1.4535	1.458
111-40-0	1.484	1.4826
764-99-8	1.447	1.4331
112-15-2	1.4215	1.4164
89-91-8	1.405	1.394
617-84-5	1.4345	1.4259
530-40-5	1.525	1.5162
55-18-5	1.438	1.4164
1114-51-8	1.441	1.4311
606-46-2	1.5055	1.5116
28469-92-3	1.5745	1.5734
532-34-3	1.48	1.4774
110-87-2	1.441	1.4641
627-31-6	1.641	1.5984
110-96-3	1.409	1.423
2078-54-8	1.514	1.5121
2524-04-01	1.472	1.501
534-15-6	1.367	1.3681
109-87-5	1.3545	1.354
2044-64-6	1.471	1.4385
120-65-0	1.532	1.5464
3179-63-3	1.436	1.435
121-69-7	1.558	1.5253
95-68-1	1.559	1.5494
87-62-7	1.561	1.5494
10072-05-6	1.5575	1.523
103-83-3	1.5005	1.5187
79-29-8	1.3755	1.3865
108-09-8	1.408	1.4195
2207-01-04	1.436	1.4348
583-57-3	1.435	1.4348
589-90-2	1.4245	1.4348
3809-32-3	1.459	1.4549
766-20-1	1.414	1.4234
100-79-8	1.4345	1.4432
108-00-9	1.4265	1.4393
625-86-5	1.441	1.4568
108-82-7	1.423	1.4244
627-58-7	1.4285	1.4282
107-54-0	1.435	1.4476
6485-55-8	1.446	1.4511
86-56-6	1.6225	1.5896
2524-03-0	1.487	1.5104
108-08-7	1.381	1.3956
106-58-1	1.4465	1.4771
758-96-3	1.44	1.421
121-72-2	1.551	1.5218
7560-83-0	1.4895	1.485
29956-99-8	1.5	1.4866
123-91-1	1.422	1.416
77-25-8	1.424	1.4353
530-48-3	1.609	1.5948
100-18-5	1.49	1.4912
142-84-7	1.404	1.4181
25265-71-8	1.4405	1.4417
1321-74-0	1.5605	1.5425
112-55-0	1.459	1.4589
112-41-4	1.43	1.435
3511-19-1	1.487	1.4616
765-03-7	1.4345	1.4402
571-58-4	1.614	1.5835
37910-77-3	1.455	1.4565
1605-53-4	1.546	1.5187
10496-16-9	1.4845	1.4894
34590-94-8	1.422	1.422
638-04-0	1.4225	1.4348
2532-58-3	1.409	1.4208
760-23-6	1.4655	1.4508
83-41-0	1.544	1.5361
1654-86-0	1.442	1.4443
2680-03-07	1.474	1.4407
335-99-9	1.3175	1.2868
3010-02-04	1.425	1.433
4279-22-5	1.43	1.434
95-50-1	1.5515	1.5716
24083-16-7	1.5155	1.494
616-39-7	1.389	1.408
10496-18-1	1.4815	1.4837
768-33-2	1.5085	1.501
1467-79-4	1.4095	1.4122
2155-94-4	1.4005	1.4266
558-37-2	1.3765	1.409
3195-24-2	1.446	1.4588
5666-17-1	1.4195	1.4357
2384-70-5	1.4345	1.441
2384-86-3	1.4335	1.441
19780-12-2	1.4385	1.4451
19550-56-2	1.436	1.4411
1656-94-6	1.583	1.5901
2213-23-2	1.4035	1.4087
4032-86-4	1.408	1.4133
926-82-9	1.4055	1.4087
4110-44-5	1.415	1.4178
15869-95-1	1.4145	1.4178
590-73-8	1.3935	1.4078
592-13-2	1.3925	1.4028
583-48-2	1.404	1.4028
1795-16-0	1.452	1.452
3055-93-4	1.448	1.4441
16746-87-5	1.412	1.4149
3404-77-1	1.4075	1.4213
3404-72-6	1.403	1.4086
762-62-9	1.392	1.4159
4914-91-4	1.4105	1.4175
19549-87-2	1.4175	1.4199
19550-75-5	1.412	1.433
4117-14-0	1.4575	1.4595
5339-01-05	1.562	1.5349
51721-39-2	1.458	1.4595
932-51-4	1.446	1.4462
5465-09-08	1.453	1.4462
15799-79-8	1.559	1.5171
104-79-0	1.4295	1.4414
6006-65-1	1.408	1.4258
36805-97-7	1.4135	1.4317
3001-72-7	1.5195	1.5156
320-50-3	1.4825	1.4925
624-95-3	1.4135	1.4175
25260-60-0	1.444	1.4474
56106-37-7	1.501	1.4908
4481-30-5	1.491	1.4909
933-40-4	1.439	1.4382
2051-31-2	1.433	1.4323
4437-20-1	1.589	1.6016
6863-58-7	1.394	1.4031
626-87-9	1.509	1.4868
19398-53-9	1.4975	1.4834
1081-75-0	1.5575	1.5692
713-95-1	1.46	1.4537
705-86-2	1.458	1.4512
612-75-9	1.595	1.5843
29682-41-5	1.646	1.6603
29898-32-6	1.6465	1.6603
30280-35-4	1.4235	1.4302
1888-57-9	1.407	1.4123
13829-21-5	1.451	1.4549
927-62-8	1.3975	1.4152
4484-72-4	1.454	1.4563
626-13-1	1.6225	1.5968
3529-09-07	1.444	1.4527
867-13-0	1.431	1.43
5910-89-4	1.506	1.5024
821-10-3	1.5055	1.4775
45103-58-0	1.4395	1.4294
624-16-8	1.4245	1.4258
1746-11-8	1.531	1.5407
3140-93-0	1.6315	1.6616
2182-66-3	1.402	1.4137
996-35-0	1.391	1.4049
112-69-6	1.4445	1.4459
2305-05-07	1.4525	1.4475
15707-24-1	1.499	1.4941
7439-68-1	1.455	1.4517
17477-29-1	1.4135	1.4105
18479-51-1	1.454	1.4505
4909-78-8	1.4115	1.4361
626-23-3	1.4115	1.423
2550-40-5	1.547	1.5489
372-18-9	1.4375	1.4677
540-36-3	1.442	1.4677
367-30-6	1.513	1.5138
446-35-5	1.513	1.5009
6175-45-7	1.4995	1.4949
693-54-9	1.4255	1.4258
20462-00-4	1.54	1.5529
18871-66-4	1.409	1.415
1502-24-5	1.468	1.4549
1862-07-3	1.448	1.4445
590-35-2	1.382	1.401
1118-71-4	1.459	1.4368
36075-06-6	1.54	1.5099
22323-82-6	1.434	1.4432
628-21-7	1.621	1.5819
38711-20-5	1.408	1.4122
690-92-6	1.411	1.4294
2568-90-3	1.406	1.4129
18138-04-0	1.4965	1.4941
605-39-0	1.5745	1.5843
53963-03-4	1.4565	1.4623
16387-71-6	1.4915	1.4686
17587-22-3	1.38	1.3599
53369-71-4	1.436	1.4481
95-00-1	1.578	1.5921
19398-47-1	1.5425	1.5181
24544-04-5	1.533	1.5151
1121-37-5	1.4675	1.455
127-21-9	1.331	1.3617
300-87-8	1.4415	1.4481
598-74-3	1.406	1.4128
1984-65-2	1.543	1.554
3845-76-9	1.4815	1.4674
543-82-8	1.4215	1.429
32768-54-0	1.5515	1.5614
7378-99-6	1.424	1.4321
776-76-1	1.571	1.5561
56456-47-4	1.4875	1.5019
112-75-4	1.441	1.4436
69385-30-4	1.4925	1.5072
452-10-8	1.469	1.4682
7424-91-1	1.4105	1.4023
328-84-7	1.4755	1.4925
89-74-7	1.5345	1.5175
72482-64-5	1.5165	1.5088
364-83-0	1.489	1.4842
116549-34-9	1.409	1.408
17094-34-7	1.432	1.4303
369-33-5	1.492	1.4842
6231-18-1	1.502	1.4979
369-34-6	1.509	1.5009
76649-16-6	1.437	1.447
10519-33-2	1.451	1.4447
14507-02-9	1.488	1.4748
14620-52-1	1.4305	1.4278
2217-07-04	1.527	1.5055
20821-66-3	1.604	1.5767
1003-38-9	1.4035	1.4137
10601-80-6	1.412	1.4187
64021-83-6	1.455	1.4668
3730-60-7	1.422	1.4252
19550-08-4	1.435	1.4252
1719-53-5	1.431	1.4272
2855-19-8	1.436	1.4366
3674-13-3	1.501	1.4955
7787-93-1	1.461	1.4474
32002-24-7	1.462	1.4361
104934-52-3	1.4885	1.4898
89686-69-1	1.4685	1.4558
1435-48-9	1.5255	1.5468
4659-45-4	1.56	1.5902
20407-84-5	1.458	1.4508
4637-24-5	1.3965	1.4054
3404-78-2	1.4145	1.4228
19074-24-9	1.452	1.4515
65016-55-9	1.49	1.4929
811-93-8	1.441	1.454
20461-99-8	1.5395	1.5514
628-77-3	1.6015	1.5691
868-84-8	1.548	1.5465
115651-77-9	1.5	1.503
43141-69-1	1.538	1.5172
4342-61-4	1.455	1.423
761-65-9	1.4435	1.4407
63721-05-1	1.423	1.4307
7127-19-7	1.568	1.5583
24772-63-2	1.564	1.5435
20348-51-0	1.427	1.436
603-69-0	1.47	1.4337
132883-44-4	1.465	1.4668
84494-72-4	1.493	1.5054
59293-67-3	1.604	1.612
814-49-3	1.417	1.4255
69045-84-7	1.4755	1.4876
6217-54-5	1.5045	1.521
822-86-6	1.49	1.4759
119-60-8	1.484	1.4819
107149-56-4	1.438	1.4182
5312-73-2	1.4375	1.4338
81749-14-6	1.435	1.4397
543-75-9	1.437	1.4591
57074-37-0	1.4515	1.4537
22429-12-5	1.5665	1.5738
3052-61-7	1.6185	1.6015
5507-44-8	1.4	1.4133
1185-39-3	1.421	1.4343
54551-83-6	1.541	1.5478
15441-06-2	1.507	1.5133
123266-59-1	1.634	1.6462
34036-07-2	1.5	1.492
10061-02-6	1.4745	1.4664
18407-07-3	1.45	1.447
4442-41-5	1.568	1.5771
5124-30-1	1.497	1.501
1004-66-6	1.503	1.5058
15764-16-6	1.55	1.5282
26549-22-4	1.4345	1.4396
74181-34-3	1.432	1.4436
7429-37-0	1.5525	1.5282
85118-05-4	1.4895	1.5019
40458-98-8	1.567	1.5428
1975-78-6	1.43	1.4302
1014-60-4	1.488	1.4915
55387-85-4	1.45	1.4429
1706-11-2	1.5135	1.5058
629-09-4	1.586	1.5588
102-49-8	1.579	1.5921
88754-66-9	1.4155	1.4154
60956-23-2	1.599	1.6153
18395-90-9	1.457	1.4394
16696-65-4	1.493	1.4805
947-91-1	1.591	1.5901
6362-80-7	1.569	1.5583
2476-37-1	1.561	1.5639
1113-12-8	1.441	1.4301
348-59-4	1.525	1.5468
148992-43-2	1.369	1.3527
565-53-7	1.464	1.4807
4834-98-4	1.468	1.465
16139-79-0	1.534	1.5536
24599-58-4	1.523	1.5017
719-80-2	1.59	1.5813
64248-58-4	1.5585	1.5798
35112-27-7	1.539	1.5478
4253-89-8	1.491	1.5022
4519-40-8	1.514	1.5138
85068-30-0	1.4845	1.4822
1979-36-8	1.488	1.4842
2646-91-5	1.499	1.492
57987-55-0	1.461	1.4452
108549-23-1	1.532	1.5435
13360-57-1	1.4515	1.4559
141776-91-2	1.52	1.5223
2646-90-4	1.4985	1.492
52480-43-0	1.5305	1.481
666-40-0	1.4115	1.426
7206-28-2	1.433	1.4407
18037-39-3	1.4515	1.443
824-45-3	1.5375	1.527
3709-08-08	1.432	1.4342
1158830-31-9	1.443	1.4173
34819-86-8	1.4555	1.4727
20017-67-8	1.583	1.5853
7367-88-6	1.4455	1.447
4815-57-0	1.49	1.4964
141546-96-5	1.402	1.4103
10061-01-5	1.47	1.4664
18063-02-0	1.5	1.5088
10575-25-4	1.4785	1.4745
6336-58-9	1.44	1.4513
1131-16-4	1.572	1.5772
1550-35-2	1.499	1.492
29823-87-8	1.4515	1.4483
25676-62-4	1.595	1.5815
35112-28-8	1.555	1.557
111-89-7	1.407	1.4015
14920-89-9	1.443	1.4568
2368-53-8	1.487	1.5035
13498-14-1	1.477	1.5017
5702-16-9	1.462	1.4466
35364-79-5	1.5645	1.5762
52516-13-9	1.568	1.5776
21581-45-3	1.567	1.5776
13918-92-8	1.518	1.5161
145758-05-0	1.515	1.5161
2973-10-06	1.409	1.4185
57806-76-5	1.5235	1.5153
119818-40-5	1.486	1.4948
1067-87-4	1.434	1.431
59025-55-7	1.492	1.5054
26465-81-6	1.543	1.5452
1067-71-6	1.435	1.4273
3572-64-3	1.4725	1.4706
758-16-7	1.574	1.5344
683-85-2	1.505	1.4898
78342-42-4	1.462	1.4639
18791-02-1	1.542	1.5314
207226-31-1	1.507	1.5354
77237-55-9	1.4925	1.4893
62778-16-9	1.5	1.4947
5973-71-7	1.549	1.5282
3762-25-2	1.497	1.4947
3453-00-7	1.51	1.5006
90390-27-5	1.491	1.5072
4202-38-4	1.442	1.4437
437-82-1	1.4595	1.4682
131840-54-5	1.539	1.5387
72235-53-1	1.493	1.5072
25340-17-4	1.4945	1.5027
34759-34-7	1.494	1.4912
16753-62-1	1.396	1.4018
35730-09-7	1.514	1.5088
2050-25-1	1.513	1.5096
391604-55-0	1.571	1.5644
3658-80-8	1.602	1.6128
2265-94-3	1.499	1.5009
656-35-9	1.482	1.493
141106-52-7	1.596	1.5956
22236-10-8	1.506	1.4946
5676-58-4	1.543	1.5458
66353-47-7	1.543	1.5451
57472-68-1	1.452	1.4531
60-29-7	1.353	1.3689
1435-53-6	1.583	1.6061
20781-20-8	1.549	1.5286
10299-35-1	1.423	1.4286
5779-95-3	1.537	1.5282
21524-39-0	1.488	1.497
68121-46-0	1.612	1.6125
19718-92-4	1.422	1.422
90965-06-3	1.4795	1.4367
6613-44-1	1.546	1.5397
1435-49-0	1.524	1.5468
335-48-8	1.352	1.3589
1513-62-8	1.351	1.3456
31543-75-6	1.601	1.6153
6336-45-4	1.419	1.4172
815-17-8	1.4295	1.4429
2049-70-9	1.419	1.4286
34034-87-2	1.448	1.4509
28178-42-9	1.519	1.5103
2941-71-1	1.607	1.5999
17249-90-0	1.555	1.5804
38186-51-5	1.525	1.5246
3205-35-4	1.454	1.4563
39718-32-6	1.495	1.5054
18880-04-1	1.607	1.6005
1687-29-2	1.459	1.4563
124931-12-0	1.455	1.4433
17351-07-4	1.453	1.458
105669-53-2	1.458	1.4505
682-30-4	1.43	1.4273
92779-72-1	1.542	1.5354
51851-79-7	1.402	1.4094
18027-45-7	1.442	1.4535
7208-05-01	1.434	1.4481
20306-22-3	1.475	1.48
14400-67-0	1.479	1.4579
119237-64-8	1.585	1.5891
644958-86-1	1.466	1.4681
111-33-1	1.439	1.4383
67536-29-2	1.526	1.5343
1073-13-8	1.4745	1.4805
91-67-8	1.5365	1.5116
866252-52-0	1.476	1.4601
121219-07-6	1.469	1.4681
116971-11-0	1.558	1.567
7283-69-4	1.443	1.4494
4013-94-9	1.429	1.4417
37885-41-9	1.553	1.5535
6346-09-04	1.429	1.4299
133113-76-5	1.561	1.568
123707-26-6	1.441	1.4407
1145-93-3	1.505	1.4924
3275-95-4	1.549	1.5286
1892-57-5	1.461	1.4527
85118-06-5	1.495	1.5072
193352-75-9	1.546	1.5786
452-67-5	1.452	1.4715
1583-59-1	1.444	1.5027
2927-34-6	1.45	1.4715
1132-95-2	1.443	1.4431
2987-16-8	1.397	1.409
3518-88-5	1.441	1.4481
359-13-7	1.334	1.2995
1013-76-9	1.555	1.5638
3140-92-9	1.632	1.6616
401-67-2	1.343	1.3173
20654-47-1	1.404	1.4172
84476-99-3	1.444	1.459
135926-94-2	1.557	1.5387
214493-03-5	1.595	1.5735
151213-40-0	1.5145	1.5164
321903-29-1	1.516	1.5134
55312-97-5	1.531	1.5322
1002-67-1	1.41	1.4018
111109-77-4	1.408	1.4036
42389-50-4	1.479	1.4802
1173788-58-3	1.49	1.4855
5943-34-0	1.538	1.5476
823-69-8	1.503	1.5041
2530-86-1	1.417	1.4208
18416-07-4	1.456	1.4498
185990-03-8	1.495	1.4791
65864-64-4	1.358	1.3443
86393-34-2	1.57	1.5691
126990-35-0	1.468	1.4491
3068-03-09	1.489	1.4803
2415-80-7	1.552	1.5655
1186-10-3	1.463	1.4544
14433-76-2	1.454	1.4438
114099-96-6	1.473	1.4657
1732-08-7	1.4315	1.4295
102-48-7	1.537	1.5395
654-01-3	1.481	1.493
93-48-1	1.536	1.5395
13989-82-7	1.427	1.433
995-82-4	1.393	1.4156
7218-43-1	1.459	1.4449
462-20-4	1.524	1.5247
3167-63-3	1.44	1.4298
145689-34-5	1.484	1.493
71885-51-3	1.448	1.4488
75853-18-8	1.49	1.5019
89402-42-6	1.388	1.4006
7382-32-3	1.418	1.4128
65100-04-1	1.433	1.4331
39890-98-7	1.474	1.4876
2339-78-8	1.577	1.5682
31301-45-8	1.498	1.4927
100442-33-9	1.545	1.5553
17980-32-4	1.417	1.4123
3999-55-1	1.44	1.443
66356-53-4	1.532	1.5373
83882-67-1	1.495	1.4733
75894-97-2	1.551	1.5565
401-84-3	1.52	1.5409
243863-36-7	1.49	1.4914
2683-57-0	1.453	1.4466
458-92-4	1.45	1.4574
21678-37-5	1.44	1.4237
6590-94-9	1.681	1.6709
1583-83-1	1.454	1.4617
16356-02-8	1.435	1.4242
3447-53-8	1.52	1.505
31618-90-3	1.5	1.502
2993-85-3	1.343	1.3225
74328-56-6	1.37	1.3403
360-92-9	1.38	1.379
10419-80-4	1.424	1.4184
104-68-7	1.525	1.5139
96-09-3	1.535	1.539
68443-63-0	1.422	1.4295
540-63-6	1.559	1.5356
594-44-5	1.454	1.4294
1001-26-9	1.45	1.4341
103-73-1	1.507	1.5038
617-78-7	1.393	1.3981
111-90-0	1.427	1.4166
628-32-0	1.3695	1.3826
110-73-6	1.4405	1.4342
103-69-5	1.5545	1.5306
589-16-2	1.5545	1.5455
16712-69-9	1.546	1.5408
97-95-0	1.422	1.4141
88-09-5	1.413	1.4265
107-15-3	1.457	1.4478
3386-87-6	1.449	1.4362
109-59-1	1.41	1.4064
149-57-5	1.425	1.4351
645-62-5	1.451	1.4397
123-05-7	1.416	1.4183
7098-07-09	1.4885	1.4839
133-13-1	1.4165	1.4273
104-90-5	1.498	1.5026
103-20-8	1.4445	1.438
1127-76-0	1.606	1.5803
118-44-5	1.6455	1.5949
100-12-9	1.5455	1.5326
816-79-5	1.4145	1.4204
620-17-7	1.5325	1.5424
84-72-0	1.499	1.5077
112-50-5	1.438	1.4258
536-78-7	1.5015	1.5038
352-93-2	1.4425	1.4516
102-27-2	1.5465	1.5265
611-14-3	1.503	1.507
622-96-8	1.495	1.507
78-07-9	1.391	1.4074
536-74-3	1.549	1.5523
1640-89-7	1.4195	1.4239
91-88-3	1.553	1.5314
4110-50-3	1.445	1.4537
2461-15-6	1.435	1.4314
874-41-9	1.504	1.5056
110-77-0	1.487	1.4831
87-13-8	1.462	1.4466
609-26-7	1.404	1.4028
5877-42-9	1.4505	1.4488
6285-06-09	1.438	1.4483
933-98-2	1.511	1.5056
934-74-7	1.4985	1.5056
110-72-5	1.439	1.4437
6291-85-6	1.4195	1.4191
2141-62-0	1.408	1.4017
13605-19-1	1.531	1.5274
1196-58-3	1.488	1.4937
1484-80-6	1.45	1.4583
3234-28-4	1.441	1.4406
7320-37-8	1.4455	1.4437
937-30-4	1.5295	1.5145
286-99-7	1.483	1.4696
4748-78-1	1.54	1.5247
3388-04-03	1.451	1.4463
13925-00-3	1.499	1.4983
760-67-8	1.433	1.4348
1945-84-2	1.56	1.5489
19961-27-4	1.391	1.408
2983-38-2	1.404	1.4145
2785-89-9	1.5285	1.5307
5308-25-8	1.4685	1.4816
15707-23-0	1.5035	1.4977
3760-20-1	1.465	1.4581
14794-31-1	1.437	1.4404
13444-24-1	1.478	1.4798
1795-01-3	1.515	1.5238
14321-27-8	1.5105	1.5232
61310-53-0	1.4535	1.4334
5441-51-0	1.4515	1.4492
94-04-2	1.4265	1.4348
10353-53-4	1.426	1.43
6290-24-0	1.511	1.5027
770-69-4	1.493	1.4843
3728-54-9	1.443	1.4381
3728-56-1	1.432	1.4381
622-38-8	1.5655	1.5661
111390-22-8	1.4725	1.471
381670-31-1	1.472	1.471
1515-95-3	1.5085	1.5027
16182-04-0	1.499	1.5291
86227-47-6	1.487	1.4974
1436-34-6	1.406	1.4111
938-54-5	1.445	1.4572
3208-16-0	1.4395	1.4527
27465-51-6	1.524	1.5097
381670-33-3	1.445	1.4572
39216-86-9	1.4525	1.4424
7381-30-8	1.4025	1.4071
597-05-7	1.438	1.4252
1498-51-7	1.434	1.4431
6780-49-0	1.527	1.5194
71672-75-8	1.533	1.5274
279-49-2	1.448	1.4493
7335-06-0	1.4305	1.4454
285-67-6	1.4345	1.4369
126-39-6	1.4085	1.4202
607-01-2	1.6125	1.5868
17689-77-9	1.412	1.4294
5328-01-08	1.602	1.5734
3047-32-3	1.4535	1.4421
644-21-3	1.569	1.5557
37059-57-7	1.562	1.5269
79887-11-9	1.519	1.513
13147-25-6	1.473	1.4454
5006-62-2	1.459	1.4682
1783-84-2	1.478	1.4879
766-49-4	1.524	1.5278
54589-54-7	1.53	1.5248
349-43-9	1.377	1.3739
4946-13-8	1.565	1.5686
64920-29-2	1.504	1.5097
4500-58-7	1.57	1.5686
625-60-5	1.459	1.4934
1968-40-7	1.416	1.4263
53399-81-8	1.416	1.428
72987-62-3	1.572	1.5538
152820-13-8	1.481	1.4824
1467-05-6	1.53	1.5239
126213-50-1	1.577	1.585
40307-11-7	1.54	1.5351
23138-50-3	1.526	1.5351
32459-62-4	1.5355	1.5296
25597-16-4	1.36	1.3792
1462-96-0	1.454	1.4531
27829-72-7	1.435	1.4386
5314-55-6	1.383	1.3897
58539-11-0	1.497	1.4925
285-69-8	1.447	1.428
39255-32-8	1.404	1.4145
5870-68-8	1.407	1.4145
124236-29-9	1.542	1.5341
1003-14-1	1.396	1.4021
15707-34-3	1.501	1.4973
21622-01-5	1.448	1.4643
15862-72-3	1.456	1.4682
20634-92-8	1.412	1.4253
49608-01-7	1.523	1.528
451-02-5	1.485	1.495
5166-67-6	1.45	1.465
14529-53-4	1.496	1.4988
39931-77-6	1.501	1.5035
7152-15-0	1.427	1.424
67237-53-0	1.578	1.5741
4739-94-0	1.523	1.5367
6413-10-01	1.433	1.4391
42195-97-1	1.459	1.464
20826-94-2	1.454	1.4515
42252-34-6	1.452	1.4441
6609-57-0	1.532	1.5243
615-83-8	1.449	1.4525
187148-77-2	1.598	1.5642
3938-96-3	1.4	1.3962
5744-40-1	1.481	1.4924
21188-61-4	1.422	1.4306
352-24-9	1.404	1.3799
10031-93-3	1.493	1.5003
79887-14-2	1.554	1.5295
160313-69-9	1.548	1.548
214262-85-8	1.498	1.51
928-55-2	1.398	1.4111
60683-30-9	1.431	1.4391
10488-87-6	1.509	1.5071
347389-74-6	1.432	1.4355
158816-55-8	1.474	1.4852
571-55-1	1.43	1.407
5751-83-7	1.562	1.5684
82954-89-0	1.412	1.4317
1522-46-9	1.424	1.4257
27834-99-7	1.535	1.5087
15971-92-3	1.465	1.461
22924-15-8	1.539	1.5195
33027-66-6	1.363	1.4023
10443-70-6	1.51	1.5107
160542-02-9	1.456	1.4735
1687-64-5	1.53	1.5365
7425-55-0	1.49	1.4936
17147-42-1	1.462	1.4664
459-72-3	1.376	1.3625
371-40-4	1.539	1.5401
95-52-3	1.4735	1.4924
352-32-9	1.469	1.4924
638-49-3	1.399	1.4088
592-84-7	1.389	1.4004
542-55-2	1.385	1.3972
107-31-3	1.344	1.3506
123-39-7	1.4325	1.4016
98-01-1	1.526	1.4761
98-00-0	1.4865	1.4889
109-94-4	1.361	1.3738
372-19-0	1.5455	1.5401
402-67-5	1.525	1.5242
141-02-6	1.4565	1.4559
627-63-4	1.499	1.4986
615-12-3	1.4715	1.4636
4695-62-9	1.463	1.4712
381670-34-4	1.4055	1.4126
453-18-9	1.3665	1.343
456-48-4	1.5175	1.5144
459-57-4	1.5205	1.5144
393-52-2	1.537	1.5299
372-47-4	1.4735	1.4845
446-48-0	1.551	1.5433
345-35-7	1.5145	1.5145
403-43-0	1.531	1.5299
371-49-3	1.3955	1.3876
446-10-6	1.5235	1.5201
394-47-8	1.5065	1.5207
24460-74-0	1.442	1.4462
459-60-9	1.488	1.4878
2591-86-8	1.4835	1.4761
352-34-1	1.583	1.6057
402-41-5	1.4995	1.5106
350-40-3	1.5115	1.5019
348-52-7	1.591	1.6057
501-00-8	1.502	1.5132
459-22-3	1.5005	1.5132
1121-86-4	1.5845	1.6057
455-36-7	1.5095	1.5032
685-88-1	1.406	1.4038
488-98-2	1.5435	1.5479
680-15-9	1.351	1.3615
456-19-9	1.526	1.529
367-86-2	1.462	1.455
443-82-3	1.485	1.4926
29548-30-9	1.477	1.4719
498-60-2	1.495	1.4761
150760-95-5	1.4065	1.4009
4412-91-3	1.485	1.4889
445-27-2	1.508	1.5032
456-47-3	1.51	1.5248
1514-26-7	1.553	1.5696
144977-47-9	1.519	1.5172
398-62-9	1.509	1.485
401-80-9	1.4	1.425
443-26-5	1.4915	1.495
452-71-1	1.5365	1.5333
403-33-8	1.4945	1.4986
27772-62-9	1.444	1.4175
701-16-6	1.5225	1.5304
2557-77-9	1.552	1.5698
403-41-8	1.5015	1.5129
450-93-1	1.5175	1.5224
446-22-0	1.504	1.4923
614-98-2	1.4605	1.4657
13129-23-2	1.4685	1.4654
63131-29-3	1.521	1.5031
393-09-9	1.462	1.455
694-82-6	1.445	1.4209
175205-39-7	1.61	1.6052
407-22-7	1.47	1.486
443-86-7	1.542	1.5333
452-80-2	1.533	1.5333
459-03-0	1.494	1.4989
100-82-3	1.515	1.5292
67515-60-0	1.4565	1.4485
57500-00-2	1.569	1.5808
655-20-9	1.56	1.5568
587-79-1	1.556	1.573
59020-85-8	1.519	1.5229
2369-19-9	1.472	1.486
372-46-3	1.415	1.4072
15894-04-9	1.546	1.5554
1978-39-8	1.544	1.5266
452-85-7	1.513	1.5292
404-72-8	1.621	1.6208
64-18-6	1.371	1.3689
67515-56-4	1.469	1.4651
503-20-8	1.333	1.3103
769-10-8	1.524	1.5201
29270-55-1	1.527	1.5319
38985-64-7	1.622	1.6208
39998-81-7	1.579	1.5913
24654-55-5	1.5985	1.5347
1883-78-9	1.505	1.5075
261951-71-7	1.549	1.5375
207981-46-2	1.468	1.4651
171243-30-4	1.462	1.4651
216144-70-6	1.463	1.4651
52059-53-7	1.508	1.517
141483-15-0	1.44	1.4548
135427-08-6	1.522	1.5117
63082-45-1	1.525	1.5117
701-83-7	1.48	1.4986
208173-24-4	1.454	1.4467
94239-04-0	1.403	1.4164
1583-88-6	1.508	1.5212
399-88-2	1.445	1.486
1003-32-3	1.5845	1.5572
404-70-6	1.5095	1.5212
2836-82-0	1.498	1.4989
456-24-6	1.526	1.5193
118078-66-3	1.401	1.4164
177596-38-2	1.436	1.4526
396-30-5	1.594	1.5826
106-24-1	1.476	1.4681
544-13-8	1.4355	1.4239
26446-35-5	1.447	1.4485
122-32-7	1.4695	1.4728
122-60-1	1.5305	1.5239
1119-40-0	1.4245	1.4214
96-35-5	1.4165	1.4052
930-37-0	1.411	1.391
10487-05-5	1.438	1.4377
68931-30-6	1.4885	1.4852
5146-66-7	1.475	1.4643
4016-14-2	1.411	1.408
65799-47-5	1.4325	1.4225
931-40-8	1.459	1.4527
64491-68-5	1.4055	1.391
65031-96-1	1.4275	1.4287
60456-23-7	1.433	1.4173
71031-02-2	1.531	1.5239
7785-33-3	1.482	1.4725
2461-18-9	1.444	1.4415
[truncated: 1,625 more rows]

## Sheet: Table S3
Table S3. Experimental and predicted values of the refractive index for the CRC test set.
Exp. = Experimental values from CRC catalog
GF = predicted GF values
CASRN	Exp.	GF
'4860-03-1	1.4503	1.445
'2550-04-1	1.4072	1.4211
'4454-05-1	1.442	1.4576
'3128-06-1	1.4451	1.4429
'3452-07-1	1.444	1.447
'2459-10-1	1.523	1.5168
'3637-01-2	1.5413	1.5175
'3699-01-2	1.6225	1.6319
'3680-02-2	1.4636	1.4254
'2867-05-2	1.4515	1.4735
'4445-07-2	1.479	1.4801
'3862-12-2	1.555	1.5766
'5406-12-2	1.525	1.5184
'4885-02-3	1.43	1.4156
'1932-04-3	1.4853	1.5025
'4829-04-3	1.5975	1.5956
'2550-06-3	1.4668	1.4649
'3240-09-3	1.4348	1.4228
'3452-09-3	1.4217	1.432
'3852-09-3	1.403	1.3962
'7642-09-3	1.3947	1.4188
'2207-01-4	1.436	1.4348
'4984-01-4	1.4212	1.425
'3010-02-4	1.426	1.433
'2870-04-4	1.5107	1.5056
'4038-04-4	1.3982	1.4128
'4169-04-4	1.476	1.5205
'2402-06-4	1.3713	1.3976
'2217-07-4	1.5271	1.5055
'7148-07-4	1.5128	1.5035
'2622-08-4	1.574	1.6006
'3180-09-4	1.518	1.5257
'6346-09-4	1.4275	1.4299
'3391-10-4	1.5505	1.5546
'4835-11-4	1.447	1.454
'2883-02-5	1.4519	1.451
'4313-03-5	1.5315	1.4691
'5390-04-5	1.4414	1.4418
'6225-06-5	1.4419	1.4311
'2052-07-5	1.6248	1.639
'4553-07-5	1.5012	1.5181
'4744-08-5	1.3924	1.3991
'5973-11-5	1.4452	1.4376
'3440-02-6	1.533	1.5413
'6094-02-6	1.4035	1.4114
'2207-03-6	1.4284	1.4348
'5911-04-6	1.4125	1.4156
'3657-07-6	1.4525	1.4689
'2690-08-6	1.461	1.4618
'7642-10-6	1.4059	1.4247
'6378-11-6	1.455	1.4629
'4694-12-6	1.433	1.44
'7379-12-6	1.4042	1.4087
'7058-01-7	1.4467	1.4409
'2680-03-7	1.473	1.4407
'2207-04-7	1.4185	1.4348
'5794-04-7	1.4564	1.4702
'2244-07-7	1.4293	1.4332
'3454-07-7	1.5376	1.5217
'5328-01-8	1.5953	1.5734
'3218-02-8	1.463	1.467
'4254-02-8	1.441	1.4399
'3288-04-8	1.6458	1.6181
'7642-04-8	1.415	1.4293
'2459-09-8	1.5135	1.5137
'2216-12-8	1.575	1.6094
'5503-12-8	1.5058	1.4878
'5332-06-9	1.4818	1.4615
'4606-07-9	1.419	1.4243
'4130-08-9	1.4226	1.4405
'2362-10-9	1.4398	1.4291
'4016-11-9	1.432	1.4026
'100-00-5	1.5376	1.5727
'100-06-1	1.547	1.5153
'100-17-4	1.507	1.5351
'100-37-8	1.4412	1.439
'100-75-4	1.4933	1.4687
'1000-86-8	1.439	1.4328
'1002-43-3	1.4208	1.4231
'1002-84-2	1.4254	1.4502
'100295-85-0	1.4254	1.4226
'100296-26-2	1.4265	1.4226
'1003-10-7	1.523	1.5196
'1003-30-1	1.4147	1.4171
'1003-64-1	1.4618	1.4635
'1003-78-7	1.4732	1.4459
'10048-32-5	1.4736	1.4763
'1005-64-7	1.542	1.5281
'10075-38-4	1.4735	1.4612
'101-40-6	1.46	1.4584
'101-68-8	1.5906	1.6131
'101257-71-0	1.4458	1.4592
'102-45-4	1.45	1.4495
'102-53-4	1.442	1.4434
'10233-13-3	1.428	1.4361
'103-29-7	1.5476	1.5789
'103-38-8	1.4884	1.4978
'103-55-9	1.5089	1.524
'103-71-9	1.5368	1.5524
'103-79-7	1.5168	1.5169
'10312-83-1	1.395	1.3738
'10395-45-6	1.4805	1.4689
'104-28-9	1.567	1.5105
'104-45-0	1.5045	1.499
'104-88-1	1.555	1.5626
'104-94-9	1.5559	1.5494
'10424-38-1	1.446	1.4466
'10473-14-0	1.4288	1.4208
'10476-95-6	1.4241	1.4334
'10498-35-8	1.4967	1.4759
'105-13-5	1.542	1.5355
'105-36-2	1.4489	1.4498
'105-41-9	1.415	1.4248
'105-59-9	1.4685	1.4631
'105-70-4	1.4395	1.44
'10508-09-5	1.4095	1.4175
'10519-06-9	1.497	1.496
'10522-26-6	1.4382	1.4374
'10574-36-4	1.4126	1.4204
'10574-37-5	1.4208	1.4161
'10588-10-0	1.4046	1.4193
'106-02-5	1.4708	1.4645
'106-23-0	1.4473	1.4424
'106-26-3	1.4869	1.462
'106-28-5	1.4877	1.4808
'106-39-8	1.5531	1.6028
'106-47-8	1.5546	1.5923
'106-49-0	1.5534	1.5579
'106-61-6	1.4157	1.4485
'106-74-1	1.4274	1.4257
'106-75-2	1.4542	1.4573
'106-79-6	1.4355	1.4375
'106-87-6	1.4787	1.4773
'106-90-1	1.449	1.4426
'106-93-4	1.5356	1.5033
'106-99-0	1.4292	1.411
'1067-20-5	1.4206	1.4133
'1068-19-5	1.4076	1.4133
'1068-87-7	1.4131	1.4066
'1069-53-0	1.4051	1.4066
'107-02-8	1.4017	1.3975
'107-06-2	1.4422	1.4207
'107-07-3	1.4419	1.4187
'107-11-9	1.4205	1.4278
'107-14-2	1.4202	1.4058
'107-16-4	1.4117	1.3994
'107-18-6	1.4135	1.4129
'107-21-1	1.4318	1.4157
'107-22-2	1.3826	1.3785
'107-25-5	1.373	1.3719
'107-30-2	1.397	1.3774
'107-52-8	1.3948	1.4185
'107-53-9	1.3994	1.4246
'107-72-2	1.4503	1.4492
'107-74-4	1.4599	1.4493
'107-75-5	1.4494	1.4437
'107-89-1	1.4238	1.4182
'107-93-7	1.4249	1.4573
'1070-32-2	1.4295	1.4251
'1070-34-4	1.4327	1.4413
'1070-71-9	1.3868	1.4139
'1071-26-7	1.4016	1.4133
'1071-81-4	1.4055	1.418
'1071-98-3	1.4647	1.477
'1072-05-5	1.4011	1.4087
'1072-16-8	1.4086	1.4136
'1072-21-5	1.435	1.4258
'1072-91-9	1.4589	1.4891
'1079-71-6	1.5372	1.571
'108-18-9	1.3924	1.4123
'108-23-6	1.4013	1.4141
'108-24-7	1.3901	1.3987
'108-43-0	1.5565	1.5913
'108-57-6	1.576	1.5425
'108-60-1	1.4505	1.4401
'108-95-2	1.5408	1.5667
'108-98-5	1.5893	1.5987
'109-17-1	1.461	1.4534
'109-57-9	1.5936	1.5915
'109-61-5	1.4035	1.4177
'109-77-3	1.4146	1.4022
'109-90-0	1.3808	1.3951
'109-93-3	1.3989	1.4109
'109-95-5	1.3418	1.3562
'110-00-9	1.4214	1.4399
'110-39-4	1.4267	1.4313
'110-41-8	1.4321	1.4326
'110-61-2	1.4173	1.4153
'110-78-1	1.397	1.4075
'110-85-0	1.446	1.4934
'110-89-4	1.453	1.4598
'110-94-1	1.4188	1.4709
'111-20-6	1.422	1.4693
'111-30-8	1.433	1.4194
'111-36-4	1.406	1.4162
'111-48-8	1.5211	1.5161
'111-61-5	1.4349	1.4443
'111-97-7	1.5047	1.4962
'1112-48-7	1.4561	1.4362
'1112-55-6	1.4625	1.4566
'1113-68-4	1.4502	1.4344
'1114-71-2	1.4752	1.4789
'1114-76-7	1.4403	1.4346
'1115-12-4	1.3919	1.4262
'1115-30-6	1.4346	1.4385
'1116-24-1	1.4419	1.4346
'1116-39-8	1.4188	1.4108
'1116-61-6	1.4135	1.4026
'111675-77-5	1.424	1.4251
'1117-55-1	1.4323	1.4358
'1117-59-5	1.4228	1.4285
'1117-61-9	1.4565	1.4482
'111767-95-4	1.4272	1.4251
'111768-04-8	1.4226	1.4202
'1119-49-9	1.4388	1.4299
'1119-60-4	1.4404	1.4514
'112-23-2	1.414	1.4204
'112-32-3	1.4208	1.4247
'112-37-8	1.4294	1.4448
'112-57-2	1.5042	1.5082
'112-61-8	1.4367	1.4433
'112-76-5	1.4523	1.452
'112-79-8	1.4499	1.4647
'112-85-6	1.427	1.4553
'112-91-4	1.4566	1.4572
'1120-16-7	1.4287	1.4505
'1120-28-1	1.4317	1.4453
'1120-56-5	1.421	1.4226
'1120-62-3	1.4216	1.4505
'1120-72-5	1.4364	1.4317
'1120-73-6	1.4762	1.4653
'1120-87-2	1.5694	1.5814
'1121-18-2	1.4833	1.4776
'1122-42-5	1.5992	1.6009
'1123-09-7	1.4812	1.4728
'1123-27-9	1.467	1.4765
'1123-34-8	1.4756	1.4814
'1123-84-8	1.5798	1.5734
'1129-89-1	1.484	1.4764
'113-18-8	1.474	1.4997
'1134-62-9	1.5777	1.5598
'114489-96-2	1.4247	1.428
'115-07-1	1.3567	1.3685
'115-11-7	1.3926	1.3803
'115-26-4	1.4267	1.4266
'115-31-1	1.512	1.5146
'115-67-3	1.449	1.4698
'115-71-9	1.5023	1.4815
'116-17-6	1.4085	1.4309
'116-26-7	1.5281	1.4991
'116783-23-4	1.368	1.3796
'116836-32-9	1.407	1.4193
'118-90-1	1.512	1.5586
'1185-33-7	1.4208	1.4175
'1186-53-4	1.4147	1.4089
'1189-99-7	1.4149	1.4158
'119-33-5	1.5744	1.5778
'1190-63-2	1.441	1.4533
'1190-83-6	1.4078	1.4158
'1191-04-4	1.446	1.4602
'1191-41-9	1.4694	1.4764
'1191-96-4	1.3786	1.4015
'1192-18-3	1.4222	1.4208
'1192-88-7	1.5005	1.4827
'1193-47-1	1.4486	1.4523
'1193-81-3	1.4656	1.4581
'1194-02-1	1.4925	1.5207
'120-29-6	1.4811	1.5075
'120-62-7	1.53	1.5208
'120-85-4	1.4433	1.4728
'121-21-1	1.5192	1.5066
'121-29-9	1.5258	1.5081
'121-45-9	1.4095	1.4111
'121-71-1	1.5348	1.5586
'121-73-3	1.5374	1.5727
'121-75-5	1.496	1.5147
'121-86-8	1.547	1.5625
'122-42-9	1.4989	1.5211
'122-52-1	1.4127	1.4275
'123-08-0	1.5705	1.5802
'123-73-9	1.4366	1.4252
'123-83-1	1.4222	1.4384
'123-95-5	1.4328	1.4463
'123-99-9	1.4303	1.4695
'124-63-0	1.4573	1.4217
'124-73-2	1.361	1.3992
'126-15-8	1.5254	1.5521
'126-68-1	1.448	1.4776
'126-71-6	1.4193	1.4287
'126-73-8	1.4224	1.4332
'126-98-7	1.4003	1.406
'126-99-8	1.4583	1.4421
'127-18-4	1.5059	1.5137
'127-91-3	1.4768	1.4505
'128-37-0	1.4859	1.5082
'128-50-7	1.493	1.4784
'13054-87-0	1.4489	1.4405
'13151-17-2	1.404	1.4217
'13151-34-3	1.4177	1.4197
'13171-21-6	1.4718	1.469
'13176-46-0	1.5281	1.4653
'13195-80-7	1.526	1.5341
'132-64-9	1.6079	1.6337
'13250-46-9	1.5231	1.55
'13254-34-7	1.4242	1.4291
'13286-92-5	1.457	1.4553
'1330-61-6	1.4416	1.4414
'13313-91-2	1.4501	1.4691
'13360-65-1	1.5014	1.4973
'13361-63-2	1.3983	1.4232
'13403-37-7	1.4358	1.4197
'13475-76-8	1.4499	1.4453
'13475-79-1	1.4246	1.4097
'13475-81-5	1.4282	1.418
'135-01-3	1.5035	1.5027
'13531-52-7	1.4805	1.4806
'13552-31-3	1.491	1.4767
'136-80-1	1.5675	1.5516
'13679-46-4	1.457	1.4503
'13838-16-9	1.3025	1.2986
'139-87-7	1.4663	1.4636
'13905-48-1	1.4979	1.48
'13984-57-1	1.4277	1.4264
'140-57-8	1.51	1.5145
'14007-64-8	1.4909	1.4985
'14064-10-9	1.4327	1.4394
'141-06-0	1.4065	1.4169
'141-10-6	1.5335	1.4778
'141-27-5	1.4898	1.462
'141-63-9	1.3925	1.4159
'141-91-3	1.446	1.4511
'14167-59-0	1.4296	1.4509
'142-50-7	1.4898	1.4777
'142-60-9	1.4221	1.4285
'142-77-8	1.448	1.4556
'143-07-7	1.4183	1.4465
'1441-87-8	1.5812	1.5904
'14417-88-0	1.505	1.5087
'1445-75-6	1.412	1.4143
'14452-30-3	1.622	1.6121
'14476-30-3	1.567	1.5488
'1453-24-3	1.4567	1.4635
'1454-84-8	1.4328	1.4488
'1455-20-5	1.509	1.5107
'1455-21-6	1.4548	1.4567
'1458-99-7	1.4322	1.4378
'14595-35-8	1.4435	1.4508
'14596-92-0	1.4379	1.4381
'146-54-3	1.578	1.5863
'14602-62-1	1.579	1.5406
'1462-12-0	1.4308	1.446
'1462-84-6	1.5053	1.506
'1464-53-5	1.435	1.4185
'14686-13-6	1.4045	1.4247
'1471-03-0	1.3919	1.4088
'14752-75-1	1.481	1.4807
'1484-85-1	1.562	1.5715
'1486-75-5	1.485	1.4764
'1487-18-9	1.4992	1.4776
'1489-57-2	1.4662	1.498
'14938-35-3	1.5272	1.5199
'14979-39-6	1.43	1.4226
'1501-60-6	1.446	1.4329
'151-19-9	1.437	1.4324
'151-67-7	1.3697	1.3823
'15121-84-3	1.5637	1.5599
'1515-76-0	1.469	1.4502
'152-16-9	1.462	1.4786
'15220-85-6	1.4482	1.4404
'1527-89-5	1.5402	1.5323
'1540-28-9	1.4255	1.4279
'15403-89-1	1.463	1.4813
'15501-33-4	1.489	1.4877
'1556-18-9	1.5447	1.5276
'1558-24-3	1.4714	1.4824
'1558-25-4	1.4555	1.4643
'1558-31-2	1.47	1.4615
'1559-81-5	1.5353	1.5406
'156-08-1	1.5515	1.5592
'1560-06-1	1.5101	1.5281
'1561-10-0	1.4051	1.4193
'15647-08-2	1.5207	1.5368
'1569-60-4	1.4505	1.4441
'157-40-4	1.412	1.4401
'15706-73-7	1.4135	1.4193
'1574-33-0	1.4332	1.4434
'1576-96-1	1.4341	1.4427
'15840-60-5	1.401	1.4217
'15869-80-4	1.4093	1.4109
'15869-86-0	1.4151	1.4156
'15869-87-1	1.4082	1.4178
'15869-89-3	1.4112	1.4136
'15869-92-8	1.4182	1.4136
'15869-94-0	1.4139	1.4136
'1589-47-5	1.407	1.3964
'1590-08-5	1.5535	1.5533
'15932-80-6	1.4869	1.4681
'1600-37-9	1.5313	1.5308
'1604-01-9	1.4661	1.4578
'1604-02-0	1.4502	1.4547
'1604-11-1	1.42	1.4188
'1609-47-8	1.396	1.4156
'16136-84-8	1.4055	1.431
'16136-85-9	1.4054	1.431
'1615-80-1	1.4204	1.4339
'1617-18-1	1.4105	1.421
'16177-46-1	1.4563	1.454
'16262-48-9	1.5684	1.5307
'1629-58-9	1.4195	1.4142
'1630-94-0	1.3668	1.4059
'16302-35-5	1.4495	1.4591
'1631-82-9	1.5171	1.505
'1634-09-9	1.5819	1.5598
'16369-21-4	1.4428	1.4389
'1638-26-2	1.4136	1.4272
'16409-44-2	1.4624	1.4586
'16409-46-4	1.4486	1.4497
'1647-26-3	1.4899	1.4816
'1649-08-7	1.3619	1.3709
'16491-15-9	1.4331	1.4479
'16529-66-1	1.422	1.4349
'1653-19-6	1.489	1.4669
'1653-40-3	1.4251	1.4251
'16714-68-4	1.5098	1.5022
'1674-10-8	1.462	1.4591
'1674-30-2	1.5523	1.5509
'1674-33-5	1.4485	1.4349
'1674-56-2	1.4479	1.4351
'16746-86-4	1.4113	1.4149
'16747-25-4	1.4106	1.4111
'16747-28-7	1.4141	1.4111
'16747-30-1	1.4074	1.4111
'16747-31-2	1.4178	1.4111
'16747-32-3	1.4123	1.4111
'16747-33-4	1.4221	1.4111
'16747-38-9	1.4222	1.4089
'16747-44-7	1.4361	1.416
'16747-45-8	1.4307	1.416
'16747-50-5	1.4272	1.4318
'1678-82-6	1.4366	1.4385
'16789-46-1	1.4106	1.4087
'1679-06-7	1.4451	1.4498
'1679-09-0	1.4385	1.451
'1679-49-8	1.4339	1.4244
'1680-51-9	1.5357	1.5474
'16883-48-0	1.4106	1.4233
'16939-57-4	1.6089	1.5494
'17015-11-1	1.4167	1.4141
'17071-47-5	1.4077	1.4053
'17082-09-6	1.614	1.5654
'17082-12-1	1.6266	1.6061
'17094-21-2	1.416	1.4131
'1710-98-1	1.5364	1.5231
'17113-33-6	1.592	1.5705
'1712-64-7	1.3912	1.3936
'1717-00-6	1.36	1.3944
'1729-67-5	1.5127	1.4992
'17312-63-9	1.4273	1.4261
'1755-01-7	1.505	1.5441
'17556-48-8	1.313	1.3121
'1758-33-4	1.3802	1.3854
'1759-58-6	1.4107	1.4208
'1759-81-5	1.4209	1.4505
'17679-92-4	1.4592	1.4515
'17699-86-4	1.4701	1.4782
'1781-78-8	1.485	1.4912
'17851-27-3	1.5075	1.5045
'17878-44-3	1.5145	1.5157
'1795-20-6	1.4446	1.4428
'1795-21-7	1.4486	1.4459
'1795-26-2	1.4307	1.4355
'1795-48-8	1.3825	1.4035
'17952-11-3	1.3927	1.4011
'18023-33-1	1.3981	1.4224
'1809-05-8	1.4974	1.4845
'18171-59-0	1.461	1.4423
'1820-09-3	1.4908	1.4766
'1821-36-9	1.561	1.5456
'1822-74-8	1.4837	1.4771
'1822-86-2	1.4988	1.4797
'1825-31-6	1.6228	1.6357
'1825-82-7	1.4045	1.4409
'18309-32-5	1.4993	1.4689
'18328-90-0	1.4221	1.4306
'18362-97-5	1.4061	1.4145
'1838-73-9	1.4211	1.4226
'18388-45-9	1.4104	1.4177
'18435-45-5	1.4445	1.4461
'1845-30-3	1.4912	1.4766
'18479-57-7	1.422	1.4324
'18492-37-0	1.4702	1.4712
'1860-27-1	1.387	1.3986
'1868-53-7	1.4685	1.4675
'1871-52-9	1.5035	1.5511
'1873-25-2	1.44	1.4342
'1873-92-3	1.4419	1.4426
'18794-84-8	1.4899	1.4723
'18854-56-3	1.4013	1.4077
'1888-71-7	1.5091	1.5427
'1896-62-4	1.5836	1.541
'18970-44-0	1.508	1.4964
'19269-28-4	1.4122	1.4127
'1937-54-8	1.4755	1.4536
'1943-16-4	1.45	1.4962
'1954-28-5	1.4622	1.4451
'19549-79-2	1.4283	1.4244
'19780-66-6	1.414	1.4149
'19889-37-3	1.425	1.4343
'20089-07-0	1.444	1.4475
'20237-34-7	1.4406	1.4381
'20278-89-1	1.4229	1.4116
'20281-83-8	1.4112	1.4141
'20281-86-1	1.4144	1.4141
'20281-91-8	1.4148	1.4144
'2039-93-2	1.5288	1.5145
'20395-25-9	1.4718	1.4542
'2040-95-1	1.4316	1.4328
'2040-96-2	1.4266	1.4288
'2049-67-4	1.4411	1.4492
'2050-08-0	1.506	1.5211
'2050-24-0	1.5027	1.5019
'2050-69-3	1.5338	1.6357
'2050-73-9	1.6092	1.6357
'2050-74-0	1.6236	1.6357
'2051-61-8	1.6181	1.6175
'2051-78-7	1.4158	1.4263
'2055-40-5	1.5289	1.513
'2057-43-4	1.5076	1.5187
'20739-58-6	1.4556	1.4577
'2077-13-6	1.5168	1.5204
'2082-81-7	1.456	1.453
'2084-19-7	1.4412	1.4475
'2100-17-6	1.4191	1.4199
'2103-57-3	1.5547	1.5115
'21040-45-9	1.5425	1.5285
'2108-92-1	1.4803	1.4827
'21087-29-6	1.5851	1.5516
'2109-66-2	1.4638	1.4766
'21129-27-1	1.4619	1.4597
'21266-88-6	1.4992	1.4803
'21266-90-0	1.501	1.4803
'21548-32-3	1.5348	1.5417
'2155-30-8	1.4141	1.4118
'21564-91-0	1.526	1.536
'2167-39-7	1.3885	1.3896
'22029-76-1	1.4969	1.4944
'2207-27-4	1.5282	1.5329
'22083-74-5	1.5289	1.5367
'2210-28-8	1.419	1.4222
'22104-78-5	1.447	1.4508
'2211-67-8	1.4409	1.4269
'2211-68-9	1.419	1.4312
'2211-70-3	1.4165	1.4185
'22144-60-1	1.5139	1.5193
'2216-34-4	1.4039	1.4109
'22160-39-0	1.413	1.4265
'22160-40-3	1.4159	1.4265
'2219-66-1	1.588	1.5444
'2230-70-8	1.4493	1.4511
'2233-00-3	1.4827	1.4812
'2243-35-8	1.5036	1.5188
'22768-19-0	1.419	1.4254
'2288-18-8	1.5489	1.535
'2306-88-9	1.4352	1.4393
'23074-36-4	1.4527	1.454
'2310-98-7	1.4575	1.4633
'2313-65-7	1.4198	1.4175
'2314-97-8	1.379	1.4024
'2328-24-7	1.5237	1.5395
'23315-05-1	1.4798	1.4678
'2344-83-4	1.4319	1.4159
'2345-26-8	1.4576	1.458
'2351-13-5	1.4719	1.46
'23578-35-0	1.4459	1.4591
'23580-51-0	1.443	1.4522
'2366-52-1	1.3396	1.3453
'2388-14-9	1.5238	1.5055
'2396-78-3	1.424	1.4352
'2396-83-0	1.4255	1.4386
'2408-20-0	1.4105	1.421
'2408-37-9	1.447	1.4511
'2409-55-4	1.4969	1.5221
'2412-73-9	1.52	1.5305
'2426-54-2	1.4376	1.4491
'2431-50-7	1.4944	1.4809
'2432-63-5	1.4434	1.4508
'2436-85-3	1.6443	1.5896
'2436-90-0	1.4362	1.4432
'2444-37-3	1.495	1.506
'2456-27-1	1.4356	1.4372
'24622-72-8	1.4978	1.5074
'2463-63-0	1.4468	1.4407
'24734-68-7	1.5494	1.5539
'24840-05-9	1.5843	1.5621
'2495-25-2	1.448	1.4464
'24965-84-2	1.4483	1.4468
'2497-21-4	1.4388	1.432
'2512-81-4	1.4395	1.4546
'25144-05-2	1.4504	1.4431
'2523-37-7	1.61	1.6234
'2525-16-8	1.463	1.4672
'2531-80-8	1.421	1.424
'25312-34-9	1.4735	1.4949
'25346-31-0	1.4525	1.4441
'25346-32-1	1.4113	1.413
'25346-33-2	1.4495	1.4411
'25394-57-4	1.5134	1.4922
'254-04-6	1.5869	1.5991
'25415-67-2	1.405	1.4145
'2550-28-9	1.4366	1.4306
'2579-22-8	1.6079	1.5702
'25790-55-0	1.4775	1.4478
'2586-89-2	1.4189	1.431
'26002-80-2	1.5483	1.5536
'2612-46-6	1.4577	1.4597
'2613-65-2	1.4186	1.426
'2613-66-3	1.4203	1.426
'2614-88-2	1.5545	1.4882
'26171-83-5	1.4378	1.43
'26186-02-7	1.4309	1.4422
'2621-46-7	1.5117	1.5204
'2622-21-1	1.4915	1.4833
'2623-95-2	1.4595	1.4737
'2636-26-2	1.5404	1.5763
'26438-26-6	1.5477	1.531
'26438-27-7	1.5435	1.5272
'2652-13-3	1.398	1.4229
'26549-25-7	1.4201	1.4202
'2676-33-7	1.4124	1.4198
'2678-54-8	1.3643	1.4045
'2725-82-8	1.5465	1.5574
'2736-40-5	1.4234	1.427
'27387-79-7	1.4321	1.4331
'274-07-7	1.507	1.4411
'2741-16-4	1.4975	1.4962
'2759-28-6	1.543	1.5678
'2765-18-6	1.5923	1.569
'2791-29-9	1.4382	1.4355
'2798-73-4	1.4818	1.4432
'2807-54-7	1.467	1.4772
'2808-76-6	1.449	1.4601
'2809-64-5	1.5439	1.5474
'2819-48-9	1.4718	1.4682
'28467-92-7	1.578	1.5333
'2847-72-5	1.4352	1.4197
'286-08-8	1.4564	1.4592
'2876-53-1	1.5647	1.5456
'288-32-4	1.4801	1.5032
'288-36-8	1.4854	1.4931
'288-39-1	1.515	1.5306
'288-99-3	1.43	1.4083
'2882-98-6	1.4467	1.4445
'289-65-6	1.4559	1.5109
'290-37-9	1.4953	1.506
'290-38-0	1.5149	1.4977
'29003-73-4	1.442	1.4477
'2902-96-7	1.4379	1.4276
'2912-62-1	1.544	1.5531
'2915-53-9	1.4539	1.4583
'2917-47-7	1.4298	1.4146
'29204-02-2	1.4597	1.4649
'293-55-0	1.4666	1.454
'2937-50-0	1.422	1.4388
'2941-64-2	1.482	1.4962
'2943-70-6	1.466	1.452
'29606-79-9	1.4675	1.4611
'2978-58-7	1.4235	1.4513
'2980-71-4	1.4241	1.4262
'2983-26-8	1.5044	1.4855
'2983-37-1	1.4123	1.4233
'29882-57-3	1.4069	1.4089
'300-62-9	1.518	1.5292
'3000-79-1	1.4459	1.4571
'3002-24-2	1.4516	1.4164
'3004-93-1	1.4281	1.4381
'3008-39-7	1.4689	1.4786
'3016-19-1	1.5446	1.471
'3017-68-3	1.4631	1.467
'3017-71-8	1.4602	1.467
'3017-95-6	1.4795	1.4591
'3017-96-7	1.4745	1.4591
'3019-20-3	1.5464	1.5513
'3031-73-0	1.3641	1.3333
'3031-74-1	1.38	1.3667
'3036-66-6	1.4594	1.4317
'30389-18-5	1.4817	1.5003
'3068-00-6	1.4688	1.4664
'30685-95-1	1.5041	1.4891
'307-34-6	1.282	1.2526
'3074-75-7	1.4063	1.4087
'3074-76-8	1.414	1.4133
'3074-77-9	1.4134	1.4087
'3083-23-6	1.4737	1.4857
'3101-60-8	1.5145	1.507
'3102-33-8	1.435	1.4263
'311-45-5	1.5096	1.5102
'311-89-7	1.291	1.2681
'312-40-3	1.5221	1.5306
'31367-46-1	1.4199	1.4226
'3156-70-5	1.4527	1.4355
'3173-53-3	1.4551	1.4648
'3175-23-3	1.4609	1.458
'3178-29-8	1.4135	1.4156
'31849-78-2	1.4536	1.4728
'31879-05-7	1.5742	1.592
'32360-05-7	1.429	1.4508
'3244-90-4	1.471	1.5097
'3252-43-5	1.5393	1.5333
'3256-88-0	1.6055	1.5929
'32620-08-9	1.4527	1.4728
'32665-23-9	1.396	1.4122
'3274-29-1	1.4255	1.4381
'3282-30-2	1.4139	1.4251
'32830-97-0	1.4361	1.4249
'3289-28-9	1.4501	1.4495
'3319-15-1	1.531	1.5237
'3329-48-4	1.4342	1.4396
'333-41-5	1.4922	1.5264
'334-48-5	1.4288	1.4428
'335-44-4	1.353	1.3515
'335-57-9	1.2618	1.2493
'3350-78-5	1.477	1.4506
'33560-15-5	1.4483	1.4662
'336-59-4	1.285	1.2888
'338-83-0	1.279	1.2647
'33880-83-0	1.4935	1.4744
'33966-50-6	1.3932	1.4077
'3404-67-9	1.4142	1.4149
'3404-71-5	1.405	1.4114
'3404-73-7	1.3984	1.4159
'34256-82-1	1.5272	1.5191
'3437-89-6	1.565	1.5237
'3439-97-2	1.5599	1.5815
'34713-94-5	1.4092	1.4062
'350-50-5	1.4892	1.4883
'35161-71-8	1.4332	1.4358
'3521-91-3	1.4347	1.4363
'3524-75-2	1.4412	1.4452
'353-55-9	1.457	1.5052
'35305-13-6	1.4538	1.4571
'354-04-1	1.4191	1.4168
'354-06-3	1.3738	1.3823
'354-14-3	1.439	1.456
'354-21-2	1.3889	1.404
'354-58-5	1.361	1.3873
'355-02-2	1.285	1.2698
'355-04-4	1.2564	1.2451
'355-42-0	1.2515	1.2451
'355-75-9	1.293	1.2922
'3554-74-3	1.4735	1.4816
'356-16-1	1.3265	1.3421
'356-24-1	1.295	1.2959
'35608-64-1	1.4182	1.4257
'3587-57-3	1.4125	1.4038
'3588-30-5	1.4442	1.4142
'359-02-4	1.4031	1.4264
'359-28-4	1.439	1.4224
'3600-24-6	1.5689	1.5761
'36049-78-2	1.4896	1.4797
'36357-38-7	1.5302	1.5164
'3638-35-5	1.3865	1.4077
'3638-64-0	1.4282	1.4093
'36383-15-0	1.4902	1.4966
'36566-80-0	1.412	1.4279
'3658-48-8	1.442	1.4353
'3658-79-5	1.4029	1.4108
'36653-82-4	1.4283	1.4456
'367-64-6	1.353	1.3585
'3675-68-1	1.5626	1.5316
'3675-69-2	1.568	1.5387
'368-43-4	1.4932	1.5132
'368-47-8	1.411	1.4292
'36823-84-4	1.5434	1.5152
'3683-19-0	1.4026	1.4217
'3683-22-5	1.4025	1.4204
'36847-51-5	1.496	1.4925
'3689-24-5	1.4753	1.5205
'371-62-0	1.3647	1.3303
'37143-54-7	1.4031	1.4079
'3726-45-2	1.4531	1.4361
'373-14-8	1.3738	1.3754
'374-07-2	1.3092	1.3322
'375-01-9	1.294	1.2817
'375-16-6	1.288	1.3039
'375-22-4	1.295	1.2912
'375-83-7	1.269	1.2537
'37674-63-8	1.4402	1.4564
'37746-78-4	1.4925	1.4809
'378-75-6	1.2869	1.2993
'3788-32-7	1.4298	1.4302
'3790-71-4	1.4877	1.4808
'3810-26-2	1.544	1.5703
'38300-67-3	1.5608	1.5355
'384-04-3	1.3	1.2853
'38552-72-6	1.4345	1.437
'3856-25-5	1.4894	1.4813
'3857-25-8	1.4853	1.4898
'38651-65-9	1.4787	1.4474
'3875-51-2	1.4258	1.426
'38870-89-2	1.4199	1.4089
'3899-36-3	1.4109	1.4217
'3917-15-5	1.4062	1.4198
'39191-07-6	1.535	1.5503
'3938-95-2	1.3906	1.4116
'3944-36-3	1.407	1.411
'3970-62-5	1.4223	1.4204
'3972-56-3	1.5123	1.5177
'3974-99-0	1.4428	1.4661
'3982-67-0	1.5074	1.5045
'40058-87-5	1.4149	1.4235
'4032-94-4	1.4091	1.4136
'4043-71-4	1.5782	1.5651
'4054-38-0	1.4978	1.5211
'4065-80-9	1.4843	1.4766
'4067-16-7	1.5096	1.5143
'407-25-0	1.269	1.296
'4074-88-8	1.4595	1.4552
'4079-52-1	1.5393	1.5121
'4088-60-2	1.4342	1.4379
'4096-21-3	1.5813	1.5513
'4117-15-1	1.453	1.457
'4127-45-1	1.3864	1.4114
'4128-31-8	1.4203	1.4251
'4164-28-7	1.4462	1.4198
'4192-77-2	1.5598	1.5285
'420-04-2	1.4418	1.4013
'42027-23-6	1.4412	1.4319
'4208-49-5	1.4945	1.4845
'4208-64-4	1.4827	1.4808
'421-06-7	1.3331	1.3451
'421-20-5	1.3326	1.351
'4212-43-5	1.4148	1.4052
'4219-24-3	1.4935	1.4602
'42474-21-5	1.4986	1.483
'42569-16-4	1.428	1.4386
'4259-00-1	1.4199	1.429
'4265-25-2	1.5495	1.556
'4279-76-9	1.5125	1.5441
'4283-80-1	1.442	1.4441
'4288-84-0	1.437	1.435
'430-51-3	1.37	1.3377
'430-57-9	1.4132	1.3897
'430-71-7	1.329	1.3377
'430-95-5	1.4196	1.4273
'431-06-1	1.3619	1.3629
'432-25-7	1.4971	1.4743
'4351-54-6	1.443	1.4495
'4358-59-2	1.4175	1.4254
'4393-06-0	1.5406	1.5485
'4435-18-1	1.4382	1.4846
'4437-22-3	1.5088	1.5088
'4457-00-5	1.4392	1.4387
'44914-03-6	1.424	1.428
'4493-42-9	1.4874	1.4637
'4516-69-2	1.4112	1.429
'452-86-8	1.5425	1.5966
'4525-44-4	1.4197	1.4223
'453-13-4	1.3725	1.3309
'454-14-8	1.4832	1.4903
'457-87-4	1.4986	1.5098
'458-88-8	1.4512	1.4593
'4588-18-5	1.4184	1.4222
'459-73-4	1.4242	1.4266
'4593-16-2	1.4731	1.4671
'460-12-8	1.4189	1.439
'460-35-5	1.335	1.3294
'4609-87-4	1.4337	1.436
'4628-21-1	1.439	1.4371
'463-11-6	1.3946	1.3936
'463-71-8	1.5442	1.5913
'463-82-1	1.3476	1.3817
'464-10-8	1.579	1.5997
'4645-15-2	1.4741	1.472
'4663-22-3	1.4252	1.4257
'470-40-6	1.5031	1.5076
'470-67-7	1.4562	1.4589
'470-99-5	1.4717	1.4832
'471-16-9	1.4871	1.4837
'4727-17-7	1.4555	1.4707
'473-06-3	1.472	1.4689
'473-55-2	1.4605	1.4372
'4737-41-1	1.4222	1.4158
'4747-15-3	1.562	1.5301
'4749-28-4	1.4358	1.4137
'475-03-6	1.5257	1.5321
'475-20-7	1.504	1.5028
'4753-75-7	1.4729	1.4809
'4753-80-4	1.5044	1.5187
'4773-83-5	1.5521	1.5434
'479-27-6	1.6828	1.6772
'4806-61-5	1.402	1.4111
'481-20-9	1.4884	1.4908
'481-21-0	1.4887	1.4908
'483-76-1	1.5089	1.4976
'483-78-3	1.5785	1.5541
'485-43-8	1.4607	1.4693
'4850-28-6	1.4186	1.4233
'486-25-9	1.6309	1.6618
'488-23-3	1.5203	1.5086
'489-86-1	1.4716	1.4986
'4891-38-7	1.5618	1.5467
'4894-61-5	1.435	1.4371
'490-10-8	1.4859	1.4933
'491-04-3	1.4729	1.4763
'491-07-6	1.4527	1.4477
'491-09-8	1.5294	1.4919
'4911-55-1	1.4431	1.4573
'4912-92-9	1.5135	1.5329
'4914-89-0	1.4126	1.4204
'493-08-3	1.5444	1.5583
'494-52-0	1.543	1.5518
'494-97-3	1.5378	1.5502
'494-99-5	1.5257	1.5017
'4945-48-6	1.4467	1.4597
'495-45-4	1.6343	1.591
'495-61-4	1.488	1.4852
'496-10-6	1.4702	1.4667
'496-49-1	1.4555	1.4581
'497-04-1	1.4831	1.461
'497-20-1	1.492	1.5182
'49763-65-7	1.53	1.5187
'498-15-7	1.469	1.4826
'498-67-9	1.518	1.5288
'4985-70-0	1.6959	1.669
'50-36-2	1.5022	1.5424
'501-92-8	1.5441	1.5565
'502-61-4	1.4836	1.4776
'502-99-8	1.4862	1.4558
'5026-76-6	1.407	1.4186
'503-29-7	1.4287	1.4254
'503-38-8	1.4566	1.4958
'503-64-0	1.445	1.4573
'503-66-2	1.4489	1.4492
'504-03-0	1.4377	1.455
'504-61-0	1.4288	1.4379
'504-64-3	1.4538	1.4414
'505-60-2	1.5313	1.4989
'505-84-0	1.3939	1.4015
'506-23-0	1.5112	1.4901
'506-25-2	1.4915	1.4944
'506-30-9	1.425	1.4542
'506-33-2	1.4347	1.4651
'506-46-7	1.4301	1.4571
'506-48-9	1.4313	1.4577
'506-50-3	1.4323	1.4584
'50623-57-9	1.4262	1.4337
'507-02-8	1.5491	1.5232
'507-45-9	1.445	1.435
'5076-20-0	1.3984	1.4149
'5077-67-8	1.4189	1.4162
'508-32-7	1.4296	1.4465
'50876-33-0	1.4125	1.4355
'509-14-8	1.4384	1.4988
'51-79-6	1.4144	1.4188
'512-85-6	1.4769	1.4735
'513-02-0	1.4057	1.4202
'513-08-6	1.4165	1.4256
'513-37-1	1.4221	1.4312
'51309-10-5	1.4578	1.4503
'5137-45-1	1.3843	1.384
'5150-93-6	1.436	1.4466
'5161-13-7	1.4799	1.4831
'5162-48-1	1.4288	1.4227
'5171-84-6	1.4368	1.4453
'5183-77-7	1.5445	1.5282
'519-02-8	1.5286	1.5563
'519-73-3	1.5839	1.6235
'5194-50-3	1.456	1.4493
'5194-51-4	1.451	1.4493
'52-53-9	1.5448	1.5259
'52152-71-3	1.4991	1.4869
'52217-02-4	1.4171	1.4119
'5223-59-6	1.5554	1.5585
'523-47-7	1.5059	1.498
'52387-50-5	1.4392	1.4426
'52390-72-4	1.421	1.4202
'525-06-4	1.615	1.6108
'52562-19-3	1.5722	1.5544
'5258-50-4	1.4922	1.4988
'526-35-2	1.4688	1.4857
'52708-03-9	1.4197	1.429
'52896-87-4	1.4153	1.4136
'529-16-8	1.4688	1.4761
'529-36-2	1.6802	1.6617
'53152-98-0	1.447	1.4571
'53178-20-4	1.3971	1.3999
'532-24-1	1.4598	1.4984
'533-32-4	1.4422	1.4353
'533-60-8	1.4785	1.4753
'5340-36-3	1.4257	1.4314
'5349-60-0	1.5277	1.5178
'535-15-9	1.4386	1.4424
'535-86-4	1.4865	1.4689
'53566-37-3	1.4176	1.4279
'536-59-4	1.5005	1.4947
'537-26-8	1.508	1.5519
'53778-43-1	1.3887	1.4149
'538-07-8	1.4653	1.4584
'538-24-9	1.4404	1.4583
'538-51-2	1.6	1.6067
'539-00-4	1.4683	1.4707
'539-30-0	1.4955	1.4995
'539-52-6	1.4705	1.4982
'539-80-0	1.6172	1.5557
'539-86-6	1.561	1.5366
'539-89-9	1.4288	1.4304
'539-92-4	1.4072	1.4169
'5396-24-7	1.4261	1.4242
'540-09-0	1.4283	1.4477
'540-10-3	1.4398	1.4524
'540-47-6	1.3802	1.3896
'540-67-0	1.342	1.3498
'540-73-8	1.4209	1.4193
'540-82-9	1.4105	1.4278
'541-01-5	1.3965	1.4203
'541-33-3	1.4355	1.4304
'541-35-5	1.4087	1.4276
'541-41-3	1.3974	1.4089
'542-52-9	1.4117	1.4211
'542-88-1	1.435	1.42
'542-92-7	1.444	1.4999
'543-28-2	1.4098	1.4288
'543-29-3	1.4028	1.4042
'543-67-9	1.3604	1.3757
'5432-85-9	1.4552	1.4484
'544-02-5	1.452	1.4549
'544-63-8	1.4723	1.4491
'544-73-0	1.5	1.4901
'544-77-4	1.4797	1.4759
'545-47-1	1.491	1.5169
'5451-80-9	1.4254	1.4313
'5451-92-3	1.4216	1.4282
'54527-68-3	1.443	1.4404
'54532-97-7	1.5604	1.5634
'5454-28-4	1.4204	1.4285
'5454-79-5	1.4752	1.4568
'546-80-5	1.449	1.4608
'54638-10-7	1.4012	1.4087
'54819-86-2	1.4263	1.4305
'55-91-4	1.383	1.3957
'5502-88-5	1.4735	1.4589
'55066-53-0	1.4618	1.4629
'551-01-9	1.5855	1.5491
'551-09-7	1.6648	1.6185
'5510-99-6	1.508	1.5053
'55156-16-6	1.4002	1.401
'552-41-0	1.5452	1.544
'552-70-5	1.476	1.505
'553-60-6	1.4926	1.5003
'553-90-2	1.379	1.3994
'55320-06-4	1.454	1.4487
'554-70-1	1.458	1.4297
'555-10-2	1.4788	1.4742
'555-43-1	1.4395	1.461
'555-44-2	1.4381	1.4603
'555-45-3	1.4428	1.4594
'556-69-4	1.397	1.4218
'557-00-6	1.4031	1.4145
'557-25-5	1.4531	1.4528
'557-59-5	1.4287	1.4563
'557-68-6	1.641	1.5869
'557-98-2	1.3973	1.4088
'558-13-4	1.5942	1.634
'558-43-0	1.435	1.4346
'55944-70-2	1.4537	1.4449
'56-23-5	1.4601	1.4877
'56-38-2	1.537	1.5605
'560-21-4	1.4075	1.4054
'560-23-6	1.4174	1.4176
'560-95-2	1.4808	1.5321
'56103-67-4	1.495	1.5031
'5617-42-5	1.4421	1.4409
'562-49-2	1.3909	1.401
'56298-90-9	1.424	1.4226
'563-45-1	1.3643	1.3959
'563-58-6	1.443	1.4601
'563-70-2	1.488	1.4661
'564-04-5	1.4065	1.4116
'565-63-9	1.4434	1.4531
'565-67-3	1.4175	1.411
'5650-40-8	1.536	1.5395
'56688-75-6	1.4414	1.4641
'57-06-7	1.5306	1.5483
'57-11-4	1.4299	1.4529
'57-14-7	1.4075	1.427
'57-57-8	1.4105	1.3983
'5703-26-4	1.5359	1.5195
'57129-69-8	1.4328	1.4244
'57392-55-9	1.4521	1.4663
'5743-97-5	1.5011	1.4986
'575-37-1	1.6083	1.5835
'575-43-9	1.6166	1.5835
'57526-28-0	1.417	1.4216
'5756-43-4	1.4008	1.4076
'577-27-5	1.4667	1.5002
'577-55-9	1.496	1.4912
'5787-31-5	1.4366	1.4331
'57968-71-5	1.4438	1.4598
'58-72-0	1.6292	1.6349
'580-13-2	1.6382	1.6488
'581-49-7	1.5676	1.5838
'581-50-0	1.6223	1.6043
'582-22-9	1.5255	1.5292
'582-33-2	1.56	1.5434
'583-05-1	1.525	1.5178
'586-39-0	1.5836	1.5563
'586-84-5	1.5325	1.4816
'5870-93-9	1.4231	1.4285
'588-72-7	1.6093	1.5907
'588-73-8	1.599	1.5907
'5881-17-4	1.4156	1.4156
'589-40-2	1.3865	1.3972
'590-11-4	1.5428	1.5556
'590-12-5	1.5505	1.5556
'590-13-6	1.456	1.4739
'590-18-1	1.3931	1.4005
'590-19-2	1.4205	1.4098
'590-50-1	1.4036	1.4116
'590-66-9	1.429	1.4407
'591-11-7	1.4454	1.4626
'591-34-4	1.3952	1.4087
'591-62-8	1.4278	1.433
'591-96-8	1.4284	1.4323
'5912-86-7	1.5726	1.553
'5917-47-5	1.4588	1.4631
'592-34-7	1.4114	1.4242
'592-44-9	1.4282	1.4264
'592-57-4	1.4755	1.51
'5921-54-0	1.4511	1.4381
'593-39-5	1.4533	1.4647
'593-49-7	1.4345	1.447
'593-66-8	1.5385	1.5379
'593-96-4	1.466	1.4576
'593-98-6	1.4144	1.4209
'594-08-1	1.8225	1.7287
'594-34-3	1.5119	1.4929
'594-37-6	1.437	1.434
'594-38-7	1.4981	1.4877
'594-42-3	1.5484	1.564
'594-51-4	1.5729	1.4864
'594-60-5	1.4176	1.4144
'594-71-8	1.4378	1.4322
'594-83-2	1.4233	1.4233
'595-41-5	1.4287	1.4204
'5951-67-7	1.513	1.4851
'5966-51-8	1.4418	1.4562
'597-90-0	1.4332	1.4314
'597-96-6	1.4231	1.4232
'598-02-7	1.417	1.4248
'598-03-8	1.4456	1.4243
'598-23-2	1.3723	1.4041
'598-31-2	1.4697	1.4494
'598-38-9	1.4626	1.4551
'598-53-8	1.3576	1.3655
'598-55-0	1.4125	1.4073
'598-57-2	1.4616	1.4141
'598-58-3	1.3748	1.3617
'598-61-8	1.3866	1.4015
'598-82-3	1.4392	1.4433
'598-92-5	1.4224	1.4206
'5984-58-7	1.4209	1.429
'5986-55-0	1.5029	1.4952
'60-34-4	1.4325	1.4227
'600-07-7	1.4051	1.4203
'600-11-3	1.4464	1.4319
'600-25-9	1.4251	1.4281
'601-76-3	1.4339	1.4317
'60212-29-5	1.4391	1.4432
'60251-57-2	1.4442	1.446
'603-35-0	1.6358	1.6408
'604-88-6	1.4736	1.4924
'605-01-6	1.5127	1.494
'605-45-8	1.49	1.4984
'605-50-5	1.4871	1.4914
'607-91-0	1.5403	1.5429
'609-02-9	1.4128	1.413
'609-31-4	1.439	1.4337
'6091-52-7	1.4845	1.4689
'610-17-3	1.6102	1.5462
'610-48-0	1.6802	1.644
'610-89-9	1.4388	1.4408
'6108-61-8	1.4606	1.4493
'611-06-3	1.5512	1.5915
'611-20-1	1.5372	1.5901
'611-69-8	1.5193	1.516
'6111-88-2	1.4308	1.4281
'6114-18-7	1.448	1.4546
'612-00-0	1.5756	1.5757
'612-23-7	1.5557	1.5587
'612-55-5	1.6662	1.6857
'612-57-7	1.611	1.6236
'6125-21-9	1.4654	1.4356
'6125-24-2	1.5407	1.5291
'613-37-6	1.5744	1.5865
'613-84-3	1.547	1.5679
'613-89-8	1.616	1.5572
'6138-90-5	1.5027	1.4841
'6139-84-0	1.4466	1.4238
'614-27-7	1.537	1.5188
'614-45-9	1.499	1.4999
'6140-65-4	1.4872	1.4711
'615-13-4	1.538	1.5687
'615-38-3	1.464	1.4568
'615-39-4	1.4616	1.4568
'615-81-6	1.41	1.4211
'615-98-5	1.4158	1.4258
'615-99-6	1.4481	1.4544
'61531-45-1	1.4318	1.4358
'616-20-6	1.4082	1.4089
'616-31-9	1.4447	1.4475
'616-45-5	1.4806	1.4621
'6163-66-2	1.3949	1.4081
'6166-86-5	1.3912	1.4192
'617-33-4	1.5017	1.4992
'617-51-6	1.4082	1.4227
'617-88-9	1.4941	1.4813
'618-31-5	1.6147	1.6028
'6189-41-9	1.3736	1.3854
'619-23-8	1.5577	1.5587
'619-99-8	1.4018	1.4051
'61915-27-3	1.4287	1.4173
'6195-92-2	1.4329	1.4317
'62-75-9	1.4368	1.3954
'620-16-6	1.5195	1.5312
'620-63-3	1.4354	1.4454
'620-83-7	1.5712	1.5816
'621-32-9	1.513	1.5027
'62108-66-1	1.429	1.4291
'62108-68-3	1.4295	1.4305
'62108-69-4	1.4289	1.4316
'62108-70-7	1.4343	1.4339
'62168-25-6	1.4988	1.4894
'622-29-7	1.5526	1.5321
'622-42-4	1.5323	1.538
'622-60-6	1.5058	1.5027
'622-63-9	1.555	1.5582
'622-85-5	1.5014	1.4995
'623-15-4	1.5788	1.4988
'623-22-3	1.5392	1.4891
'623-36-9	1.4488	1.432
'623-40-5	1.445	1.4323
'623-48-3	1.5079	1.5014
'623-65-4	1.4364	1.4554
'623-78-9	1.4215	1.4238
'623-96-1	1.4008	1.4113
'6236-88-0	1.4304	1.4381
'624-17-9	1.4351	1.4394
'624-20-4	1.5024	1.4847
'624-42-0	1.4209	1.4147
'624-49-7	1.4062	1.4423
'624-54-4	1.4096	1.4169
'624-64-6	1.3848	1.4005
'624-67-9	1.4033	1.4107
'624-83-9	1.3694	1.3764
'625-01-4	1.416	1.4283
'625-06-9	1.4172	1.4204
'625-25-2	1.425	1.4277
'625-36-5	1.4549	1.4446
'625-56-9	1.409	1.4089
'625-58-1	1.3852	1.3832
'625-68-3	1.4221	1.4457
'625-96-7	1.4456	1.4468
'626-20-0	1.5586	1.5231
'626-26-6	1.4506	1.4526
'626-29-9	1.4335	1.4538
'626-85-7	1.431	1.4482
'626-95-9	1.4452	1.4357
'626-96-0	1.4257	1.414
'626-97-1	1.4183	1.4334
'627-05-4	1.4303	1.4073
'627-08-7	1.376	1.3903
'627-09-8	1.4187	1.4233
'627-13-4	1.3973	1.3974
'627-22-5	1.4712	1.4624
'627-32-7	1.5585	1.5312
'627-37-2	1.4065	1.424
'627-48-5	1.3788	1.3742
'627-59-8	1.418	1.4175
'627-70-3	1.4535	1.4309
'627-97-4	1.417	1.4254
'627-98-5	1.4175	1.4202
'6270-16-2	1.4414	1.4299
'6270-34-4	1.4682	1.4627
'628-02-4	1.42	1.4377
'628-05-7	1.4175	1.4153
'628-37-5	1.3715	1.3713
'628-44-4	1.428	1.4314
'628-61-5	1.4273	1.4256
'628-80-8	1.3862	1.393
'628-83-1	1.436	1.4758
'628-97-7	1.4347	1.4421
'629-36-7	1.4158	1.44
'629-37-8	1.4322	1.4301
'629-46-9	1.4127	1.4185
'629-70-9	1.4438	1.4421
'6294-34-4	1.488	1.4659
'63-75-2	1.486	1.4899
'630-01-3	1.4357	1.4462
'630-02-4	1.433	1.4476
'630-04-6	1.4278	1.4494
'630-06-8	1.4397	1.4518
'630-17-1	1.437	1.441
'631-57-2	1.3764	1.3917
'632-05-3	1.568	1.5316
'632-15-5	1.5206	1.528
'632-16-6	1.5192	1.528
'636-41-9	1.5035	1.5084
'636-53-3	1.508	1.5087
'6379-72-2	1.5616	1.5189
'638-00-6	1.5104	1.528
'638-08-4	1.4362	1.4566
'638-37-9	1.4262	1.4107
'638-53-9	1.4286	1.4479
'638-65-3	1.4389	1.4455
'638-68-6	1.4352	1.4489
'6380-23-0	1.5711	1.5155
'6382-13-4	1.4342	1.4471
'64-17-5	1.3611	1.362
'64-19-7	1.372	1.3869
'64168-11-2	1.4804	1.4918
'644-30-4	1.4989	1.5032
'645-56-7	1.5379	1.533
'645-66-9	1.4292	1.4517
'646-05-9	1.4496	1.4429
'646-14-0	1.427	1.4214
'646-31-1	1.4283	1.4446
'65-85-0	1.504	1.5693
'653-37-2	1.4506	1.4359
'6553-48-6	1.4451	1.454
'65530-93-0	1.4249	1.4275
'66-99-9	1.6211	1.614
'661-11-0	1.3854	1.3855
'662-01-1	1.303	1.3214
'6628-21-3	1.4482	1.4453
'66325-11-9	1.5127	1.5185
'673-79-0	1.4655	1.4717
'674-82-8	1.4379	1.4324
'676-83-5	1.494	1.4684
'6776-19-8	1.4242	1.4309
'6789-80-6	1.43	1.437
'67952-57-2	1.413	1.4213
'68-11-1	1.508	1.5117
'681-84-5	1.3683	1.3823
'6812-78-8	1.4556	1.4482
'6829-40-9	1.4353	1.4462
'683-08-9	1.4101	1.4079
'683-50-1	1.431	1.4155
'683-68-1	1.5662	1.5398
'685-63-2	1.378	1.2865
'6852-54-6	1.5378	1.5244
'689-89-4	1.5025	1.4619
'689-97-4	1.4161	1.4234
'690-08-4	1.3982	1.4248
'690-93-7	1.4063	1.4294
'692-24-0	1.4001	1.4204
'692-45-5	1.3842	1.3986
'692-47-7	1.427	1.4361
'6921-35-3	1.3965	1.4062
'6923-20-2	1.4549	1.4664
'693-61-8	1.4292	1.4385
'693-62-9	1.4285	1.4385
'693-72-1	1.4499	1.4647
'693-93-6	1.4317	1.439
'694-05-3	1.48	1.5019
'694-51-9	1.4441	1.4371
'697-11-0	1.298	1.2858
'6975-98-0	1.4154	1.4197
'698-01-1	1.5578	1.545
'6982-25-8	1.431	1.4256
'699-17-2	1.4696	1.4685
'699-30-9	1.324	1.3433
'70-22-4	1.516	1.5248
'700-88-9	1.528	1.5271
'70116-68-6	1.4089	1.4027
'7045-71-8	1.4191	1.4231
'706-78-5	1.566	1.5852
'706-79-6	1.3676	1.3786
'70644-46-1	1.5466	1.5562
'7069-38-7	1.4471	1.4601
'70715-19-4	1.482	1.4868
'7081-78-9	1.4053	1.4005
'7094-26-0	1.4382	1.4408
'71-55-6	1.4379	1.4563
'7116-86-1	1.4049	1.4213
'7119-94-0	1.4954	1.4845
'713-36-0	1.5763	1.5816
'7145-20-2	1.4268	1.4216
'7146-60-3	1.4146	1.4136
'7154-79-2	1.4236	1.4134
'7154-80-5	1.417	1.4158
'71563-86-5	1.481	1.4974
'7239-24-9	1.3907	1.4123
'7318-67-4	1.4049	1.4381
'7328-33-8	1.4918	1.4637
'7335-26-4	1.5224	1.5063
'7357-93-9	1.41	1.4086
'7385-78-6	1.3992	1.4101
'7385-82-2	1.4006	1.4217
'74-88-4	1.5308	1.5095
'74-90-8	1.2614	1.2643
'74-97-5	1.4838	1.4616
'74-99-7	1.3863	1.3774
'74112-36-0	1.4146	1.4233
'7415-31-8	1.4719	1.4612
'7433-56-9	1.4243	1.436
'7443-55-2	1.458	1.4568
'74683-66-2	1.4353	1.429
'74742-10-2	1.4326	1.4323
'74778-22-6	1.4248	1.4251
'7493-82-5	1.4263	1.4313
'75-07-0	1.3316	1.3442
'75-11-6	1.7411	1.6515
'75-15-0	1.6277	1.7524
'75-19-4	1.3799	1.3728
'75-21-8	1.3597	1.3475
'75-28-5	1.3518	1.3626
'75-37-6	1.3011	1.2597
'75-50-3	1.3631	1.3858
'75-81-0	1.5662	1.5485
'75-82-1	1.4456	1.4448
'75-86-5	1.3992	1.4256
'75-87-6	1.458	1.4803
'75-88-7	1.309	1.3042
'75-89-8	1.2907	1.2826
'75-91-2	1.4015	1.4006
'75-97-8	1.3952	1.4044
'7525-62-4	1.5351	1.5217
'756-79-6	1.4099	1.3912
'7564-63-8	1.538	1.5217
'757-58-4	1.4273	1.4491
'7572-29-4	1.4279	1.4824
'76-02-8	1.4695	1.5011
'76-03-9	1.4603	1.511
'76-06-2	1.4611	1.4907
'76-13-1	1.3557	1.3873
'76-14-2	1.3092	1.3322
'76-15-3	1.2678	1.2712
'76-17-5	1.3512	1.3658
'76-36-8	1.4755	1.4733
'76-38-0	1.3861	1.3834
'760-79-2	1.4391	1.4266
'760-93-0	1.454	1.4485
'762-49-2	1.4236	1.3934
'762-50-5	1.3775	1.3472
'762-63-0	1.4026	1.4248
'762-75-4	1.379	1.4008
'7623-13-4	1.4764	1.4691
'764-42-1	1.4349	1.461
'764-47-6	1.3908	1.4001
'764-96-5	1.4302	1.4385
'764-97-6	1.4285	1.4385
'765-05-9	1.4346	1.4343
'765-34-4	1.4265	1.4014
'765-47-9	1.4448	1.4466
'766-05-2	1.4505	1.4546
'766-07-4	1.4645	1.4566
'766-94-9	1.5224	1.5271
'7661-55-4	1.6219	1.5936
'7667-60-9	1.4341	1.4355
'767-12-4	1.4606	1.4611
'767-58-8	1.5266	1.5378
'767-59-9	1.5616	1.5726
'767-60-2	1.5621	1.5724
'767-99-7	1.5402	1.5241
'768-00-3	1.5425	1.5241
'77-15-6	1.521	1.5353
'77-42-9	1.5115	1.4983
'77-47-4	1.5658	1.5898
'77-53-2	1.4824	1.4999
'77-78-1	1.3874	1.3942
'77-81-6	1.425	1.4442
'7705-14-8	1.4727	1.4734
'777-37-7	1.5083	1.4943
'7779-27-3	1.458	1.4875
'7786-44-9	1.4598	1.4756
'779-02-2	1.6959	1.644
'78-13-7	1.4307	1.4365
'78-38-6	1.4163	1.4138
'78-53-5	1.4655	1.4734
'78-80-8	1.414	1.425
'78-89-7	1.439	1.4233
'78-94-4	1.4081	1.4041
'78-97-7	1.4058	1.4099
'78-98-8	1.4002	1.3903
'78-99-9	1.4289	1.4244
'78918-91-9	1.3854	1.3981
'79-01-6	1.4773	1.4929
'79-04-9	1.453	1.44
'79-05-0	1.418	1.4194
'79-08-3	1.4804	1.4923
'79-21-0	1.3974	1.3892
'79-22-1	1.3868	1.3965
'79-35-6	1.383	1.3916
'79-55-0	1.455	1.4603
'79-69-6	1.5002	1.4854
'79-70-9	1.5162	1.4849
'79-77-6	1.5198	1.4886
'80-42-2	1.5035	1.5132
'80-56-8	1.4632	1.4585
'80-59-1	1.433	1.4531
'80-63-7	1.442	1.4331
'81-13-0	1.497	1.4931
'812-03-3	1.4867	1.4785
'813-78-5	1.408	1.4106
'814-68-6	1.4343	1.4352
'815-24-7	1.4194	1.4222
'815-58-7	1.5271	1.5228
'817-91-4	1.4253	1.4251
'817-95-8	1.4039	1.4046
'821-07-8	1.5135	1.4597
'821-08-9	1.5035	1.4704
'821-76-1	1.4565	1.4438
'821-98-7	1.4302	1.4385
'821-99-8	1.4586	1.4477
'822-28-6	1.4444	1.4443
'822-50-4	1.412	1.4208
'822-85-5	1.5085	1.5001
'823-76-7	1.4565	1.4492
'825-25-2	1.5215	1.4928
'825-51-4	1.4992	1.4946
'825-94-5	1.5418	1.5567
'82584-73-4	1.4841	1.4633
'828-00-2	1.431	1.4392
'83-32-9	1.6048	1.6348
'83-42-1	1.5377	1.5625
'85-97-2	1.6237	1.6458
'86-21-5	1.5519	1.5579
'86-26-0	1.5641	1.5865
'86-28-2	1.6394	1.6252
'86-89-5	1.5725	1.5521
'868-85-9	1.4036	1.3696
'869-29-4	1.4193	1.4336
'87-41-2	1.536	1.5751
'87-64-9	1.5449	1.5769
'87-66-1	1.561	1.6719
'87-68-3	1.5542	1.5575
'871-28-3	1.4125	1.4314
'873-49-4	1.5285	1.536
'874-79-3	1.5571	1.555
'877-44-1	1.5024	1.4988
'88-75-5	1.5723	1.5921
'880-09-1	1.482	1.5056
'89-75-8	1.5895	1.5902
'89-96-3	1.5218	1.5312
'89583-12-0	1.5043	1.4816
'90-14-2	1.7026	1.6857
'90-15-3	1.6224	1.6452
'91-14-5	1.5767	1.5425
'91-19-0	1.6231	1.6079
'91-57-6	1.6015	1.5944
'91-73-6	1.6065	1.6199
'91-79-2	1.5915	1.577
'91-80-5	1.5915	1.577
'91-81-6	1.576	1.5673
'91049-43-3	1.4397	1.4357
'917-93-1	1.416	1.424
'91840-99-2	1.4366	1.4445
'91890-87-8	1.436	1.4437
'919-86-8	1.5063	1.5042
'92-52-4	1.588	1.6049
'92-71-7	1.6231	1.6217
'920-46-7	1.4435	1.4346
'921-47-1	1.4144	1.4066
'922-65-6	1.44	1.4494
'923-26-2	1.4458	1.4423
'923-99-9	1.4282	1.4365
'924-43-6	1.371	1.3861
'925-15-5	1.425	1.4326
'926-02-3	1.3922	1.4091
'926-56-7	1.4532	1.4329
'926-63-6	1.386	1.408
'926-65-8	1.384	1.3968
'927-73-1	1.4233	1.4244
'927-80-0	1.3796	1.3969
'928-45-0	1.4013	1.4075
'928-92-7	1.4402	1.4461
'928-97-2	1.4374	1.4461
'929-77-1	1.4339	1.4471
'93-71-0	1.4932	1.4818
'93-91-4	1.5678	1.5235
'930-18-7	1.3829	1.3976
'930-55-2	1.488	1.4545
'930-66-5	1.4797	1.4889
'930-89-2	1.4293	1.426
'930-90-5	1.4219	1.426
'931-20-4	1.482	1.471
'931-87-3	1.4698	1.4811
'931-89-5	1.4741	1.4811
'932-43-4	1.4343	1.4302
'932-44-5	1.4274	1.4302
'934-53-2	1.529	1.5203
'935-05-7	1.4989	1.5182
'937-33-7	1.527	1.5169
'938-16-9	1.5086	1.5067
'939-52-6	1.5459	1.5265
'94-11-1	1.5209	1.5274
'94-13-3	1.505	1.5327
'94-59-7	1.5381	1.5547
'940-41-0	1.5185	1.528
'948-32-3	1.4896	1.4861
'95-15-8	1.6374	1.6325
'95-48-7	1.5386	1.5549
'95-93-2	1.479	1.5086
'950-10-7	1.5354	1.5319
'96-34-4	1.4218	1.4089
'96-39-9	1.4512	1.4879
'96-40-2	1.4708	1.479
'96-49-1	1.4148	1.409
'96-80-0	1.4417	1.4395
'97-00-7	1.5857	1.5922
'98-54-4	1.4787	1.5252
'98-81-7	1.5881	1.574
'99-48-9	1.4942	1.4917
'99-63-8	1.57	1.5744
'99-79-6	1.525	1.5248
'99-84-3	1.4754	1.4734
'99-93-4	1.5577	1.5586
'994-05-8	1.3862	1.3934
'994-49-0	1.434	1.42
'998-29-8	1.428	1.4124
'998-40-3	1.4619	1.4446
'998-93-6	1.4495	1.4438
'998-95-8	1.4237	1.4212
'999-52-0	1.4228	1.4212
'999-78-0	1.4071	1.4311

## Sheet: Table S4
Table S4. Experimental and predicted values of the refractive index for the QSPR training set introduced by Redmond and Thompson [PCCP 2011, Vol. 13, pp. 6872-6882].
Exp. = Experimental values from Redmond & Thompson database
GF = Values calculated using the GF model
QSPR = Values fitted by Redmond & Thompson during training the QSPR
GC = Values calculated using the Group Contribution model of Cai. Et al. [Env. Sci. Technol. 2017, 51 (17), pp 9683–9690]
	Exp.	GF	QSPR	GC
ACIDS
Acetic acid	1.372	1.3869	1.369	1.371
Glutaric acid	1.419	1.4709	1.425	1.463
Pyruvic acid	1.428	1.4261	1.413	1.429
4-Oxopentanoic acid	1.44	1.439	1.427	1.434
4-Acetylbutyric acid	1.445	1.4429	1.433	1.435
Benzoic acid	1.504	1.5693	1.486	1.545
m-Toluic acid	1.509	1.5586	1.531	1.545
o-Toluic acid	1.512	1.5586	1.531	1.545
ALCOHOLS
1,2-Pentanediol	1.44	1.4357	1.365	1.428
Benzyl alcohol	1.54	1.5502	1.492	1.501
Phenol	1.541	1.5667	1.487	1.5
4-Methyl-2-nitrophenol	1.574	1.5778	1.53	1.544
ALDEHYDES
Acetaldehyde	1.332	1.3442	1.368	1.437
Propionaldehyde	1.362	1.3708	1.381	1.421
Isobutyraldehyde	1.374	1.384	1.391	1.369
Trimethylacetaldehyde	1.378	1.4003	1.397	1.344
Glyoxal	1.383	1.3785	1.394	1.589
Butanal	1.384	1.3879	1.39	1.421
3-Methylbutanal	1.39	1.3964	1.397	1.369
2-Methylbutyraldehyde	1.392	1.3964	1.397	1.369
Valeraldehyde	1.394	1.3998	1.396	1.421
Pentanal	1.394	1.3998	1.396	1.427
Acrolein	1.402	1.3975	1.409	1.482
Hexanal	1.404	1.4087	1.432	1.428
Heptaldehyde	1.413	1.4155	1.405
2-Methylpropenal	1.414	1.4041	1.419	1.408
Methacrolein	1.416	1.4041	1.419	1.408
Nonanal	1.427	1.4252	1.412	1.429
trans-2-Butenal	1.437	1.4252	1.418	1.468
trans-2-Methyl-2-butenal	1.448	1.4263	1.425	1.502
3-Furancarboxaldehyde	1.495	1.4761	1.485	1.634
m-Tolualdehyde	1.541	1.5329	1.529	1.551
3-Methylbenzaldehyde	1.541	1.5329	1.529	1.551
p-Tolualdehyde	1.545	1.5329	1.529	1.551
4-Methylbenzaldehyde	1.545	1.5329	1.529	1.551
Benzaldehyde	1.546	1.5392	1.523	1.559
o-Tolualdehyde	1.547	1.5329	1.528	1.551
3-Methoxybenzaldehyde	1.553	1.5265	1.53	1.529
4-Hydroxybenzaldehyde	1.571	1.5802	1.525	1.587
2-Hydroxybenzaldehyde	1.573	1.5802	1.525	1.587
ALKENES
Propene	1.357	1.3685	1.386	1.326
Ethene	1.363	1.3194	1.36	1.311
3-Methyl-1-butene	1.364	1.3959	1.398	1.368
1-Pentene	1.372	1.3995	1.397	1.378
3,3-Dimethyl-1-butene	1.376	1.409	1.402	1.4
4-Methyl-1-pentene	1.383	1.4055	1.402	1.38
1-Hexene	1.384	1.4087	1.402	1.388
3-Methyl-1-pentene	1.384	1.4055	1.402	1.38
trans-2-Butene	1.385	1.4005	1.391	1.363
2-Methyl-2-butene	1.387	1.4055	1.396	1.421
2-Methyl-1-pentene	1.392	1.4039	1.401	1.4
cis-2-Butene	1.393	1.4005	1.39	1.363
trans-3-Hexene	1.394	1.4188	1.401	1.39
cis-3-Hexene	1.395	1.4188	1.401	1.39
2-Ethyl-1-butene	1.397	1.4039	1.401	1.4
2,3-Dimethyl-1-butene	1.4	1.4008	1.401	1.392
Heptene	1.4	1.4157	1.405	1.395
2,3,3-Trimethyl-1-butene	1.403	1.4117	1.405	1.415
2,4-Dimethyl-2-pentene	1.404	1.4175	1.405	1.417
1-Octene	1.409	1.4212	1.409	1.4
trans-4-Octene	1.411	1.4293	1.409	1.402
2,3-Dimethyl-2-butene	1.412	1.4091	1.4	1.338
cis-4-Octene	1.415	1.4293	1.408	1.402
2,4,4-Trimethyl-2-pentene	1.416	1.4256	1.408	1.434
1-Decene	1.422	1.4293	1.414	1.407
Isoprene	1.422	1.4145	1.426	1.419
trans-5-Decene	1.424	1.436	1.414	1.408
cis-5-Decene	1.426	1.436	1.414	1.408
1,3-Butadiene	1.429	1.411	1.42	1.383
cis-1,3-Pentadiene	1.436	1.4331	1.425	1.402
Cyclohexene	1.447	1.4681	1.427	1.457
1-Methylcyclohexene	1.45	1.4629	1.433	1.482
Vinylcyclohexane	1.455	1.4549	1.437	1.442
Cycloheptene	1.455	1.4832	1.432	1.453
Camphene (a)	1.456	1.4702	1.474	1.487
Camphene (+)	1.457	1.4702	1.473	1.487
a-Pinene	1.463	1.4585	1.474	1.487
Limonene (d)	1.473	1.4734	1.474	1.487
Limonene (l)	1.475	1.4734	1.474	1.487
b-Pinene	1.477	1.4505	1.474	1.487
b-Phellandrene	1.479	1.4742	1.474
Terpinolene	1.488	1.4809	1.474	1.491
AROMATICS
Toluene	1.496	1.5155	1.493	1.5
Naphthalene	1.59	1.6083	1.595	1.565
Phenanthrene	1.594	1.6605	1.702	1.594
2-Methylnaphthalene	1.602	1.5944	1.599	1.559
Acenaphthene	1.605	1.6348	1.629	1.603
KETONES
Acetone	1.359	1.3631	1.382	1.359
2-Butanone	1.379	1.3816	1.39	1.377
3-Methyl-2-butanone	1.388	1.3912	1.397	1.379
2-Pentanone	1.39	1.3945	1.396	1.387
3-Pentanone	1.391	1.3945	1.396	1.394
3,3-Dimethyl-2-butanone	1.395	1.4044	1.404	1.393
2,4-Dimethyl-3-pentanone	1.4	1.406	1.406	1.404
3-Buten-2-one	1.408	1.4041	1.418	1.397
Methyl vinyl ketone	1.411	1.4041	1.418	1.397
5-Hexen-2-one	1.418	1.4215	1.432	1.397
(1R)-(+)-Nopinone	1.479	1.4474	1.471
4-Methylacetophenone	1.534	1.5203	1.533
Acetophenone	1.537	1.524	1.528	1.535
MISCELLANEOUS
Adipic acid monomethyl ester	1.441	1.4442	1.439	1.436
Furfural	1.526	1.4761	1.483	1.781
3-Hydroxy-2-butanone	1.417	1.4119	1.39	1.428
Furan	1.421	1.4399	1.444	1.523
Diethyl pimelate	1.43	1.4352	1.45	1.426
2-Methylfuran	1.434	1.4499	1.454	1.54
5-Methyl-2(5H)-furanone	1.445	1.4626	1.455	1.431
5-Methyl-2(3H)-furanone	1.448	1.4611	1.455	1.517
Paramethadione	1.449	1.4698	1.47
3-Methyl-2,5-furandione	1.471	1.48	1.486	1.531
Citraconic anhydride	1.471	1.48	1.486	1.531

## Sheet: Table S5
Table S5. Experimental and predicted values of the refractive index for the GC training set introduced by Cai et al. [Env. Sci. Technol. 2017, 51 (17), pp 9683–9690]
Exp. = Experimental values from Cai et al. database [Env. Sci. Technol. 2017, 51 (17), pp 9683–9690]
GF = Predicted GF values
GC = Values fitted by Cai et al. when training the GC method
CASRN	Exp.	GF	GC
Training set for Model 1
pentane	1.358	1.381	1.365
hexane	1.375	1.3921	1.376
heptane	1.387	1.4007	1.384
n-octane	1.398	1.4075	1.389
nonane	1.405	1.4131	1.394
decane	1.411	1.4177	1.398
undecane	1.417	1.4215	1.401
dodecane	1.421	1.4249	1.403
3-methylheptane	1.398	1.4051	1.384
2,2,4-trimethylpentane	1.391	1.4054	1.392
cyclopentane	1.405	1.4129	1.431
cyclohexane	1.426	1.4325	1.431
methylcyclohexane	1.422	1.4338	1.425
ethylcyclohexane	1.432	1.4377	1.426
isopropylcyclohexane	1.441	1.4381	1.417
1-pentene	1.371	1.3995	1.378
2-pentene	1.38	1.4111	1.38
1-hexene	1.388	1.4087	1.388
1-heptene	1.4	1.4157	1.395
trans-1,3-pentadiene	1.43	1.4331	1.402
isoprene	1.422	1.4145	1.419
3-methyl-1,3-pentadiene	1.451	1.4329	1.451
2-methyl-1,3-pentadiene	1.445	1.4329	1.425
2,3-dimethyl-1,3-butadiene	1.438	1.417	1.438
1-pentyne	1.385	1.408	1.393
1-hexyne	1.399	1.4166	1.399
1-heptyne	1.408	1.423	1.404
cyclohexene	1.446	1.4681	1.457
formic acid	1.37	1.3689	1.364
acetic acid	1.371	1.3869	1.371
methyl formate	1.343	1.3506	1.343
propionic acid	1.386	1.4048	1.394
ethyl formate	1.359	1.3738	1.368
methyl acetate	1.361	1.3668	1.348
acetic anhydride	1.39	1.3987	1.379
ethyl acetate	1.372	1.3835	1.372
butyric acid	1.398	1.4162	1.406
methyl propionate	1.376	1.3835	1.37
ethyl propionate	1.384	1.3954	1.386
amyl formate	1.399	1.4088	1.399
paraldehyde	1.405	1.4197	1.467
pentyl acetate	1.402	1.4113	1.401
ethyl sorbate	1.494	1.4625	1.434
diethyl succinate	1.42	1.4258	1.42
diketene	1.439	1.4324	1.513
acetaldehyde	1.332	1.3442	1.339
acetone	1.359	1.3631	1.359
propionaldehyde	1.364	1.3708	1.369
crotonaldehyde	1.437	1.4252	1.411
formamide	1.447	1.3982	1.447
acetonitrile	1.344	1.3425	1.335
propionitrile	1.366	1.371	1.366
butyronitrile	1.384	1.3889	1.382
isobutyronitrile	1.372	1.3848	1.372
valeronitrile	1.397	1.4012	1.392
acrylonitrile	1.391	1.3995	1.392
allyl alcohol	1.412	1.4129	1.412
pyrimidine	1.504	1.506	1.504
pyridazine	1.524	1.506	1.504
pyridine	1.509	1.5132	1.536
propylamine	1.388	1.4004	1.402
isopropylamine	1.374	1.3959	1.392
butylamine	1.401	1.4116	1.408
diethylamine	1.385	1.4022	1.385
triethylamine	1.401	1.4152	1.401
dipropylamine	1.4049	1.4181	1.398
tripropylamine	1.416	1.429	1.389
tetranitromethane	1.438	1.4988	1.438
nitromethane	1.382	1.3564	1.382
nitroethane	1.391	1.3809	1.391
nitropropane	1.401	1.3965	1.401
1-nitrobutane	1.41	1.4073	1.407
2-methyl-2-nitropropane	1.4	1.4077	1.392
ethylene oxide	1.3597	1.3475	1.422
ethylene glycol	1.431	1.4157	1.427
ethanethiol	1.4306	1.4399	1.431
dimethyl carbonate	1.368	1.3699	1.368
dimethoxymethane	1.354	1.354	1.354
1,4-dioxane	1.422	1.416	1.422
1-butanol	1.399	1.3994	1.396
diethyl carbonate	1.384	1.3962	1.399
tetramethyl orthocarbonate	1.385	1.3869	1.385
cyclohexanol	1.465	1.4593	1.46
methanol	1.329	1.3219	1.329
2-propanol	1.377	1.3801	1.377
1-propanol	1.384	1.3848	1.385
Training set for Model 2
benzene	1.501	1.5195	1.5
toluene	1.496	1.5155	1.5
ethylbenzene	1.495	1.5088	1.495
o-xylene	1.505	1.5126	1.499
p-xylene	1.495	1.5126	1.499
m-xylene	1.497	1.5126	1.499
1,3,5-trimethylbenzene (Mesitylene)	1.499	1.5104	1.499
1,3,6-trimethylbenzene (Mesitylene)	1.499	1.5104	1.499
isopropylbenzene (Cumene)	1.491	1.5002	1.491
tert-butylbenzene	1.492	1.4994	1.492
styrene	1.546	1.5337	1.546
Î±-methylstyrene	1.538	1.5206	1.5
hexafluorobenzene	1.377	1.3916	1.381
pentafluorobenzene	1.391	1.408	1.392
1,2,3,4-tetrafluorobenzene	1.408	1.426	1.404
1,2,4,5-tetrafluorobenzene	1.407	1.426	1.404
1,3,5-trifluorobenzene	1.414	1.4458	1.42
o-difluorobenzene	1.443	1.4677	1.439
m-difluorobenzene	1.441	1.4677	1.439
p-difluorobenzene	1.438	1.4677	1.439
fluorobenzene	1.465	1.4921	1.465
p-fluorotoluene	1.469	1.4924	1.469
o-dichlorobenzene	1.551	1.5716	1.546
m-dichlorobenzene	1.549	1.5716	1.546
p-dichlorobenzene	1.546	1.5716	1.546
chlorobenzene	1.524	1.5483	1.526
p-chlorotoluene	1.522	1.5405	1.522
bromobenzene	1.559	1.5831	1.559
p-bromotoluene	1.552	1.5705	1.551
Î±-bromonaphthalene	1.657	1.6488	1.537
p-fluoroiodobenzene	1.584	1.6057	1.571
iodobenzene	1.62	1.6343	1.62
p-iodotoluene	1.604	1.6154	1.604
Î±-iodonaphthalene	1.701	1.6857	1.638
nitrobenzene	1.551	1.5499	1.551
nitroanisole	1.561	1.5351	1.554
quinoline	1.625	1.6081	1.625
isoquinoline	1.623	1.6081	1.625
2-methylquinoline	1.62	1.5936	1.612
1-methylisoquinoline	1.614	1.5936	1.578
benzonitrile	1.528	1.5469	1.528
acetophenone	1.535	1.524	1.535
1-naphthaldehyde	1.652	1.614	1.652
ethyl benzoate	1.504	1.5121	1.504
phenylhydrazine	1.607	1.594	1.607
o-anisidine	1.574	1.5494	1.58
aniline	1.586	1.5694	1.584
N-dimethylaniline	1.557	1.5253	1.557
anisole	1.516	1.5094	1.516
phenetole	1.507	1.5038	1.507
chlorophenol	1.558	1.5913	1.558
4-bromodiphenyl ether	1.607	1.6299	1.607
Training set for halogen compounds
trichlorofluoromethane	1.3821	1.4235	1.392
chloroform	1.445	1.4487	1.445
dichloromethane	1.424	1.4093	1.408
fluoropentane	1.36	1.3624	1.36
fluoroheptane	1.386	1.3855	1.386
fluorododecane	1.42	1.4145	1.417
carbon tetrachloride	1.46	1.4877	1.46
1,1,2,2-tetrachloroethane	1.494	1.4762	1.468
1,2-dichloroethane	1.444	1.4207	1.422
dichloropropane	1.428	1.4286	1.423
chloropropane	1.388	1.3916	1.389
1,4-dichlorobutane	1.454	1.4339	1.437
1-chlorobutane	1.402	1.4034	1.405
2-chlorobutane	1.396	1.3999	1.396
1-chloropentane	1.412	1.412	1.415
carbon,tetrachloride	1.46	1.4877	1.46
2-chloro-2-methylpropane	1.385	1.4038	1.38
pentachloroethane	1.502	1.5035	1.475
1,1,1-trichloroethane	1.4366	1.4563	1.433
dibromodifluoromethane	1.398	1.4404	1.398
bromoform	1.595	1.5761	1.595
dibromomethane	1.541	1.5118	1.536
1,2-dibromoethane	1.539	1.5033	1.519
bromoethane	1.425	1.4235	1.425
1-bromopropane	1.434	1.4315	1.436
2-bromopropane	1.425	1.427	1.424
bromobutane	1.437	1.4369	1.442
1-bromopentane	1.444	1.441	1.446
bromohexane	1.448	1.4441	1.449
1-bromoheptane	1.4499	1.4465	1.452
bromooctane	1.452	1.4485	1.453
bromononane	1.454	1.4501	1.455
bromodecane	1.456	1.4515	1.456
bromohexadecane	1.461	1.4566	1.46
iodomethane	1.531	1.5095	1.536
1-iodopropane	1.504	1.4951	1.502
iodoethane	1.513	1.5008	1.513
1-iodobutane	1.498	1.4911	1.495
chloroethylene (Vinyl chloride)	1.37	1.4031	1.37
dichloropropene	1.472	1.4601	1.472
chloropropene	1.395	1.431	1.395
1-chloro-2-methylpropene	1.424	1.4312	1.424
trichloroacetonitrile	1.441	1.4857	1.469
chloroacetonitrile	1.422	1.4058	1.422
methyl chloroformate	1.387	1.3965	1.387
ethyl chloroformate	1.395	1.4089	1.407
2-chlorobutyric acid	1.439	1.4457	1.439
4-chlorobutyric acid	1.451	1.4499	1.451
chloroacetyl chloride	1.453	1.44	1.453
acetyl chloride	1.389	1.3952	1.389
chloroacetone	1.432	1.4088	1.419
thiophosgene	1.548	1.5913	1.548
2-chloroethanol	1.441	1.4187	1.441
Î²-chloroethyl methyl ether	1.408	1.3929	1.408

## Sheet: Table S6
Table S6. Experimental and predicted values of the refractive index for all compounds with experimental density available from Ind. Eng. Chem. Res. 2016, Vol. 55, pp. 12970-12980
Exp. = Experimental values from TCI database
GF = Values predicted using the present GF method
GC = Values predicted using the QSPR method
CASRN	Exp.	GF	QSPR
356-27-4	1.303	1.3122	1.5202
376-27-2	1.304	1.2894	1.6562
383-63-1	1.3075	1.3277	1.4465
355-80-6	1.3175	1.2892	1.4988
76-37-9	1.321	1.2941	1.4207
67-56-1	1.3285	1.3219	1.3145
1522-22-1	1.3335	1.3108	1.5305
421-83-0	1.335	1.3491	1.4275
381-73-7	1.3435	1.3181	1.4058
107-31-3	1.344	1.3506	1.3733
60-29-7	1.353	1.3689	1.3635
109-87-5	1.3545	1.354	1.3576
78-78-4	1.3545	1.3779	1.3673
557-17-5	1.356	1.3689	1.363
109-66-0	1.358	1.381	1.3671
67-64-1	1.359	1.3631	1.3818
109-94-4	1.361	1.3738	1.3857
79-20-9	1.361	1.3668	1.3852
625-54-7	1.363	1.3796	1.3689
123-38-6	1.3655	1.3708	1.3816
75-56-9	1.366	1.3712	1.3798
107-12-0	1.366	1.371	1.412
534-15-6	1.367	1.3681	1.3643
434-64-0	1.3675	1.3699	1.6271
625-55-8	1.368	1.3857	1.3938
108-20-3	1.3685	1.3876	1.3733
616-38-6	1.369	1.3699	1.3878
628-32-0	1.3695	1.3826	1.3686
1634-04-4	1.3695	1.3832	1.3682
75-83-2	1.37	1.3926	1.3716
141-78-6	1.3715	1.3835	1.3935
542-56-3	1.3715	1.3861	1.3994
462-95-3	1.3715	1.384	1.3699
109-67-1	1.3715	1.3995	1.3972
107-83-5	1.372	1.3893	1.3715
558-30-5	1.372	1.3945	1.39
78-84-2	1.3725	1.384	1.391
598-56-1	1.373	1.3987	1.3652
78-82-0	1.3735	1.3848	1.4223
628-28-4	1.374	1.3826	1.3681
917-92-0	1.375	1.4169	1.4325
110-54-3	1.375	1.3921	1.3712
75-31-0	1.375	1.3959	1.3566
79-29-8	1.3755	1.3865	1.3712
637-92-3	1.3755	1.3934	1.3728
459-72-3	1.376	1.3625	1.409
558-37-2	1.3765	1.409	1.4023
372-31-6	1.3765	1.3681	1.4853
110-74-7	1.3765	1.3893	1.3933
109-92-2	1.3765	1.3884	1.3923
96-14-0	1.377	1.3893	1.3711
75-64-9	1.377	1.412	1.363
544-16-1	1.377	1.3894	1.399
554-12-1	1.377	1.3835	1.393
392-56-3	1.3775	1.3916	1.5895
67-63-0	1.3775	1.3801	1.3517
108-21-4	1.3775	1.3922	1.3996
2679-87-0	1.3775	1.3903	1.3725
630-18-2	1.378	1.4016	1.4291
75-29-6	1.378	1.3876	1.375
623-53-0	1.378	1.3851	1.3951
77-76-9	1.378	1.3846	1.3691
563-46-2	1.3785	1.3939	1.3968
149-73-5	1.3785	1.3705	1.3654
402-31-3	1.379	1.3981	1.5982
78-93-3	1.3795	1.3816	1.3904
123-72-8	1.3795	1.3879	1.3904
630-19-3	1.3795	1.4003	1.3976
627-40-7	1.38	1.3884	1.3916
110-71-4	1.38	1.3713	1.3639
646-04-8	1.38	1.4111	1.3969
105-57-7	1.381	1.3912	1.3739
108-08-7	1.381	1.3956	1.3752
111-43-3	1.381	1.393	1.3726
1738-36-9	1.3815	1.3742	1.4146
628-81-9	1.382	1.393	1.3726
623-49-4	1.382	1.4064	1.457
590-35-2	1.382	1.401	1.375
627-20-3	1.382	1.4111	1.3969
691-37-2	1.3825	1.4055	1.4021
547-63-7	1.3835	1.3922	1.3992
106-88-7	1.384	1.3896	1.3895
109-74-0	1.384	1.3889	1.4214
105-37-3	1.384	1.3954	1.3992
109-60-4	1.3845	1.3954	1.3992
591-76-4	1.3845	1.3981	1.375
760-20-3	1.3845	1.4055	1.4019
542-55-2	1.385	1.3972	1.3995
105-58-8	1.385	1.3962	1.4008
71-23-8	1.385	1.3848	1.351
109-89-7	1.385	1.4022	1.3637
1850-14-2	1.3855	1.3869	1.3717
637-78-5	1.386	1.4015	1.4039
507-20-0	1.386	1.4038	1.3818
540-88-5	1.386	1.4047	1.404
110-46-3	1.3865	1.3966	1.4035
627-19-0	1.3865	1.408	1.4256
79-09-4	1.3865	1.4048	1.3828
513-35-9	1.387	1.4055	1.3964
97-62-1	1.387	1.4015	1.404
142-82-5	1.3875	1.4007	1.3748
623-42-7	1.3875	1.3954	1.3989
592-41-6	1.3875	1.4087	1.4017
557-31-3	1.3875	1.4001	1.3981
590-86-3	1.388	1.3964	1.397
691-38-3	1.388	1.4156	1.4019
563-80-4	1.388	1.3912	1.3961
107-10-8	1.3885	1.4004	1.3551
540-54-5	1.3885	1.3916	1.374
1445-45-0	1.3885	1.3858	1.37
105-46-4	1.389	1.4015	1.4039
110-05-4	1.389	1.4082	1.3809
674-76-0	1.389	1.4156	1.4019
592-84-7	1.389	1.4004	1.3991
75-36-5	1.389	1.3952	1.3963
616-39-7	1.389	1.408	1.3697
126-84-1	1.389	1.4018	1.377
591-93-5	1.389	1.4204	1.4271
463-04-7	1.3895	1.3995	1.4033
464-06-2	1.39	1.3985	1.3747
563-78-0	1.39	1.4008	1.4016
598-98-1	1.39	1.4047	1.4037
107-87-9	1.39	1.3945	1.3968
18936-17-9	1.39	1.3976	1.4277
4744-08-5	1.39	1.3991	1.3771
110-19-0	1.39	1.4015	1.4039
919-94-8	1.391	1.4014	1.3759
363-72-4	1.391	1.408	1.5723
19961-27-4	1.391	1.408	1.369
96-22-0	1.3915	1.3945	1.3966
107-13-1	1.3915	1.3995	1.4405
565-59-3	1.3915	1.3956	1.3745
503-17-3	1.3915	1.4086	1.4167
79-24-3	1.3915	1.3809	1.3807
122-51-0	1.3915	1.3995	1.3782
540-84-1	1.3915	1.4054	1.3782
762-62-9	1.392	1.4159	1.4058
763-29-1	1.392	1.4039	1.4015
592-13-2	1.3925	1.4028	1.3782
556-24-1	1.3925	1.4015	1.4035
78-09-1	1.3925	1.4129	1.3846
503-30-0	1.393	1.3763	1.3762
4050-45-7	1.393	1.4188	1.4016
629-14-1	1.393	1.3938	1.3735
105-54-4	1.393	1.4043	1.4037
625-28-5	1.393	1.3976	1.428
617-78-7	1.393	1.3981	1.3744
79-31-2	1.3935	1.4119	1.3918
590-73-8	1.3935	1.4078	1.3782
106-36-5	1.3935	1.4043	1.4036
7154-75-8	1.3935	1.4132	1.4313
638-11-9	1.394	1.4087	1.4076
13269-52-8	1.3945	1.4188	1.4013
110-62-3	1.3945	1.3998	1.3967
7642-09-3	1.3945	1.4188	1.4013
123-86-4	1.3945	1.4043	1.4037
431-03-8	1.395	1.3979	1.4211
592-27-8	1.395	1.4051	1.3781
79-46-9	1.395	1.3925	1.3905
644-49-5	1.395	1.4087	1.4076
589-43-5	1.395	1.4028	1.3782
401-56-9	1.395	1.3939	1.4306
108-05-4	1.3955	1.4045	1.4232
108-10-1	1.3955	1.401	1.4024
512-56-1	1.396	1.3922	1.3521
6044-68-4	1.396	1.3975	1.3992
3404-61-3	1.396	1.4128	1.4057
108-64-5	1.396	1.4087	1.4076
627-41-8	1.396	1.3969	1.4189
20193-20-8	1.3965	1.4113	1.3687
78-81-9	1.3965	1.4077	1.3626
4637-24-5	1.3965	1.4054	1.3718
109-53-5	1.3965	1.4058	1.4029
1188-33-6	1.3965	1.4176	1.3791
78-83-1	1.3965	1.3954	1.3598
78-92-2	1.397	1.3954	1.3596
540-42-1	1.397	1.4087	1.4074
4447-60-3	1.397	1.4098	1.3861
760-21-4	1.397	1.4039	1.4012
6290-49-9	1.397	1.3851	1.3939
78-39-7	1.397	1.408	1.3809
110-59-8	1.397	1.4012	1.428
624-24-8	1.397	1.4043	1.4033
589-53-7	1.3975	1.4051	1.3779
110-45-2	1.3975	1.4059	1.4035
111-65-9	1.3975	1.4075	1.3779
927-62-8	1.3975	1.4152	1.3736
5878-19-3	1.3975	1.3835	1.3916
513-36-0	1.398	1.3999	1.3806
7688-21-3	1.398	1.4188	1.4016
497-26-7	1.398	1.3984	1.3907
2213-32-3	1.398	1.4086	1.4055
565-69-5	1.398	1.401	1.4018
107-92-6	1.3985	1.4162	1.3916
71-36-3	1.399	1.3994	1.3596
589-81-1	1.399	1.4051	1.378
1072-47-5	1.399	1.3984	1.3902
638-49-3	1.399	1.4088	1.4035
97-85-8	1.399	1.4122	1.4109
594-39-8	1.3995	1.4198	1.3684
693-02-7	1.3995	1.4166	1.4311
625-27-4	1.3995	1.414	1.4013
142-96-1	1.3995	1.4076	1.3791
589-38-8	1.3995	1.404	1.4016
3522-94-9	1.4	1.4111	1.381
111-34-2	1.4	1.4088	1.4027
3769-23-1	1.4	1.4128	1.4055
565-80-0	1.4	1.406	1.406
592-76-7	1.4	1.4157	1.4055
123-92-2	1.4	1.4087	1.4074
64-67-5	1.4005	1.4123	1.3722
646-06-0	1.4005	1.388	1.3796
353-83-3	1.4005	1.4133	1.4256
108-22-5	1.4005	1.4087	1.4293
539-82-2	1.4005	1.4113	1.4073
542-10-9	1.4005	1.413	1.4365
2155-94-4	1.4005	1.4266	1.3997
590-01-2	1.4005	1.4113	1.4074
563-16-6	1.4005	1.4078	1.3778
584-94-1	1.401	1.4028	1.3778
121-44-8	1.401	1.4152	1.3734
108-84-9	1.401	1.4122	1.4107
591-78-6	1.401	1.404	1.4017
402-44-8	1.401	1.425	1.561
115-80-0	1.4015	1.413	1.3834
624-41-9	1.4015	1.4087	1.4072
108-03-2	1.4015	1.3965	1.3901
110-49-6	1.402	1.3962	1.3999
109-69-3	1.402	1.4034	1.3803
109-73-9	1.402	1.4116	1.3624
922-62-3	1.402	1.414	1.4007
3852-09-3	1.4025	1.3962	1.3998
96-33-3	1.4025	1.4045	1.4224
5813-64-9	1.4025	1.4198	1.3682
110-67-8	1.4025	1.3903	1.4229
594-56-9	1.4025	1.4117	1.4053
109-86-4	1.4025	1.3868	1.3534
628-63-7	1.4025	1.4113	1.4074
771-56-2	1.403	1.4188	1.5769
564-02-3	1.403	1.4054	1.3776
3404-72-6	1.403	1.4086	1.4051
3221-61-2	1.403	1.4109	1.3808
6094-02-6	1.403	1.4114	1.4054
625-65-0	1.4035	1.4175	1.4054
97-96-1	1.4035	1.4056	1.4014
600-22-6	1.4035	1.3987	1.4232
66-25-1	1.4035	1.4087	1.4017
2213-23-2	1.4035	1.4087	1.3808
539-90-2	1.4035	1.4145	1.4106
503-74-2	1.4035	1.4203	1.3979
107-98-2	1.4035	1.3964	1.3619
600-14-6	1.4035	1.4086	1.4278
14686-14-7	1.404	1.4247	1.4055
16747-26-5	1.404	1.4111	1.3808
2216-30-0	1.404	1.4087	1.3807
2367-82-0	1.404	1.426	1.5553
609-26-7	1.404	1.4028	1.3775
79-03-8	1.404	1.4088	1.4052
616-12-6	1.404	1.414	1.4007
3188-13-4	1.404	1.3929	1.3758
591-87-7	1.404	1.414	1.429
592-42-7	1.404	1.4271	1.4318
142-84-7	1.404	1.4181	1.373
583-48-2	1.404	1.4028	1.3776
627-21-4	1.404	1.4186	1.4249
13360-63-9	1.4045	1.4181	1.3729
617-35-6	1.4045	1.4087	1.4299
123-51-3	1.4045	1.4062	1.3656
75-85-4	1.4045	1.41	1.3657
7379-12-6	1.4045	1.4087	1.4057
123-63-7	1.4045	1.4197	1.4042
753-89-9	1.4045	1.4123	1.3855
594-36-5	1.405	1.4123	1.3857
123-62-6	1.405	1.4161	1.4349
616-24-0	1.405	1.4161	1.3679
565-75-3	1.405	1.4005	1.3776
96-47-9	1.405	1.4089	1.395
111-84-2	1.4055	1.4131	1.3807
111-15-9	1.4055	1.4046	1.4047
109-75-1	1.4055	1.4131	1.4499
140-88-5	1.4055	1.414	1.4292
926-64-7	1.4055	1.4215	1.4252
78-40-0	1.4055	1.4137	1.3637
106-70-7	1.4055	1.4113	1.407
4437-51-8	1.4055	1.4164	1.4329
589-59-3	1.4055	1.4171	1.4135
6032-29-7	1.406	1.4062	1.3657
2216-33-3	1.406	1.4109	1.3807
2568-90-3	1.406	1.4129	1.3825
1423-60-5	1.406	1.4151	1.4478
2203-80-7	1.406	1.42	1.4355
105-68-0	1.406	1.4145	1.4105
97-72-3	1.406	1.4215	1.4425
542-54-1	1.406	1.407	1.433
2051-30-1	1.406	1.4136	1.3834
287-92-3	1.406	1.4129	1.3927
598-74-3	1.406	1.4128	1.3679
763-69-9	1.4065	1.4113	1.4084
21020-27-9	1.4065	1.4222	1.4308
109-21-7	1.4065	1.4169	1.4106
1070-87-7	1.4065	1.4134	1.3808
629-33-4	1.407	1.4152	1.4073
123-19-3	1.407	1.4114	1.4057
392-85-8	1.407	1.425	1.5608
543-27-1	1.407	1.421	1.4193
110-12-3	1.407	1.4087	1.4058
628-73-9	1.407	1.4101	1.4331
327-54-8	1.407	1.426	1.555
123-66-0	1.407	1.4169	1.4104
107-85-7	1.4075	1.4161	1.3678
102-52-3	1.4075	1.3977	1.3784
110-80-5	1.4075	1.4001	1.3616
544-01-4	1.4075	1.4135	1.3843
6443-92-1	1.4075	1.4247	1.4052
111-96-6	1.4075	1.3945	1.3741
79-30-1	1.4075	1.4144	1.4123
2141-62-0	1.408	1.4017	1.4294
627-42-9	1.408	1.3929	1.375
551-62-2	1.408	1.426	1.5552
1067-08-9	1.408	1.4078	1.3773
4032-86-4	1.408	1.4133	1.3805
2216-32-2	1.408	1.4109	1.3805
4016-11-9	1.408	1.4026	1.3973
107-84-6	1.4085	1.4089	1.3853
107-39-1	1.4085	1.4176	1.4089
142-92-7	1.4085	1.4169	1.4105
616-42-2	1.4085	1.4279	1.3593
628-71-7	1.4085	1.423	1.4355
110-43-0	1.409	1.4114	1.4057
109-52-4	1.409	1.424	1.3977
2532-58-3	1.409	1.4208	1.4041
109-19-3	1.409	1.4193	1.4134
111-66-0	1.409	1.4212	1.4088
106-35-4	1.409	1.4114	1.4057
3074-71-3	1.409	1.4087	1.3805
389-40-2	1.409	1.4184	1.5784
110-96-3	1.409	1.423	1.3799
1467-79-4	1.4095	1.4122	1.4171
110-76-9	1.4095	1.4115	1.364
7319-00-8	1.4095	1.4381	1.4317
2738-19-4	1.41	1.4204	1.405
71-41-0	1.41	1.4097	1.3657
13706-86-0	1.41	1.4195	1.4375
95-92-1	1.41	1.4158	1.4365
96-37-7	1.41	1.4174	1.399
871-83-0	1.41	1.4156	1.3834
1663-39-4	1.41	1.4265	1.4382
109-59-1	1.41	1.4064	1.3676
106-27-4	1.4105	1.4193	1.4133
4914-91-4	1.4105	1.4175	1.4049
590-36-3	1.4105	1.4175	1.3706
10031-87-5	1.4105	1.4145	1.4102
584-02-1	1.4105	1.4062	1.3655
922-28-1	1.4105	1.4087	1.3803
628-34-2	1.411	1.4038	1.3817
122-07-6	1.411	1.4082	1.371
690-92-6	1.411	1.4294	1.4087
110-58-7	1.411	1.4196	1.3678
108-11-2	1.411	1.411	1.3708
928-49-4	1.411	1.4257	1.4308
930-37-0	1.411	1.391	1.3904
1070-83-3	1.411	1.4299	1.4027
623-47-2	1.4115	1.4233	1.4586
124-18-5	1.4115	1.4177	1.3833
2110-78-3	1.4115	1.4235	1.3992
626-23-3	1.4115	1.423	1.3796
17301-94-9	1.4115	1.4156	1.3833
563-79-1	1.4115	1.4091	1.4005
4655-34-9	1.4115	1.4195	1.4382
1569-01-3	1.412	1.4139	1.3724
10160-87-9	1.412	1.4191	1.4379
112-36-7	1.412	1.4078	1.3807
626-77-7	1.412	1.4215	1.4132
693-65-2	1.412	1.4174	1.3842
141-75-3	1.412	1.4181	1.4119
659-70-1	1.412	1.4213	1.416
106-73-0	1.412	1.4169	1.4102
591-68-4	1.412	1.4215	1.4133
14919-01-8	1.4125	1.4293	1.4089
543-87-3	1.4125	1.4121	1.4037
540-18-1	1.4125	1.4215	1.4133
15869-85-9	1.4125	1.4156	1.3833
106-30-9	1.4125	1.4215	1.4132
3850-30-4	1.4125	1.4227	1.3724
15870-10-7	1.4125	1.4174	1.4087
5911-04-6	1.4125	1.4156	1.3833
14850-23-8	1.4125	1.4293	1.4089
4914-92-5	1.413	1.4175	1.4049
13389-42-9	1.413	1.4293	1.4085
609-08-5	1.413	1.4235	1.4432
2445-76-3	1.413	1.4215	1.4132
66-27-3	1.413	1.3931	1.3569
88-09-5	1.413	1.4265	1.4025
543-59-9	1.413	1.412	1.3852
111-71-7	1.413	1.4155	1.4057
624-95-3	1.4135	1.4175	1.3706
106-31-0	1.4135	1.4264	1.4422
2807-30-9	1.4135	1.4097	1.3675
112-06-1	1.4135	1.4215	1.4133
108-83-8	1.4135	1.4174	1.4124
108-59-8	1.4135	1.4088	1.4312
589-63-9	1.4135	1.4172	1.4092
623-84-7	1.4135	1.4188	1.4398
7087-68-5	1.4135	1.4206	1.3796
764-35-2	1.4135	1.4257	1.4305
14850-22-7	1.4135	1.4293	1.4089
598-05-0	1.4135	1.4233	1.3791
928-68-7	1.4135	1.4147	1.4091
372-38-3	1.414	1.4458	1.5387
106-63-8	1.414	1.4235	1.4382
629-08-3	1.414	1.4169	1.4371
97-97-2	1.414	1.401	1.3832
112-48-1	1.414	1.4172	1.3849
105-53-3	1.414	1.4214	1.44
3404-78-2	1.4145	1.4228	1.4086
97-63-2	1.4145	1.4163	1.4339
646-07-1	1.4145	1.4265	1.4024
816-79-5	1.4145	1.4204	1.4046
594-20-7	1.4145	1.4286	1.3958
80-62-6	1.4145	1.4087	1.4285
108-12-3	1.4145	1.4216	1.4174
592-20-1	1.4145	1.4087	1.4291
96-04-8	1.4145	1.4224	1.4373
1632-16-2	1.4145	1.4174	1.4085
106-68-3	1.4145	1.4172	1.4091
626-89-1	1.415	1.4141	1.3705
1120-97-4	1.415	1.4204	1.3964
372-46-3	1.415	1.4072	1.4142
107-05-1	1.415	1.4159	1.4027
7642-15-1	1.415	1.4293	1.4089
98-08-8	1.4155	1.4417	1.5446
595-37-9	1.4155	1.4299	1.4023
629-05-0	1.4155	1.428	1.4391
111-13-7	1.4155	1.4172	1.4091
78-85-3	1.4155	1.4041	1.4195
563-52-0	1.416	1.4204	1.4105
7642-04-8	1.416	1.4293	1.4085
107-40-4	1.416	1.4256	1.4087
2517-43-3	1.416	1.4064	1.367
621-62-5	1.416	1.4153	1.392
111-55-7	1.416	1.4158	1.4359
4439-24-1	1.416	1.4139	1.3721
626-82-4	1.416	1.4253	1.4158
123-05-7	1.416	1.4183	1.4091
638-28-8	1.416	1.4158	1.3895
609-09-6	1.416	1.4318	1.4719
133-13-1	1.4165	1.4273	1.4459
1468-39-9	1.4165	1.4291	1.4476
625-45-6	1.4165	1.4052	1.3842
22483-09-6	1.4165	1.408	1.3654
557-40-4	1.4165	1.4262	1.4327
75-34-3	1.4165	1.416	1.3882
124-11-8	1.417	1.4256	1.4118
111-11-5	1.417	1.4215	1.4131
2639-63-6	1.417	1.4253	1.4157
535-13-7	1.417	1.421	1.4184
102-69-2	1.417	1.429	1.3825
930-22-3	1.417	1.4146	1.4175
142-62-1	1.417	1.4298	1.4025
105-56-6	1.417	1.4156	1.4608
2173-56-0	1.417	1.4253	1.4157
814-49-3	1.417	1.4255	1.3748
106-32-1	1.4175	1.4253	1.4157
645-36-3	1.4175	1.4215	1.3748
696-59-3	1.4175	1.4134	1.4033
1120-21-4	1.4175	1.4215	1.3856
609-14-3	1.4175	1.4191	1.4385
623-50-7	1.4175	1.4158	1.3925
110-18-9	1.4175	1.4353	1.3757
2868-37-3	1.4175	1.4172	1.4266
105-34-0	1.418	1.4064	1.4539
107-70-0	1.418	1.4116	1.4064
105-45-3	1.418	1.4087	1.4293
541-16-2	1.418	1.4353	1.4508
16751-59-0	1.418	1.4275	1.376
111-27-3	1.418	1.4172	1.3705
2346-81-8	1.418	1.4158	1.3894
4049-81-4	1.418	1.4277	1.4357
105-30-6	1.418	1.4141	1.3703
141-32-2	1.418	1.4263	1.438
5131-66-8	1.418	1.4198	1.3761
542-08-5	1.418	1.4191	1.4387
111-92-2	1.418	1.4278	1.3795
105-40-8	1.418	1.4171	1.3952
625-23-0	1.418	1.4232	1.3745
638-41-5	1.418	1.4291	1.4228
4485-09-0	1.4185	1.4219	1.4121
5781-53-3	1.4185	1.4258	1.4391
111-26-2	1.4185	1.4256	1.3723
627-03-2	1.4185	1.4158	1.3926
591-95-7	1.419	1.4195	1.4257
106-65-0	1.419	1.4158	1.4355
505-22-6	1.419	1.416	1.389
5332-73-0	1.419	1.4115	1.3635
2211-69-0	1.419	1.4312	1.4101
123-82-0	1.419	1.4275	1.376
7223-38-3	1.419	1.4365	1.4281
111-76-2	1.419	1.4169	1.372
77-74-7	1.419	1.4175	1.3702
97-86-9	1.4195	1.4244	1.4415
141-97-9	1.4195	1.4161	1.4346
124-13-0	1.4195	1.4208	1.4091
1640-89-7	1.4195	1.4239	1.4034
109-49-9	1.4195	1.4215	1.4318
589-55-9	1.4195	1.4202	1.3744
502-56-7	1.4195	1.4219	1.4121
5666-17-1	1.4195	1.4357	1.4074
759-36-4	1.4195	1.4286	1.4484
598-25-4	1.4195	1.4135	1.426
123-25-1	1.4195	1.4258	1.4429
3710-84-7	1.4195	1.4298	1.3638
103-09-3	1.4195	1.4233	1.4157
124-12-9	1.42	1.4223	1.4406
638-29-9	1.42	1.4249	1.4171
35573-93-4	1.42	1.4204	1.3951
1694-31-1	1.42	1.4266	1.4421
544-10-5	1.42	1.4186	1.3893
2163-48-6	1.42	1.4306	1.4484
19398-77-7	1.42	1.4136	1.3828
112-14-1	1.42	1.4253	1.4158
565-60-6	1.42	1.411	1.37
105-48-6	1.42	1.421	1.4183
4606-07-9	1.42	1.4243	1.4325
627-26-9	1.4205	1.4283	1.4501
79-10-7	1.4205	1.4358	1.4107
765-30-0	1.4205	1.4344	1.3801
108-16-7	1.4205	1.4315	1.3692
4536-23-6	1.4205	1.4313	1.4063
142-68-7	1.4205	1.4251	1.3939
624-13-5	1.421	1.4285	1.418
821-55-6	1.421	1.4219	1.4121
925-78-0	1.421	1.4219	1.4121
607-97-6	1.421	1.424	1.4418
123-29-5	1.421	1.4285	1.418
2207-04-7	1.421	1.4348	1.4072
112-58-3	1.421	1.4245	1.3885
592-51-8	1.421	1.4222	1.4571
1001-89-4	1.421	1.4212	1.393
108-32-7	1.421	1.4155	1.4206
2082-59-9	1.421	1.4333	1.4474
5500-21-0	1.4215	1.4174	1.4469
112-15-2	1.4215	1.4164	1.4121
1119-65-9	1.4215	1.431	1.4348
872-05-9	1.4215	1.4293	1.4144
115-19-5	1.4215	1.4418	1.4255
78-79-5	1.4215	1.4145	1.4261
4091-39-8	1.4215	1.4144	1.4108
112-40-3	1.4215	1.4249	1.3878
105-39-5	1.4215	1.4177	1.4131
10203-58-4	1.422	1.4315	1.4507
539-88-8	1.422	1.4218	1.4382
3710-30-3	1.422	1.436	1.4394
540-07-8	1.422	1.4285	1.418
142-29-0	1.422	1.4523	1.4222
34590-94-8	1.422	1.422	1.3771
627-27-0	1.422	1.4233	1.3884
7065-46-5	1.422	1.4301	1.4214
3452-09-3	1.422	1.432	1.4423
97-95-0	1.422	1.4141	1.3699
624-45-3	1.422	1.4161	1.4339
919-19-7	1.4225	1.4233	1.3943
638-04-0	1.4225	1.4348	1.4072
544-00-3	1.4225	1.4302	1.3847
367-23-7	1.4225	1.4458	1.5381
108-82-7	1.423	1.4244	1.3811
107-59-5	1.423	1.4292	1.4224
112-49-2	1.423	1.4079	1.3813
120-94-5	1.423	1.4418	1.3971
617-83-4	1.423	1.4281	1.4308
625-38-7	1.423	1.442	1.42
1191-95-3	1.423	1.4122	1.4151
814-78-8	1.423	1.4085	1.4261
133-08-4	1.423	1.4333	1.4506
108-87-2	1.423	1.4338	1.4033
143-13-5	1.423	1.4285	1.4181
628-67-1	1.4235	1.4258	1.4427
2050-60-4	1.4235	1.4326	1.4484
112-73-2	1.4235	1.4237	1.3898
6938-94-9	1.4235	1.4339	1.4527
542-58-5	1.4235	1.4177	1.4127
75-66-1	1.4235	1.4485	1.3672
19329-89-6	1.4235	1.4316	1.4109
1191-99-7	1.4235	1.4455	1.4158
123-42-2	1.4235	1.4299	1.4021
13475-82-6	1.4235	1.4233	1.3878
111-14-8	1.4235	1.4342	1.4064
4730-22-7	1.424	1.4226	1.3779
818-38-2	1.424	1.4295	1.4456
111-70-6	1.424	1.423	1.3744
6378-65-0	1.424	1.4313	1.4202
1522-46-9	1.424	1.4257	1.4448
1809-19-4	1.424	1.4183	1.3679
344-07-0	1.424	1.44	1.5922
626-35-7	1.424	1.4212	1.4298
1116-40-1	1.424	1.4318	1.3892
625-31-0	1.424	1.4264	1.3956
97-88-1	1.424	1.4269	1.4413
77-25-8	1.424	1.4353	1.4505
765-43-5	1.424	1.4177	1.4241
116-09-6	1.424	1.4048	1.3792
99-66-1	1.4245	1.4351	1.4097
1119-40-0	1.4245	1.4214	1.4392
589-75-3	1.4245	1.4313	1.4202
74-96-4	1.4245	1.4235	1.3674
624-16-8	1.4245	1.4258	1.4147
4949-44-4	1.4245	1.4218	1.4383
1942-45-6	1.4245	1.4351	1.4389
15232-76-5	1.4245	1.4351	1.4388
75-09-2	1.4245	1.4093	1.3758
7433-78-5	1.425	1.436	1.4143
124-19-6	1.425	1.4252	1.412
110-38-3	1.425	1.4313	1.4202
75-35-4	1.425	1.4417	1.4178
111-68-2	1.425	1.4302	1.3759
21020-24-6	1.425	1.4312	1.4394
3010-02-4	1.425	1.433	1.4354
600-36-2	1.425	1.4147	1.3741
623-43-8	1.425	1.4254	1.4282
149-57-5	1.425	1.4351	1.4098
616-25-1	1.425	1.4264	1.3954
2243-27-8	1.4255	1.4266	1.4436
623-70-1	1.4255	1.4309	1.4336
110-42-9	1.4255	1.4285	1.418
513-42-8	1.4255	1.4165	1.3881
75-26-3	1.4255	1.427	1.3771
629-50-5	1.4255	1.4277	1.3898
693-54-9	1.4255	1.4258	1.4146
124-17-4	1.4255	1.4244	1.4172
111-77-3	1.4255	1.4097	1.3686
623-71-2	1.4255	1.4242	1.418
110-82-7	1.426	1.4325	1.398
598-01-6	1.426	1.4277	1.3777
629-06-1	1.426	1.4238	1.3927
5459-58-5	1.426	1.4276	1.4699
142-61-0	1.426	1.43	1.4216
928-80-3	1.426	1.4258	1.4146
288-14-2	1.426	1.4254	1.4396
2028-63-9	1.426	1.4311	1.4168
109-78-4	1.426	1.4154	1.4086
75-33-2	1.4265	1.4403	1.3606
1190-39-2	1.4265	1.4352	1.4505
110-13-4	1.4265	1.4164	1.4322
821-95-4	1.4265	1.4323	1.4168
112-17-4	1.4265	1.4313	1.4202
6876-23-9	1.427	1.4348	1.4066
591-60-6	1.427	1.4264	1.4418
2050-92-2	1.427	1.4343	1.3846
107-41-5	1.427	1.4399	1.3714
764-93-2	1.427	1.4352	1.4451
629-64-1	1.427	1.4298	1.3923
565-77-5	1.427	1.419	1.408
563-47-3	1.427	1.4185	1.4096
111-90-0	1.427	1.4166	1.3731
2497-18-9	1.427	1.4386	1.4411
7152-15-0	1.427	1.424	1.4418
288-42-6	1.427	1.4254	1.4405
507-19-7	1.4275	1.437	1.3828
141-28-6	1.4275	1.4326	1.4481
124-07-2	1.4275	1.4377	1.4098
18720-65-5	1.4275	1.4226	1.3777
6963-44-6	1.4275	1.4295	1.4455
4900-30-5	1.4275	1.4392	1.4425
5582-82-1	1.428	1.4277	1.3776
2052-15-5	1.428	1.4302	1.4445
2051-49-2	1.428	1.4382	1.452
690-37-9	1.428	1.4278	1.3777
927-49-1	1.428	1.4291	1.4171
638-25-5	1.428	1.4337	1.4222
623-93-8	1.4285	1.429	1.3807
112-31-2	1.4285	1.4288	1.4147
2809-67-8	1.4285	1.4351	1.4387
111-51-3	1.4285	1.4412	1.3814
627-93-0	1.4285	1.4258	1.4425
4798-44-1	1.4285	1.432	1.4009
112-25-4	1.4285	1.4269	1.3789
629-59-4	1.4285	1.4302	1.3917
627-58-7	1.4285	1.4282	1.4393
590-02-3	1.429	1.4291	1.422
590-90-9	1.429	1.4162	1.3891
102-82-9	1.429	1.437	1.3891
1489-69-6	1.429	1.4146	1.4152
627-90-7	1.429	1.4337	1.4221
624-29-3	1.429	1.4348	1.4072
3073-66-3	1.429	1.4408	1.4105
6346-09-4	1.429	1.4299	1.3809
141-03-7	1.4295	1.4375	1.4526
108-01-0	1.4295	1.4298	1.3632
111-86-4	1.4295	1.4339	1.379
112-12-9	1.4295	1.4291	1.4171
111-87-5	1.4295	1.4276	1.3776
682-30-4	1.43	1.4273	1.3931
821-09-0	1.43	1.4304	1.3952
2004-70-8	1.43	1.4331	1.4264
111-85-3	1.43	1.4279	1.3958
28056-54-4	1.43	1.44	1.4388
4279-22-5	1.43	1.434	1.4003
68-12-2	1.43	1.41	1.3844
597-49-9	1.43	1.4232	1.3737
1975-78-6	1.43	1.4302	1.4463
112-41-4	1.43	1.435	1.419
1540-29-0	1.43	1.4312	1.4473
920-37-6	1.43	1.439	1.4652
2049-80-1	1.4305	1.4421	1.4794
106-19-4	1.4305	1.4375	1.4525
102-76-1	1.4305	1.435	1.4782
765-42-4	1.4305	1.431	1.3937
14620-52-1	1.4305	1.4278	1.3928
2528-61-2	1.431	1.434	1.4247
999-55-3	1.431	1.4395	1.4641
79-41-4	1.431	1.435	1.4203
142-09-6	1.431	1.4339	1.4467
628-68-2	1.431	1.4253	1.4435
2207-03-6	1.431	1.4348	1.4072
693-05-0	1.431	1.4258	1.4239
104-76-7	1.431	1.4251	1.3776
3153-36-4	1.431	1.4291	1.4219
627-45-2	1.4315	1.4146	1.3841
141-04-8	1.4315	1.438	1.4565
1732-08-7	1.4315	1.4295	1.4453
111-74-0	1.4315	1.4416	1.3746
106-33-2	1.4315	1.4358	1.424
2243-98-3	1.4315	1.4379	1.4475
111-82-0	1.432	1.4337	1.4221
693-89-0	1.432	1.449	1.4288
107-19-7	1.432	1.4281	1.4033
102-85-2	1.432	1.4422	1.3767
471-25-0	1.432	1.4548	1.437
123-04-6	1.432	1.4256	1.3956
629-62-9	1.432	1.4324	1.3935
112-05-0	1.432	1.4405	1.4126
112-44-7	1.432	1.4319	1.4171
75-08-1	1.432	1.4399	1.351
496-77-5	1.432	1.4351	1.4094
930-27-8	1.4325	1.4499	1.4541
1708-29-8	1.4325	1.4455	1.4148
112-66-3	1.4325	1.4358	1.424
123-39-7	1.4325	1.4016	1.3712
112-20-9	1.433	1.437	1.3818
1679-47-6	1.433	1.4244	1.4248
1647-16-1	1.433	1.4417	1.4452
626-27-7	1.433	1.4419	1.4559
2244-07-7	1.433	1.4332	1.4488
5205-34-5	1.433	1.4323	1.3833
534-22-5	1.433	1.4499	1.4543
143-08-8	1.433	1.4313	1.3807
629-82-3	1.433	1.4339	1.3958
3153-37-5	1.433	1.4242	1.4175
1678-91-7	1.433	1.4377	1.4069
139-45-7	1.433	1.4417	1.485
2051-31-2	1.433	1.4323	1.3833
3452-97-9	1.433	1.4291	1.3806
57-55-6	1.433	1.4218	1.3506
645-41-0	1.433	1.4378	1.3947
1732-09-8	1.433	1.4326	1.4479
760-67-8	1.433	1.4348	1.4277
625-50-3	1.4335	1.4175	1.3925
2425-74-3	1.4335	1.4297	1.3989
596-75-8	1.4335	1.4426	1.4583
4553-62-2	1.4335	1.4266	1.4952
764-48-7	1.434	1.4224	1.3905
332-77-4	1.434	1.4408	1.4334
1942-46-7	1.434	1.441	1.4449
78-69-3	1.434	1.4324	1.3833
2473-01-0	1.434	1.4314	1.3985
143-16-8	1.434	1.4389	1.3889
598-78-7	1.434	1.4416	1.4051
2437-56-1	1.434	1.4372	1.421
1498-51-7	1.434	1.4431	1.3847
328-74-5	1.434	1.4287	1.5991
594-45-6	1.434	1.4291	1.3558
598-09-4	1.434	1.4322	1.4096
1577-22-6	1.4345	1.4491	1.4325
285-67-6	1.4345	1.4369	1.4217
544-76-3	1.4345	1.4344	1.3952
106-92-3	1.4345	1.429	1.4325
1120-64-5	1.4345	1.4317	1.4203
100-79-8	1.4345	1.4432	1.4024
111-64-8	1.4345	1.4372	1.4277
5837-78-5	1.4345	1.4311	1.4372
1731-88-0	1.4345	1.4358	1.424
105-99-7	1.4345	1.4411	1.4564
765-03-7	1.4345	1.4402	1.4498
106-94-5	1.4345	1.4315	1.3755
112-54-9	1.435	1.4344	1.4192
106-21-8	1.435	1.4302	1.3833
110-27-0	1.435	1.4394	1.4294
103-11-7	1.435	1.4373	1.4491
10143-60-9	1.435	1.4312	1.3957
624-65-7	1.435	1.4288	1.4294
5911-08-0	1.435	1.429	1.4076
931-56-6	1.435	1.4326	1.404
100-36-7	1.435	1.4459	1.3744
3779-29-1	1.435	1.4496	1.4789
625-69-4	1.435	1.4319	1.3659
1565-81-7	1.435	1.4323	1.3833
75-18-3	1.435	1.4447	1.3506
150-77-6	1.435	1.4453	1.3861
109-02-4	1.4355	1.4521	1.3982
544-13-8	1.4355	1.4239	1.4891
1574-41-0	1.4355	1.4331	1.4264
96-05-9	1.4355	1.4385	1.4683
1528-30-9	1.4355	1.4367	1.4285
2437-25-4	1.4355	1.4357	1.451
111-45-5	1.4355	1.4292	1.397
2919-23-5	1.4355	1.4285	1.385
105-31-7	1.4355	1.4418	1.4306
2207-01-4	1.436	1.4348	1.4066
3741-00-2	1.436	1.436	1.4132
3179-63-3	1.436	1.435	1.3683
2855-19-8	1.436	1.4366	1.4191
1732-10-1	1.436	1.4352	1.4502
1576-95-0	1.4365	1.4427	1.395
4341-76-8	1.4365	1.4383	1.4634
78-77-3	1.4365	1.4331	1.3818
111-18-2	1.4365	1.4453	1.3862
1187-58-2	1.4365	1.4175	1.3921
60-01-5	1.4365	1.446	1.4907
120-92-3	1.4365	1.4298	1.4226
110-40-7	1.4365	1.4411	1.4564
3742-34-5	1.4365	1.4422	1.4337
1653-30-1	1.4365	1.435	1.3857
543-75-9	1.437	1.4591	1.4175
638-10-8	1.437	1.4311	1.4375
1002-69-3	1.437	1.4343	1.4009
1120-36-1	1.437	1.4392	1.4229
3391-86-4	1.437	1.4396	1.4086
124-10-7	1.437	1.4376	1.4258
6622-76-0	1.437	1.4262	1.4327
96-48-0	1.437	1.4207	1.4162
621-77-2	1.437	1.4422	1.3947
112-30-1	1.437	1.4344	1.3834
626-67-5	1.437	1.4565	1.4016
1071-73-4	1.4375	1.424	1.3956
372-18-9	1.4375	1.4677	1.5213
928-95-0	1.4375	1.4461	1.4006
10486-19-8	1.4375	1.4367	1.4214
107-03-9	1.4375	1.445	1.3596
127-19-5	1.438	1.4135	1.3921
151-18-8	1.438	1.4301	1.4142
5891-21-4	1.438	1.4249	1.4157
55-18-5	1.438	1.4164	1.3974
688-84-6	1.438	1.4369	1.4512
623-66-5	1.438	1.4447	1.4594
692-86-4	1.438	1.4431	1.4533
127-00-4	1.438	1.4233	1.3729
924-50-5	1.438	1.4262	1.4331
142-91-6	1.438	1.442	1.4324
637-64-9	1.438	1.434	1.4371
695-06-7	1.438	1.4306	1.4308
2516-34-9	1.438	1.4409	1.3887
542-76-7	1.438	1.418	1.433
110-75-8	1.438	1.4236	1.4112
5765-44-6	1.4385	1.439	1.4503
109-83-1	1.4385	1.4276	1.3544
1501-27-5	1.4385	1.4413	1.4346
1759-53-1	1.4385	1.4495	1.4177
7132-64-1	1.4385	1.4393	1.4275
4170-24-5	1.4385	1.4457	1.4119
625-80-9	1.4385	1.4492	1.3752
77-89-4	1.4385	1.4513	1.5212
111-69-3	1.4385	1.4301	1.4949
2409-52-1	1.4385	1.4389	1.4765
685-91-6	1.4385	1.4266	1.403
2032-35-1	1.4385	1.4386	1.3931
110-72-5	1.439	1.4437	1.3647
13360-61-7	1.439	1.4409	1.4248
103-75-3	1.439	1.4589	1.4362
111-81-9	1.439	1.4414	1.4512
78-87-5	1.439	1.4244	1.3942
1678-98-4	1.439	1.4409	1.4132
1551-21-9	1.439	1.4477	1.3662
7307-55-3	1.439	1.4416	1.3866
629-60-7	1.439	1.4379	1.4531
1921-70-6	1.439	1.4343	1.4001
513-81-5	1.439	1.417	1.4307
592-90-5	1.4395	1.4455	1.3988
3208-16-0	1.4395	1.4527	1.4606
504-63-2	1.4395	1.4272	1.3499
143-22-6	1.4395	1.4323	1.3857
513-44-0	1.4395	1.4445	1.366
109-65-9	1.44	1.4369	1.3818
623-91-6	1.44	1.4474	1.4739
110-93-0	1.44	1.4359	1.4394
21964-44-3	1.44	1.4423	1.4117
107-88-0	1.44	1.43	1.3591
6975-99-1	1.44	1.4451	1.4498
545-06-2	1.44	1.4857	1.4745
10203-28-8	1.44	1.4374	1.3879
624-89-5	1.44	1.4488	1.3595
112-42-5	1.4405	1.437	1.3857
5166-53-0	1.4405	1.4333	1.4359
928-94-9	1.4405	1.4461	1.4006
109-56-8	1.4405	1.4353	1.3679
100-74-3	1.4405	1.4541	1.4029
124-02-7	1.4405	1.454	1.4337
622-45-7	1.4405	1.4475	1.4397
107-82-4	1.4405	1.4376	1.3867
2396-63-6	1.4405	1.4511	1.4949
110-73-6	1.4405	1.4342	1.362
112-13-0	1.441	1.4421	1.4329
105-21-5	1.441	1.4352	1.4355
1678-93-9	1.441	1.4433	1.4131
110-87-2	1.441	1.4641	1.4231
3018-12-0	1.441	1.446	1.45
1114-51-8	1.441	1.4311	1.4069
927-74-2	1.441	1.4364	1.4154
629-73-2	1.441	1.4424	1.4265
1656-48-0	1.441	1.4291	1.4967
6222-35-1	1.441	1.4495	1.4428
629-63-0	1.441	1.4398	1.455
1118-84-9	1.441	1.4376	1.4688
591-47-9	1.441	1.4641	1.4332
109-43-3	1.441	1.4463	1.4632
625-86-5	1.441	1.4568	1.4608
928-96-1	1.441	1.4461	1.4014
627-91-8	1.441	1.4442	1.4386
141-05-9	1.441	1.4474	1.4739
3234-28-4	1.441	1.4406	1.4231
107-81-3	1.441	1.4376	1.3867
1540-34-7	1.4415	1.4195	1.4366
646-20-8	1.4415	1.4348	1.4995
2146-38-5	1.4415	1.4515	1.4333
696-29-7	1.4415	1.4381	1.41
2568-33-4	1.442	1.4396	1.3654
33467-76-4	1.442	1.4487	1.4049
111-06-8	1.442	1.4443	1.4339
104-78-9	1.442	1.4481	1.3779
77-93-0	1.442	1.4572	1.4855
3030-47-5	1.442	1.4566	1.3854
4454-05-1	1.442	1.4576	1.4316
773-82-0	1.442	1.4383	1.64
624-48-6	1.442	1.4423	1.4661
872-53-7	1.442	1.4371	1.429
1654-86-0	1.442	1.4443	1.4339
556-82-1	1.442	1.437	1.3948
540-36-3	1.442	1.4677	1.5211
762-21-0	1.442	1.4537	1.5049
765-13-9	1.442	1.4453	1.4559
628-16-0	1.442	1.4484	1.4893
507-36-8	1.442	1.441	1.3869
109-81-9	1.442	1.4393	1.3576
628-20-6	1.4425	1.4262	1.4409
3721-95-7	1.4425	1.4527	1.4247
96-29-7	1.4425	1.4263	1.3925
112-52-7	1.4425	1.4388	1.4053
6920-22-5	1.4425	1.4399	1.3706
352-93-2	1.4425	1.4516	1.3659
123-75-1	1.4425	1.4423	1.3877
621-70-5	1.4425	1.4514	1.5001
4455-26-9	1.4425	1.4448	1.3979
109-79-5	1.443	1.4485	1.3658
4254-02-8	1.443	1.4399	1.4605
6765-39-5	1.443	1.4437	1.4282
1120-48-5	1.443	1.4452	1.3962
367-11-3	1.443	1.4677	1.521
116-54-1	1.443	1.4385	1.428
621-64-7	1.443	1.4279	1.4063
623-39-2	1.4435	1.4287	1.3612
1830-54-2	1.4435	1.4318	1.4707
1190-22-3	1.4435	1.4304	1.3996
623-46-1	1.4435	1.4294	1.4018
6069-98-3	1.4435	1.4385	1.4128
140-80-7	1.4435	1.4492	1.3834
600-00-0	1.444	1.4537	1.4239
5390-04-5	1.444	1.4418	1.4237
1809-10-5	1.444	1.4376	1.3865
2163-42-0	1.444	1.43	1.3589
4292-92-6	1.444	1.4454	1.4156
13529-27-6	1.444	1.4512	1.4754
557-93-7	1.444	1.4515	1.4055
4630-82-4	1.444	1.4475	1.4394
625-48-9	1.444	1.4241	1.38
110-53-2	1.444	1.441	1.3865
111-75-1	1.4445	1.4424	1.3723
104-50-7	1.4445	1.4387	1.4393
616-21-7	1.4445	1.4304	1.3997
541-31-1	1.4445	1.4475	1.3705
629-74-3	1.4445	1.4466	1.4577
35794-11-7	1.4445	1.455	1.4053
112-16-3	1.4445	1.4456	1.4372
24800-44-0	1.4445	1.4474	1.383
141-79-7	1.4445	1.4271	1.4314
622-93-5	1.4445	1.442	1.3761
629-40-3	1.4445	1.4384	1.5033
5452-75-5	1.4445	1.4512	1.4457
766-09-6	1.4445	1.4579	1.4056
112-88-9	1.445	1.445	1.4299
592-55-2	1.445	1.4355	1.3831
1005-67-0	1.445	1.4569	1.4102
3128-06-1	1.445	1.4429	1.4327
291-64-5	1.445	1.4503	1.402
3877-15-4	1.445	1.4516	1.3656
5292-43-3	1.445	1.4537	1.4236
4110-50-3	1.445	1.4537	1.3711
77-94-1	1.445	1.4602	1.496
589-92-4	1.445	1.4468	1.434
768-66-1	1.445	1.4626	1.412
23783-42-8	1.445	1.4287	1.3839
3377-86-4	1.445	1.4411	1.3906
873-94-9	1.4455	1.4511	1.4418
98-15-7	1.4455	1.4691	1.5636
7320-37-8	1.4455	1.4437	1.4267
7252-83-7	1.4455	1.4307	1.3847
156-60-5	1.4455	1.4662	1.4164
67-66-3	1.4455	1.4487	1.4023
6728-26-3	1.4455	1.437	1.4316
25354-97-6	1.446	1.4497	1.4273
695-12-5	1.446	1.4549	1.4374
2623-23-6	1.446	1.4476	1.4507
110-63-4	1.446	1.4345	1.3586
626-88-0	1.446	1.4411	1.3906
535-11-5	1.446	1.4487	1.4198
106-58-1	1.4465	1.4771	1.4047
871-84-1	1.4465	1.4531	1.4993
111-12-6	1.4465	1.4469	1.4747
103-23-1	1.4465	1.4476	1.4692
105-75-9	1.4465	1.4532	1.4839
3377-87-5	1.4465	1.4411	1.3906
626-58-4	1.4465	1.4571	1.4009
111-46-6	1.4465	1.4329	1.3613
627-30-5	1.4465	1.4279	1.3723
624-44-2	1.4465	1.4374	1.4072
3178-22-1	1.4465	1.4433	1.4128
110-83-8	1.4465	1.4681	1.4276
6482-24-2	1.447	1.4301	1.3773
111-25-1	1.447	1.4441	1.3905
110-66-7	1.447	1.451	1.3707
627-11-2	1.447	1.4425	1.4279
4124-88-3	1.447	1.4623	1.4434
2425-54-9	1.447	1.4423	1.4091
497-03-0	1.447	1.4263	1.4252
4292-75-5	1.447	1.4471	1.418
98-56-6	1.447	1.4691	1.5638
762-42-5	1.447	1.4501	1.4969
628-29-5	1.447	1.4537	1.3706
2979-19-3	1.447	1.4523	1.4381
14436-32-9	1.447	1.4557	1.4461
25414-22-6	1.4475	1.4472	1.4558
617-54-9	1.4475	1.4411	1.47
2935-44-6	1.4475	1.4365	1.3703
1871-96-1	1.4475	1.4437	1.5094
142-28-9	1.4475	1.4284	1.3934
533-68-6	1.4475	1.4508	1.4236
591-12-8	1.4475	1.4611	1.4546
1187-03-7	1.4475	1.4517	1.415
5617-41-4	1.448	1.4486	1.4202
75-12-7	1.448	1.3982	1.3452
13019-22-2	1.448	1.4468	1.4142
10321-71-8	1.448	1.4564	1.4327
1195-42-2	1.448	1.4575	1.412
2816-57-1	1.448	1.4462	1.438
565-62-8	1.4485	1.4271	1.4307
638-46-0	1.4485	1.4553	1.3746
140-82-9	1.4485	1.4433	1.3803
538-23-8	1.4485	1.4546	1.5084
615-83-8	1.449	1.4525	1.4269
503-60-6	1.449	1.4364	1.4148
609-12-1	1.449	1.4498	1.4268
156-59-2	1.449	1.4662	1.4164
2450-71-7	1.449	1.4435	1.4072
628-11-5	1.449	1.4459	1.4331
111-47-7	1.449	1.4553	1.3748
344-04-7	1.4495	1.4687	1.5936
103-24-2	1.4495	1.4498	1.4733
1192-37-6	1.4495	1.4519	1.4332
14073-97-3	1.4495	1.4477	1.4446
106-91-2	1.4495	1.4412	1.468
1003-03-8	1.4495	1.4531	1.3949
4860-03-1	1.4495	1.445	1.4125
111-31-9	1.45	1.4529	1.3746
2396-65-8	1.45	1.4547	1.503
112-43-6	1.45	1.4485	1.4167
6802-75-1	1.45	1.4448	1.4792
453-20-3	1.45	1.436	1.3863
104-67-6	1.45	1.4459	1.4481
111-62-6	1.45	1.4546	1.4653
6168-72-5	1.45	1.4351	1.3536
629-04-9	1.45	1.4465	1.394
506-96-7	1.45	1.4453	1.3986
1937-62-8	1.4505	1.4539	1.4637
591-49-1	1.4505	1.4629	1.4329
122-62-3	1.4505	1.4504	1.4747
627-00-9	1.4505	1.4499	1.4111
515-84-4	1.4505	1.4693	1.4535
1795-15-9	1.451	1.4499	1.4222
1741-83-9	1.451	1.4553	1.3746
107-47-1	1.451	1.4575	1.3815
632-22-4	1.451	1.4437	1.4012
108-94-1	1.451	1.4476	1.4286
111-29-5	1.451	1.4396	1.3651
94-96-2	1.451	1.4429	1.3777
10519-33-2	1.451	1.4447	1.4455
4549-74-0	1.4515	1.4329	1.4304
1639-09-4	1.4515	1.4545	1.378
111-01-3	1.4515	1.444	1.4155
112-67-4	1.4515	1.4504	1.4444
868-77-9	1.4515	1.4424	1.4335
108-56-5	1.4515	1.4644	1.4744
29943-42-8	1.452	1.4417	1.424
123-54-6	1.452	1.4086	1.4276
286-20-4	1.452	1.4547	1.4276
3196-15-4	1.452	1.4487	1.4197
2223-82-7	1.452	1.4575	1.5127
1795-16-0	1.452	1.452	1.426
930-28-9	1.452	1.4419	1.4125
2548-87-0	1.452	1.4436	1.4396
3279-26-3	1.452	1.4645	1.3774
2883-02-5	1.452	1.451	1.4241
112-62-9	1.452	1.4539	1.4637
638-07-3	1.452	1.4404	1.4532
539-74-2	1.4525	1.452	1.4194
6261-22-9	1.4525	1.4527	1.4238
94-65-5	1.4525	1.4511	1.4413
685-87-0	1.4525	1.4607	1.4596
544-40-1	1.4525	1.4576	1.3811
1189-08-8	1.4525	1.4511	1.5149
97-99-4	1.4525	1.4413	1.3943
822-06-0	1.4525	1.4556	1.5061
2425-79-8	1.453	1.4435	1.4472
611-10-9	1.453	1.4497	1.4711
928-51-8	1.453	1.4342	1.379
79-44-7	1.453	1.4401	1.4076
1123-00-8	1.453	1.4629	1.4351
18829-56-6	1.453	1.4459	1.4428
3400-45-1	1.453	1.4622	1.4301
628-89-7	1.453	1.4328	1.3812
5259-98-3	1.4535	1.4387	1.3846
111-83-1	1.4535	1.4485	1.3968
96-41-3	1.4535	1.4434	1.3917
764-01-2	1.4535	1.4497	1.4148
3967-54-2	1.454	1.4465	1.4347
110-56-5	1.454	1.4339	1.3991
18479-51-1	1.454	1.4505	1.4141
10147-36-1	1.454	1.4349	1.3836
19653-33-9	1.454	1.4676	1.4474
594-44-5	1.454	1.4294	1.3775
110-91-8	1.454	1.4548	1.39
38460-95-6	1.454	1.4551	1.4662
111-88-6	1.454	1.4557	1.381
927-68-4	1.454	1.4498	1.4145
1002-28-4	1.4545	1.4549	1.43
97-90-5	1.4545	1.4505	1.5101
141-43-5	1.4545	1.4332	1.3407
693-58-3	1.4545	1.4501	1.3995
3352-87-2	1.4545	1.449	1.4278
1119-46-6	1.455	1.4523	1.4165
21282-97-3	1.455	1.4496	1.5108
629-30-1	1.455	1.4461	1.3742
13057-17-5	1.4555	1.4225	1.3693
7731-29-5	1.4555	1.4568	1.4029
10229-10-4	1.4555	1.4527	1.4234
872-10-6	1.4555	1.4591	1.386
1795-17-1	1.456	1.4536	1.4294
1572-52-7	1.456	1.4456	1.5253
7540-51-4	1.456	1.4482	1.414
88-16-4	1.456	1.4691	1.5632
112-27-6	1.456	1.4402	1.3731
4795-29-3	1.456	1.4505	1.3965
505-32-8	1.456	1.4527	1.4333
2386-60-9	1.456	1.439	1.3881
598-99-2	1.456	1.4696	1.4489
112-29-8	1.456	1.4515	1.4019
628-76-2	1.4565	1.438	1.4038
100-60-7	1.4565	1.4583	1.4045
2969-81-5	1.4565	1.4538	1.4232
15111-56-5	1.4565	1.4734	1.4735
143-10-2	1.457	1.4576	1.386
6006-33-3	1.457	1.4543	1.431
105-86-2	1.457	1.4608	1.4799
107-15-3	1.457	1.4478	1.3463
140-77-2	1.457	1.4634	1.4388
96-32-2	1.457	1.4468	1.4081
470-82-6	1.4575	1.4531	1.444
542-28-9	1.4575	1.4417	1.4233
693-67-4	1.4575	1.4527	1.404
111-44-4	1.4575	1.4327	1.4007
101-43-9	1.458	1.4618	1.4766
368-77-4	1.458	1.4676	1.6113
5332-52-5	1.458	1.4583	1.3882
109-76-2	1.458	1.4516	1.3605
6294-31-1	1.458	1.4603	1.3902
2163-00-0	1.458	1.4413	1.4075
623-51-8	1.458	1.4611	1.3984
3637-61-4	1.458	1.447	1.3979
2455-24-5	1.458	1.451	1.4746
3395-91-3	1.4585	1.4498	1.4142
462-94-2	1.4585	1.4559	1.3686
292-64-8	1.4585	1.4524	1.4056
628-92-2	1.4585	1.4832	1.4325
680-31-9	1.4585	1.4633	1.3654
23144-52-7	1.459	1.447	1.3957
112-55-0	1.459	1.4589	1.3903
16957-70-3	1.459	1.4551	1.4318
25542-62-5	1.459	1.4563	1.4294
108-91-8	1.459	1.467	1.4002
2162-99-4	1.459	1.446	1.4137
14660-52-7	1.459	1.4552	1.4264
3066-71-5	1.459	1.4649	1.4736
143-15-7	1.459	1.4537	1.4062
2358-84-1	1.459	1.4518	1.5155
1118-71-4	1.459	1.4368	1.4489
112-60-7	1.4595	1.4442	1.3808
517-23-7	1.4595	1.4446	1.4617
1126-09-6	1.4595	1.4682	1.4413
434-45-7	1.4595	1.4569	1.5798
156-87-6	1.46	1.4403	1.3525
7731-28-4	1.46	1.4568	1.4029
1445-73-4	1.46	1.471	1.4323
151-13-3	1.46	1.4631	1.4686
765-09-3	1.46	1.4545	1.4081
629-65-2	1.46	1.4611	1.394
10487-71-5	1.46	1.4538	1.4411
2162-98-3	1.4605	1.4492	1.4186
2216-52-6	1.4605	1.4548	1.4132
143-28-2	1.4605	1.4594	1.43
112-71-0	1.4605	1.4553	1.4099
141-12-8	1.4605	1.4586	1.4822
918-00-3	1.4605	1.473	1.4471
1122-60-7	1.4605	1.459	1.4338
79-36-7	1.4605	1.4694	1.4417
109-16-0	1.461	1.4527	1.52
6493-77-2	1.461	1.4741	1.4698
78-88-6	1.461	1.4462	1.4238
4897-84-1	1.461	1.452	1.419
112-26-5	1.461	1.4388	1.4097
112-63-0	1.4615	1.4651	1.495
13325-10-5	1.4615	1.4449	1.3605
502-42-1	1.4615	1.4642	1.433
7300-34-7	1.4615	1.4576	1.3868
2690-08-6	1.4615	1.4618	1.3974
2079-95-0	1.4615	1.4599	1.3939
107-86-8	1.462	1.4263	1.4249
4635-59-0	1.462	1.4478	1.431
629-72-1	1.462	1.456	1.4116
87-13-8	1.462	1.4466	1.4799
623-17-6	1.462	1.4657	1.4983
34885-03-5	1.4625	1.4581	1.407
102-79-4	1.4625	1.4644	1.3797
3218-02-8	1.4625	1.467	1.4044
542-18-7	1.4625	1.4563	1.4173
542-90-5	1.463	1.4792	1.4213
4246-51-9	1.463	1.4562	1.3874
502-44-3	1.463	1.4606	1.4297
2935-90-2	1.463	1.4611	1.3981
1119-51-3	1.4635	1.4609	1.4167
771-62-0	1.4635	1.4792	1.5773
1633-83-6	1.4635	1.4575	1.3967
5162-44-7	1.4635	1.4598	1.4113
5655-61-8	1.4635	1.4664	1.4811
455-19-6	1.464	1.4644	1.5795
100-49-2	1.464	1.4604	1.4026
109-96-6	1.464	1.49	1.4162
100-40-3	1.464	1.4842	1.468
1575-61-7	1.464	1.4503	1.4356
701-97-3	1.464	1.4727	1.442
5454-83-1	1.464	1.4538	1.4229
150-86-7	1.4645	1.4547	1.4332
507-09-5	1.4645	1.4628	1.3809
13532-18-8	1.4655	1.4644	1.4029
2365-48-2	1.4655	1.46	1.3916
79-43-6	1.4655	1.4756	1.4197
760-23-6	1.4655	1.4508	1.4299
109-01-3	1.4655	1.4838	1.3988
4442-79-9	1.4655	1.4612	1.4066
26116-12-1	1.466	1.4751	1.4072
111-49-9	1.466	1.4761	1.3998
80-26-2	1.466	1.4689	1.4814
462-06-6	1.4665	1.4921	1.5041
1772-25-4	1.467	1.4544	1.5695
372-48-5	1.4675	1.4845	1.5005
1121-37-5	1.4675	1.455	1.4637
329-01-1	1.468	1.4762	1.6127
106-95-6	1.468	1.4584	1.4043
556-64-9	1.4685	1.4821	1.4108
123-98-8	1.4685	1.4644	1.4801
543-20-4	1.4685	1.4623	1.4631
999-21-3	1.4685	1.4772	1.5412
111-19-3	1.4685	1.4647	1.4824
7154-73-6	1.4685	1.4798	1.4032
352-32-9	1.469	1.4924	1.5099
122-32-7	1.4695	1.4728	1.6397
493-02-7	1.4695	1.4756	1.4428
60-33-3	1.4695	1.4771	1.4933
352-70-5	1.4695	1.4924	1.5099
10152-76-8	1.47	1.4755	1.3952
872-50-4	1.47	1.4579	1.4259
36768-62-4	1.47	1.4845	1.4133
106-86-5	1.47	1.4737	1.468
10061-01-5	1.47	1.4664	1.4235
2719-27-9	1.47	1.47	1.4535
3088-41-3	1.47	1.4773	1.4718
121-46-0	1.4705	1.5327	1.4916
301-00-8	1.4705	1.4769	1.5263
79-00-5	1.471	1.4519	1.4085
123-35-3	1.471	1.4558	1.4755
616-02-4	1.471	1.48	1.4867
5452-35-7	1.4715	1.4807	1.4038
293-96-9	1.4715	1.4553	1.4117
141-22-0	1.4715	1.4739	1.4623
628-41-1	1.472	1.51	1.4567
100-50-5	1.472	1.4838	1.464
56-81-5	1.472	1.4662	1.3505
98-46-4	1.472	1.4714	1.5795
694-48-4	1.472	1.4883	1.4591
5989-27-5	1.4725	1.4734	1.4746
2873-74-7	1.4725	1.463	1.4675
2955-88-6	1.4725	1.4735	1.4011
401-78-5	1.473	1.4957	1.5649
115-96-8	1.473	1.4642	1.4175
3290-92-4	1.473	1.4674	1.5894
105-83-9	1.473	1.4744	1.3788
402-43-7	1.473	1.4957	1.5649
5989-54-8	1.473	1.4734	1.4746
4221-98-1	1.473	1.4824	1.4746
547-65-9	1.473	1.4469	1.4537
95-52-3	1.4735	1.4924	1.5097
142-26-7	1.4735	1.4505	1.3922
1121-92-2	1.4735	1.475	1.4037
2680-03-7	1.474	1.4407	1.4278
10061-02-6	1.4745	1.4664	1.4235
123-84-2	1.4745	1.4706	1.3697
694-28-0	1.475	1.4576	1.4432
106-25-2	1.475	1.4681	1.4449
4131-74-2	1.475	1.4725	1.4457
870-23-5	1.475	1.4736	1.3877
623-68-7	1.475	1.4738	1.5032
2213-43-6	1.476	1.4955	1.3982
1072-43-1	1.476	1.4887	1.3858
106-24-1	1.476	1.4681	1.4449
15625-89-5	1.476	1.4739	1.5842
930-36-9	1.4765	1.4872	1.4516
99-86-5	1.477	1.4817	1.4747
502-41-0	1.477	1.4745	1.4018
764-13-6	1.477	1.4454	1.4387
872-93-5	1.477	1.4465	1.4004
123-00-2	1.477	1.4851	1.408
463-40-1	1.477	1.4901	1.5246
4318-37-0	1.477	1.4963	1.4029
78-59-1	1.4775	1.475	1.4724
4319-49-7	1.4775	1.4947	1.394
5332-06-9	1.4775	1.4615	1.443
2251-65-2	1.4775	1.4805	1.5987
622-40-2	1.478	1.4817	1.4025
77-77-0	1.478	1.4527	1.4274
1338-43-8	1.478	1.4867	1.5041
13444-24-1	1.478	1.4798	1.4053
4884-24-6	1.478	1.4687	1.4742
67-68-5	1.4785	1.4307	1.3495
5414-21-1	1.4785	1.4623	1.4485
6117-80-2	1.4785	1.4775	1.3875
617-90-3	1.4785	1.4819	1.5166
562-74-3	1.479	1.4816	1.4438
541-91-3	1.479	1.4642	1.4572
7148-74-5	1.479	1.4756	1.4281
3040-44-6	1.4795	1.4833	1.4052
1128-08-1	1.4795	1.463	1.4781
3048-64-4	1.48	1.5013	1.5015
532-34-3	1.48	1.4774	1.5143
2417-90-5	1.48	1.4604	1.4355
4784-77-4	1.48	1.4728	1.4113
617-92-5	1.48	1.4906	1.4612
98-16-8	1.4805	1.4796	1.5455
618-42-8	1.4805	1.4705	1.4356
19686-73-8	1.481	1.4631	1.3747
96-24-2	1.481	1.461	1.3726
4771-80-6	1.481	1.5087	1.4646
930-30-3	1.481	1.4719	1.4507
320-60-5	1.481	1.4925	1.5822
493-01-6	1.481	1.4756	1.4428
123-02-4	1.4815	1.4837	1.5251
56-18-8	1.4815	1.479	1.3751
5452-37-9	1.4815	1.4791	1.4073
140-25-0	1.482	1.4878	1.5574
1459-10-5	1.482	1.4828	1.5267
630-20-6	1.482	1.4846	1.4304
123-01-3	1.4825	1.4846	1.5234
392-83-6	1.4825	1.4957	1.5645
6742-54-7	1.4825	1.4857	1.5216
1081-77-2	1.483	1.4883	1.5178
122-73-6	1.483	1.4887	1.512
1696-20-4	1.483	1.4678	1.4326
1070-78-6	1.483	1.4822	1.4348
2591-86-8	1.4835	1.4761	1.4311
96-23-1	1.4835	1.4571	1.3936
4292-19-7	1.4835	1.4783	1.4078
455-14-1	1.4835	1.4796	1.5455
822-87-7	1.484	1.4704	1.4481
119-60-8	1.484	1.4819	1.4821
111-40-0	1.484	1.4826	1.3663
96-18-4	1.484	1.4542	1.4137
101-83-7	1.484	1.4894	1.4496
2189-60-8	1.4845	1.4899	1.5158
104-72-3	1.4845	1.4869	1.5198
616-23-9	1.4845	1.4571	1.3938
2961-47-9	1.485	1.4833	1.5169
1078-71-3	1.4855	1.4918	1.5135
111-41-1	1.4855	1.4756	1.3641
2049-94-7	1.486	1.4937	1.5085
2050-77-3	1.486	1.48	1.4037
89-82-7	1.486	1.4681	1.475
1007-26-7	1.486	1.4963	1.5085
117-81-7	1.4865	1.4853	1.5974
538-93-2	1.4865	1.4966	1.5057
1077-16-3	1.4865	1.494	1.5111
98-00-0	1.4865	1.4889	1.4536
109-70-6	1.4865	1.4635	1.395
607-81-8	1.4865	1.4986	1.5807
822-67-3	1.4865	1.4977	1.4272
4282-42-2	1.487	1.4811	1.4014
6940-78-9	1.487	1.464	1.4005
7399-50-0	1.487	1.4898	1.5072
103-48-0	1.487	1.4978	1.5437
2524-03-0	1.487	1.5104	1.3701
1192-30-9	1.487	1.4715	1.4158
110-77-0	1.487	1.4831	1.3654
96-54-8	1.4875	1.4949	1.4547
611-13-2	1.4875	1.4654	1.493
110-57-6	1.488	1.4665	1.429
506-32-1	1.488	1.5002	1.5591
538-68-1	1.488	1.4966	1.5085
629-27-6	1.488	1.4823	1.3988
5453-80-5	1.488	1.5027	1.4974
95-11-4	1.488	1.5078	1.5291
717-74-8	1.488	1.4861	1.5179
459-60-9	1.488	1.4878	1.5109
140-08-9	1.4885	1.4767	1.417
627-18-9	1.4885	1.4681	1.3742
2758-18-1	1.4885	1.4653	1.4582
586-62-9	1.4885	1.4809	1.4743
456-49-5	1.489	1.4878	1.5109
930-68-7	1.489	1.4854	1.4581
1818-07-1	1.489	1.4877	1.5163
99-62-7	1.489	1.4912	1.5112
90-42-6	1.489	1.4833	1.4795
1476-11-5	1.4895	1.4665	1.429
115-20-8	1.4895	1.492	1.4097
109-98-8	1.4895	1.4797	1.4107
617-89-0	1.49	1.4966	1.456
100-18-5	1.49	1.4912	1.5112
870-63-3	1.49	1.467	1.4163
103-28-6	1.49	1.5007	1.5411
1670-46-8	1.49	1.4494	1.4652
104-51-8	1.49	1.4998	1.5055
110-06-5	1.49	1.5006	1.3846
121-17-5	1.49	1.4943	1.5989
107-04-0	1.49	1.4627	1.388
540-51-2	1.49	1.4684	1.3654
592-88-1	1.49	1.4936	1.4355
99-87-6	1.49	1.4995	1.5056
4282-40-0	1.4905	1.4838	1.396
4253-89-8	1.491	1.5022	1.3789
16219-75-3	1.491	1.5112	1.5012
98-51-1	1.491	1.4989	1.5083
98-82-8	1.491	1.5002	1.5021
83-13-6	1.491	1.501	1.5785
1074-55-1	1.4915	1.5027	1.5056
558-17-8	1.4915	1.4907	1.3857
103-65-1	1.492	1.5037	1.5021
2550-36-9	1.492	1.4834	1.4227
107-96-0	1.492	1.5031	1.3904
76-67-5	1.492	1.4982	1.5826
638-45-9	1.492	1.4857	1.3928
103-37-7	1.492	1.5035	1.541
35182-51-5	1.492	1.4898	1.507
527-53-7	1.492	1.5086	1.5048
1622-32-8	1.492	1.4596	1.3976
629-45-8	1.4925	1.5012	1.3842
98-06-6	1.4925	1.4994	1.5054
622-39-9	1.4925	1.4991	1.5004
1074-43-7	1.4925	1.5027	1.5055
541-28-6	1.4925	1.4845	1.3892
84-74-2	1.4925	1.4981	1.5846
5271-38-5	1.493	1.4861	1.3582
13116-53-5	1.4935	1.4822	1.4342
1569-69-3	1.4935	1.4966	1.403
111-78-4	1.4935	1.5138	1.4665
2021-28-5	1.494	1.5035	1.5409
1436-59-5	1.494	1.499	1.402
2396-84-1	1.494	1.4625	1.4715
122-70-3	1.494	1.5035	1.5409
106-96-7	1.494	1.4756	1.4313
535-77-3	1.494	1.4995	1.5055
1193-18-6	1.494	1.4776	1.4636
939-48-0	1.494	1.5042	1.5384
628-17-1	1.4945	1.4881	1.3892
591-82-2	1.4945	1.5077	1.4339
105-05-5	1.4945	1.5027	1.5055
625-98-9	1.4945	1.5222	1.5247
498-60-2	1.495	1.4761	1.4836
1453-58-3	1.495	1.5014	1.4505
616-47-7	1.495	1.4872	1.4498
3438-46-8	1.495	1.5039	1.4877
141-93-5	1.495	1.5027	1.5054
1075-38-3	1.495	1.4989	1.5082
827-15-6	1.495	1.5146	1.5961
513-38-2	1.495	1.4869	1.3849
352-33-0	1.495	1.5222	1.5247
79-34-5	1.495	1.4762	1.4295
622-96-8	1.495	1.507	1.5021
2049-95-8	1.4955	1.4963	1.5081
111-02-4	1.4955	1.4877	1.604
100-41-4	1.4955	1.5088	1.4979
696-30-0	1.4955	1.4955	1.5001
102-25-0	1.496	1.4988	1.511
620-14-4	1.496	1.507	1.502
321-28-8	1.496	1.4878	1.5106
108-85-0	1.496	1.4856	1.4187
75-27-4	1.496	1.4927	1.4041
106-42-3	1.496	1.5126	1.4981
3978-81-2	1.496	1.4952	1.5038
542-81-4	1.4965	1.4791	1.379
1122-81-2	1.4965	1.4991	1.5001
101-97-3	1.4965	1.5073	1.538
108-38-3	1.4965	1.5126	1.4981
1080-32-6	1.4965	1.4948	1.4981
1126-79-0	1.497	1.4962	1.5063
625-82-1	1.497	1.5061	1.4603
22037-28-1	1.497	1.5264	1.4704
136-60-7	1.497	1.5035	1.5411
3378-72-1	1.497	1.5123	1.51
517-22-6	1.497	1.4999	1.4693
58-95-7	1.497	1.493	1.6064
2373-51-5	1.497	1.4814	1.3719
108-88-3	1.497	1.5155	1.4931
5124-30-1	1.497	1.501	1.5832
108-48-5	1.4975	1.5077	1.4963
637-27-4	1.4975	1.5121	1.5347
629-19-6	1.4975	1.5086	1.3787
19398-53-9	1.4975	1.4834	1.407
103-45-7	1.498	1.5073	1.5379
75-30-9	1.498	1.4902	1.3798
112-24-3	1.498	1.4988	1.377
121-50-6	1.498	1.5035	1.5648
104-90-5	1.498	1.5026	1.5003
140-31-8	1.498	1.5142	1.4051
100-71-0	1.498	1.5038	1.4958
108-75-8	1.498	1.506	1.5005
930-87-0	1.498	1.4947	1.4653
114-91-0	1.498	1.495	1.5014
87-44-5	1.4985	1.4938	1.5171
616-43-3	1.4985	1.5084	1.4535
934-74-7	1.4985	1.5056	1.5054
542-69-8	1.499	1.4911	1.3845
2244-16-8	1.499	1.4841	1.5058
488-10-8	1.499	1.4847	1.5089
4549-32-0	1.499	1.4841	1.4157
6485-40-1	1.499	1.4841	1.5058
1074-17-5	1.499	1.5027	1.5052
627-63-4	1.499	1.4986	1.4935
108-67-8	1.4995	1.5104	1.502
533-18-6	1.4995	1.5153	1.5347
1570-45-2	1.5	1.508	1.5334
108-47-4	1.5	1.5077	1.4958
109-06-8	1.5	1.51	1.4905
1117-71-1	1.5	1.4828	1.4493
18495-30-2	1.5	1.475	1.4338
459-22-3	1.5005	1.5132	1.5767
60-24-2	1.5005	1.4865	1.3489
2315-68-6	1.5005	1.5073	1.5383
123-32-0	1.5005	1.5024	1.4941
122-46-3	1.5005	1.5153	1.5347
71-43-2	1.5005	1.5195	1.4865
103-83-3	1.5005	1.5187	1.5043
527-84-4	1.5005	1.4995	1.5051
3674-13-3	1.501	1.4955	1.44
326-62-5	1.501	1.5132	1.5768
140-39-6	1.501	1.5153	1.5347
96-19-5	1.501	1.4888	1.444
589-93-5	1.501	1.5077	1.4959
348-51-6	1.501	1.5222	1.5245
84-66-2	1.5015	1.5087	1.5763
536-75-4	1.5015	1.5038	1.4955
536-78-7	1.5015	1.5038	1.4956
592-82-5	1.502	1.5118	1.4335
102-97-6	1.502	1.5143	1.5072
1628-89-3	1.502	1.5039	1.4923
122-79-2	1.502	1.5181	1.5309
13674-87-8	1.5025	1.4902	1.4765
140-11-4	1.5025	1.5121	1.5347
4549-31-9	1.5025	1.4857	1.413
443-83-4	1.5025	1.5184	1.5293
6753-98-6	1.503	1.5032	1.5173
614-18-6	1.503	1.508	1.5333
7209-38-3	1.503	1.5155	1.4186
5396-38-3	1.503	1.4957	1.509
934-80-5	1.503	1.5056	1.5052
1758-88-9	1.503	1.5056	1.5051
32161-06-1	1.503	1.4836	1.4667
611-14-3	1.503	1.507	1.5016
1004-66-6	1.503	1.5058	1.5028
4553-07-5	1.5035	1.5181	1.6044
778-28-9	1.5035	1.5078	1.5139
108-89-4	1.504	1.51	1.4902
110-01-0	1.504	1.4995	1.3913
874-41-9	1.504	1.5056	1.5052
95-47-6	1.5045	1.5126	1.4976
109-08-0	1.5045	1.5039	1.4877
625-84-3	1.5045	1.5061	1.4597
2555-49-9	1.5045	1.5035	1.5388
2404-35-5	1.505	1.4966	1.4223
95-63-6	1.505	1.5104	1.5017
538-86-3	1.505	1.5038	1.4989
59-02-9	1.505	1.4997	1.5718
76-01-7	1.505	1.5035	1.4501
591-22-0	1.505	1.5077	1.4955
77-83-8	1.505	1.5179	1.5751
821-10-3	1.5055	1.4775	1.4581
5061-21-2	1.5055	1.49	1.4407
93-89-0	1.5055	1.5121	1.5349
108-99-6	1.5055	1.51	1.4901
107-08-4	1.5055	1.4951	1.379
606-46-2	1.5055	1.5116	1.5099
1613-51-0	1.506	1.5085	1.3972
103-95-7	1.506	1.5007	1.5449
628-30-8	1.506	1.5189	1.4285
6436-90-4	1.506	1.519	1.5424
1502-22-3	1.506	1.505	1.5104
75-62-7	1.506	1.526	1.4272
87-20-7	1.5065	1.5184	1.5443
14062-18-1	1.507	1.5027	1.5416
110-81-6	1.507	1.52	1.3712
101-41-7	1.507	1.5121	1.5344
103-73-1	1.507	1.5038	1.4991
629-03-8	1.507	1.4877	1.4098
103-76-4	1.507	1.5096	1.4031
18031-40-8	1.5075	1.4878	1.5057
599-91-7	1.5075	1.5115	1.5114
1671-75-6	1.5075	1.5004	1.5449
583-61-9	1.5075	1.5077	1.4954
367-25-9	1.5075	1.5138	1.5228
287-27-4	1.508	1.4951	1.3828
2179-60-4	1.508	1.52	1.371
87-24-1	1.508	1.5102	1.5379
768-56-9	1.508	1.5186	1.5361
94-08-6	1.508	1.5102	1.5381
1515-95-3	1.5085	1.5027	1.5028
503-93-5	1.5085	1.511	1.506
87-19-4	1.5085	1.5234	1.5419
626-87-9	1.509	1.4868	1.4065
107-80-2	1.509	1.4894	1.4024
109-97-7	1.509	1.5117	1.4438
583-03-9	1.509	1.5142	1.5086
541-58-2	1.509	1.5235	1.462
1241-94-7	1.5095	1.5282	1.6401
2524-52-9	1.51	1.508	1.5331
110-86-1	1.51	1.5132	1.4825
874-23-7	1.51	1.4611	1.4687
515-46-8	1.51	1.5182	1.5056
403-42-9	1.5105	1.5032	1.5452
607-85-2	1.5105	1.5294	1.5391
116-16-5	1.511	1.5321	1.5052
933-98-2	1.511	1.5056	1.5048
2550-26-7	1.5115	1.5114	1.5365
104-93-8	1.5115	1.5074	1.4988
7755-92-2	1.5115	1.5059	1.4285
1823-91-2	1.5115	1.5225	1.5646
111-24-0	1.512	1.4902	1.4063
582-62-7	1.512	1.5041	1.5398
2052-14-4	1.512	1.5264	1.5417
874-63-5	1.512	1.5058	1.5027
75-03-6	1.5125	1.5008	1.3713
872-55-9	1.5125	1.5238	1.464
542-85-8	1.5125	1.5286	1.4217
638-02-8	1.5125	1.528	1.4642
352-11-4	1.513	1.5145	1.529
5408-86-6	1.513	1.4855	1.4024
557-91-5	1.513	1.4977	1.3924
446-35-5	1.513	1.5009	1.5574
1191-43-1	1.513	1.5053	1.3778
583-58-4	1.513	1.5077	1.4951
22374-89-6	1.5135	1.5226	1.5069
140-75-0	1.5135	1.5292	1.5114
100-84-5	1.5135	1.5074	1.4988
372-20-3	1.514	1.5356	1.5037
5414-19-7	1.514	1.4892	1.4036
613-70-7	1.514	1.5107	1.5357
2459-09-8	1.514	1.5137	1.5287
526-73-8	1.514	1.5104	1.5013
2078-54-8	1.514	1.5121	1.5111
367-12-4	1.5145	1.5356	1.5036
405-99-2	1.5145	1.5117	1.5446
345-35-7	1.5145	1.5145	1.5289
1632-76-4	1.5145	1.5039	1.4869
533-98-2	1.5145	1.4894	1.4023
1009-14-9	1.515	1.5071	1.5396
104-57-4	1.515	1.5228	1.5308
131-11-3	1.515	1.5173	1.5707
10521-91-2	1.5155	1.5172	1.5084
607-90-9	1.5155	1.5327	1.5389
2065-23-8	1.5155	1.5076	1.5353
7148-07-4	1.5155	1.5035	1.4719
1603-79-8	1.516	1.5188	1.5698
122-78-1	1.5165	1.529	1.5274
578-58-5	1.5165	1.5074	1.4986
1667-01-2	1.5165	1.5152	1.5396
93-58-3	1.5165	1.5181	1.5307
622-98-0	1.517	1.5312	1.5171
93-53-8	1.517	1.5175	1.533
2344-70-9	1.517	1.5193	1.5054
611-70-1	1.517	1.5082	1.5366
2495-35-4	1.517	1.5259	1.5688
80-18-2	1.517	1.5245	1.5019
589-08-2	1.517	1.5232	1.5036
456-48-4	1.5175	1.5144	1.5404
100-66-3	1.5175	1.5094	1.4941
583-04-0	1.5175	1.5259	1.5689
501-53-1	1.518	1.5356	1.5503
2179-59-1	1.518	1.5277	1.4093
877-65-6	1.518	1.5194	1.5084
1638-22-8	1.518	1.5257	1.5055
122-35-0	1.518	1.5247	1.5536
78-75-1	1.519	1.4929	1.3976
110-52-1	1.519	1.4934	1.4019
2346-00-1	1.519	1.5242	1.4254
613-29-6	1.519	1.5	1.5167
88-60-8	1.519	1.5221	1.5085
554-14-3	1.5195	1.5339	1.4583
616-44-4	1.5195	1.5339	1.4582
2947-61-7	1.5195	1.53	1.5645
3001-72-7	1.5195	1.5156	1.4661
585-32-0	1.5195	1.5322	1.5033
495-40-9	1.52	1.5114	1.5365
2085-88-3	1.52	1.533	1.5324
93-54-9	1.5205	1.5257	1.502
106-43-4	1.5205	1.5405	1.5131
10340-91-7	1.5205	1.5342	1.5606
5910-87-2	1.521	1.4687	1.4734
3581-87-1	1.521	1.529	1.4551
81-20-9	1.521	1.5361	1.5333
7295-76-3	1.521	1.5039	1.4914
3360-41-6	1.521	1.5227	1.5053
1746-13-0	1.5215	1.5197	1.5334
698-87-3	1.5215	1.5257	1.5024
104-52-9	1.5215	1.5208	1.5203
140-67-0	1.522	1.517	1.5369
555-57-7	1.522	1.5369	1.5716
109-64-8	1.522	1.4975	1.3967
446-52-6	1.522	1.5144	1.5402
621-87-4	1.522	1.5121	1.534
645-59-0	1.522	1.5265	1.5643
536-50-5	1.522	1.5291	1.5021
118-61-6	1.522	1.5407	1.5356
108-41-8	1.522	1.5405	1.5128
140-29-4	1.5225	1.5352	1.5602
134-62-3	1.5225	1.5171	1.5438
1122-62-9	1.5225	1.5196	1.527
622-08-2	1.5225	1.5241	1.5031
16520-62-0	1.5225	1.5318	1.5663
544-25-2	1.523	1.5655	1.4922
88-18-6	1.5235	1.5252	1.5054
770-12-7	1.5235	1.5524	1.5205
89-72-5	1.5235	1.5223	1.5054
30752-19-3	1.524	1.5234	1.5307
108-90-7	1.524	1.5483	1.5078
289-80-5	1.524	1.506	1.478
770-35-4	1.524	1.5205	1.5032
499-75-2	1.524	1.5253	1.5055
609-72-3	1.5245	1.5218	1.5036
94-30-4	1.5245	1.5063	1.5388
402-67-5	1.525	1.5242	1.5407
530-40-5	1.525	1.5162	1.5401
95-49-8	1.525	1.5405	1.5128
1123-85-9	1.525	1.5257	1.5018
515-40-2	1.525	1.5149	1.5232
151-10-0	1.525	1.5027	1.4998
122-84-9	1.525	1.5102	1.5374
54-11-5	1.525	1.5367	1.5389
3587-60-8	1.5255	1.5221	1.518
827-52-1	1.5255	1.5305	1.5408
4169-04-4	1.5255	1.5205	1.5031
2810-04-0	1.5255	1.525	1.5014
1200-14-2	1.5255	1.5133	1.5397
624-92-0	1.5255	1.5402	1.3595
140-18-1	1.5255	1.5281	1.5531
122-97-4	1.5255	1.5296	1.502
620-22-4	1.5255	1.5393	1.5608
3874-54-2	1.526	1.5111	1.5711
622-61-7	1.526	1.5255	1.5182
96-27-5	1.526	1.517	1.3585
98-01-1	1.526	1.4761	1.4835
618-36-0	1.5265	1.5375	1.4995
93-55-0	1.5265	1.5169	1.5327
5368-81-0	1.5265	1.5107	1.5354
84-80-0	1.527	1.509	1.7001
699-02-5	1.527	1.533	1.5019
2217-07-4	1.527	1.5055	1.5122
1711-07-5	1.527	1.5299	1.561
6780-49-0	1.527	1.5194	1.5359
939-97-9	1.527	1.5128	1.5397
88-69-7	1.527	1.5291	1.5019
1073-06-9	1.527	1.5555	1.5264
15206-55-0	1.527	1.525	1.5663
110-02-1	1.5275	1.5423	1.4503
460-00-4	1.5275	1.5555	1.5262
5337-93-9	1.528	1.5145	1.5364
529-19-1	1.528	1.5393	1.5607
100-47-0	1.529	1.5469	1.5557
1122-54-9	1.529	1.5196	1.5265
943-15-7	1.529	1.5191	1.5397
504-31-4	1.529	1.4886	1.482
772-00-9	1.5295	1.5343	1.5366
1521-51-3	1.5295	1.5208	1.4488
585-74-0	1.5295	1.5203	1.5328
2859-67-8	1.5295	1.526	1.5001
1467-05-6	1.53	1.5239	1.5203
622-24-2	1.53	1.5276	1.5165
2142-73-6	1.53	1.5175	1.5363
94-02-0	1.5305	1.5138	1.5724
1191-08-8	1.5305	1.5162	1.3698
122-60-1	1.5305	1.5239	1.5335
577-16-2	1.531	1.5203	1.5326
98-02-2	1.531	1.5306	1.4599
104-47-2	1.531	1.5243	1.5655
936-58-3	1.531	1.5392	1.5363
1746-11-8	1.531	1.5407	1.5323
620-02-0	1.531	1.479	1.4906
403-43-0	1.531	1.5299	1.561
527-69-5	1.532	1.4992	1.5062
814-67-5	1.532	1.5192	1.3648
1493-27-2	1.532	1.5242	1.5405
64-04-0	1.5325	1.5418	1.4993
60-12-8	1.5325	1.5384	1.4977
24544-04-5	1.533	1.5151	1.5117
109-09-1	1.533	1.5445	1.5047
579-07-7	1.533	1.5306	1.5648
22717-57-3	1.533	1.544	1.5353
626-60-8	1.533	1.5445	1.5047
1195-32-0	1.533	1.5176	1.5356
103-80-0	1.533	1.5419	1.5486
98-86-2	1.5335	1.524	1.5285
1126-78-9	1.5335	1.5174	1.5066
93-15-2	1.5335	1.511	1.5405
606-45-1	1.5335	1.5107	1.5352
3972-65-4	1.5335	1.5386	1.5248
350-03-8	1.534	1.5196	1.5264
104-82-5	1.534	1.5312	1.5167
620-19-9	1.534	1.5312	1.5166
1072-85-1	1.534	1.5555	1.526
104-84-7	1.5345	1.5455	1.4993
89-74-7	1.5345	1.5175	1.5362
96-09-3	1.535	1.539	1.528
614-68-6	1.535	1.5445	1.5622
612-22-6	1.535	1.5326	1.533
4313-03-5	1.535	1.4691	1.466
2845-89-8	1.535	1.5336	1.514
28788-62-7	1.535	1.5235	1.5583
19819-98-8	1.5355	1.533	1.5015
1864-92-2	1.5355	1.5048	1.5129
623-12-1	1.536	1.5336	1.5139
100-81-2	1.536	1.5455	1.4992
1122-82-3	1.536	1.5486	1.4703
1121-60-4	1.536	1.535	1.5212
2706-56-1	1.536	1.5384	1.4974
586-61-8	1.536	1.5436	1.5219
93-51-6	1.5365	1.5393	1.4992
119-36-8	1.5365	1.5508	1.5317
90-00-6	1.5365	1.5424	1.4978
30273-11-1	1.5365	1.5255	1.5064
452-71-1	1.5365	1.5333	1.5109
393-52-2	1.537	1.5299	1.5607
1817-47-6	1.537	1.5218	1.5367
629-20-9	1.537	1.5943	1.5275
496-11-7	1.5375	1.5523	1.5306
31252-42-3	1.5375	1.5456	1.5423
55-81-2	1.5375	1.5306	1.5041
103-74-2	1.5375	1.5348	1.4956
122-99-6	1.538	1.5318	1.499
769-92-6	1.538	1.5283	1.5064
288-47-1	1.5385	1.5369	1.4453
768-52-5	1.5385	1.5197	1.5034
98-83-9	1.5385	1.5206	1.5321
100-44-7	1.5385	1.5365	1.5123
371-40-4	1.539	1.5401	1.5054
768-49-0	1.5395	1.5241	1.5357
13258-63-4	1.5395	1.5384	1.4973
108-39-4	1.54	1.5549	1.493
2051-53-8	1.54	1.5284	1.5064
620-23-5	1.54	1.5329	1.5288
109-80-8	1.54	1.5243	1.3643
97-53-0	1.54	1.5434	1.5373
100-80-1	1.5405	1.5287	1.532
586-37-8	1.5405	1.5153	1.5338
100-51-6	1.5405	1.5502	1.4927
20893-30-5	1.541	1.5536	1.5259
6267-24-9	1.541	1.5433	1.3846
119-64-2	1.541	1.554	1.5342
91-66-7	1.5415	1.5134	1.5072
74-95-3	1.5415	1.5118	1.381
932-16-1	1.5415	1.5054	1.4967
348-54-9	1.5415	1.5401	1.5055
89-58-7	1.542	1.5361	1.5329
552-45-4	1.542	1.5312	1.5163
142-83-6	1.542	1.4694	1.461
622-80-0	1.5425	1.5232	1.5032
766-90-5	1.5425	1.5361	1.5321
610-67-3	1.5425	1.5269	1.5344
104-63-2	1.543	1.5482	1.5036
3849-33-0	1.543	1.5311	1.4911
5676-58-4	1.543	1.5458	1.5654
1529-41-5	1.543	1.5565	1.5797
1984-65-2	1.543	1.554	1.5335
513-31-5	1.543	1.5196	1.427
622-97-9	1.543	1.5287	1.5322
488-98-2	1.5435	1.5479	1.5677
10500-57-9	1.5435	1.5514	1.5325
611-15-4	1.5435	1.5287	1.532
100-46-9	1.5435	1.5534	1.4946
6971-51-3	1.5435	1.5355	1.4988
3391-10-4	1.5435	1.5546	1.5173
1585-07-5	1.5435	1.5574	1.5184
872-85-5	1.544	1.535	1.5207
586-98-1	1.544	1.5466	1.49
89-93-0	1.544	1.5455	1.4988
83-41-0	1.544	1.5361	1.5327
124-48-1	1.544	1.5351	1.4061
100-55-0	1.5445	1.5466	1.4899
766-51-8	1.5445	1.5336	1.5135
493-05-0	1.545	1.5583	1.5314
3840-31-1	1.545	1.518	1.5079
1745-81-9	1.545	1.5565	1.5325
1201-38-3	1.545	1.509	1.5383
100-52-7	1.5455	1.5392	1.5236
95-73-8	1.5455	1.5614	1.5322
15014-25-2	1.5455	1.5625	1.7107
456-41-7	1.5455	1.5433	1.5305
637-59-2	1.5455	1.5441	1.5215
626-62-0	1.5455	1.5319	1.4214
372-19-0	1.5455	1.5401	1.5054
88-72-2	1.546	1.542	1.5288
104-87-0	1.546	1.5329	1.529
938-45-4	1.546	1.5412	1.5371
541-73-1	1.546	1.5716	1.528
120-20-7	1.546	1.5225	1.508
100-42-5	1.5465	1.5337	1.5279
99-97-8	1.5465	1.5218	1.5035
102-27-2	1.5465	1.5265	1.5032
579-66-8	1.5465	1.5318	1.5073
19398-61-9	1.547	1.5614	1.532
6940-76-7	1.547	1.5191	1.3982
99-08-1	1.547	1.542	1.5289
2175-91-9	1.547	1.5107	1.4974
95-75-0	1.547	1.5614	1.532
2393-23-9	1.547	1.5388	1.5003
94-68-8	1.547	1.5265	1.5031
5798-75-4	1.5475	1.5538	1.5547
96-43-5	1.5475	1.5716	1.4726
529-20-4	1.5475	1.5329	1.5285
598-21-0	1.5475	1.5241	1.4222
10193-99-4	1.548	1.554	1.5285
612-16-8	1.5485	1.5355	1.4986
824-94-2	1.5485	1.5255	1.5177
6850-57-3	1.549	1.5388	1.5002
496-16-2	1.549	1.557	1.5272
610-99-1	1.549	1.547	1.5336
1711-06-4	1.549	1.5455	1.5485
1973-22-4	1.549	1.5574	1.5181
95-21-6	1.549	1.5533	1.5612
536-74-3	1.549	1.5523	1.5582
556-96-7	1.5495	1.561	1.5183
873-66-5	1.5495	1.5361	1.5321
2524-64-3	1.55	1.5888	1.6423
493-09-4	1.55	1.5634	1.5287
100-69-6	1.55	1.5296	1.5256
99-02-5	1.55	1.5455	1.5481
89-87-2	1.5505	1.5361	1.5328
118-69-4	1.5505	1.5614	1.5318
1121-55-7	1.5505	1.5296	1.5253
3731-52-0	1.551	1.5502	1.4918
88-05-1	1.551	1.5428	1.5028
3731-53-1	1.551	1.5502	1.4919
121-72-2	1.551	1.5218	1.5033
588-96-5	1.551	1.5505	1.5194
583-70-0	1.551	1.561	1.5181
98-87-3	1.551	1.5495	1.5322
553-94-6	1.551	1.561	1.5181
96-21-9	1.5515	1.5264	1.3971
95-50-1	1.5515	1.5716	1.5277
32768-54-0	1.5515	1.5614	1.5317
100-43-6	1.5515	1.5296	1.5253
2216-94-6	1.552	1.5384	1.6028
98-95-3	1.552	1.5499	1.5238
24549-06-2	1.552	1.5395	1.5027
6640-27-3	1.552	1.5769	1.5131
96-12-8	1.5525	1.5156	1.4168
576-83-0	1.5525	1.5536	1.5213
98-88-4	1.5525	1.553	1.5444
591-31-1	1.5525	1.5265	1.5298
91-88-3	1.553	1.5314	1.5098
150-19-6	1.553	1.5462	1.4942
591-17-3	1.553	1.5705	1.5143
17176-77-1	1.5535	1.5588	1.6285
93-03-8	1.5535	1.5254	1.5036
874-60-2	1.554	1.5455	1.5486
556-56-9	1.554	1.525	1.4082
504-78-9	1.554	1.5415	1.3864
[truncated: 254 more rows]

## Sheet: Table S7
Table S7. Experimental and predicted values of the refractive index for maleic acid and its ozonolysis products
index = index of the compound for use in Figure 6
Cappa = Values calculated using the Cappa et al. method [J. Geophys. Res.: Atmospheres, 2011, Vol. 116, D15204]
QSPR = Predicted values using the Redmond & Thompson model
GC = Values calculated using the Cai et al. Group Contribution method [Env. Sci. Technol. 2017, 51 (17), pp 9683–9690]
GF = Values calculated using the GF model
CASRN	index	Cappa	QSPR	GC	GF
Formic acid	1	1.51	1.32	1.364	1.3689
Glyoxal	2	1.57	1.38	1.411	1.3785
Glyoxal hydrate	3	1.54	1.38	1.441	1.3785
Glyoxylic acid	4	1.57	1.39	1.453	1.4243
Glyoxylic acid hydrate	5	1.51	1.37	1.462	1.4243
2-oxopropanoic acid	6	1.54	1.4	1.44	1.4261
3-oxopropanoic acid	7	1.54	1.4	1.449	1.4342
2_3-dioxopropanoic acid	8	1.61	1.44	1.497	1.4571
1-hydroxy-2-oxoethyl-2-oxoacetate	9	1.57	1.45	1.477	1.4573
3-hydroperoxy-2-oxopropanoic acid	10	1.55	1.42	1.432	1.4675
3-(formyloxy)-3-hyoxypropanoic acid	11	1.53	1.42	1.443	1.4689
2-formyloxy-2-hydroxyacetic acid	12	1.57	1.45	1.499	1.4692
Oxalic acid	13	1.57	1.4	1.497	1.4744
2-hydroxy-2-(2-oxoacetoxy)acetic acid	14	1.57	1.46	1.481	1.4872
2-(1-hydroxy-2-oxoethoxy)-2-oxoacetic acid	15	1.57	1.46	1.481	1.4872
2-oxosuccinic acid	16	1.57	1.45	1.505	1.4917
2-oxomalonic acid	17	1.61	1.45	1.527	1.4977
1-hydroxy-2-oxoethyl 2_2-dihydroxyacetate	18	1.54	1.43	1.466	1.5003
Oxirane-2_3-dicarboxylic acid	19	1.57	1.45	1.494	1.504
3_3-dihydroxy-2-oxopropanoic acid	20	1.55	1.42	1.487	1.5152
Maleic acid	21	1.57	1.45	1.646	1.521
2-(2_2-dihydroxyacetoxy)-2-hydroxyacetic acid	22	1.54	1.43	1.478	1.532
2-oxo-2-(1_2_2-trihydroxyethoxy)acetic acid	23	1.54	1.43	1.478	1.532
2_2_3-trihydroxysuccinic acid	24	1.54	1.43	1.572	1.5903
Dihydroxytartaric acid	25	1.51	1.4	1.624	1.6426

## Sheet: Table S8
Table S8. Experimental and predicted values of the refractive index for potential components of organic aerosols [Env. Sci. Technol. 2017, 51 (17), pp 9683–9690]
Exp. = experimental values from Cai et al. Supporting Information [Env. Sci. Technol. 2017, 51 (17), pp 9683–9690]
GF = Values calculated using the GF model
QSPR = Values calculated using the QSPR model of Redmond & Thompson
GC = Values calculated using the Group Contribution method of Cai et al.
CASRN	Exp.	GF	QSPR	GC
Glycine	1.663	1.4593	1.373	1.493
Alanine	1.62	1.4554	1.385	1.563
Valine	1.579	1.455	1.399	1.579
Threonine	1.618	1.4882	1.3934	1.57
Lysine	1.558	1.4918	1.4052	1.547
Arginine	1.637	1.5358	1.4397	1.546
D-(+)-Raffinose	1.532	1.5929	1.4978	1.552
D-(+)-Trehalose	1.552	1.587	1.4531	1.552
Maltose	1.547	1.587	1.4531	1.547
Lactose	1.598	1.587	1.4531	1.561
Sucrose	1.546	1.5833	1.4532	1.546
Sorbitol	1.525	1.5402	1.3715	1.531
D-Mannitol	1.565	1.5402	1.3715	1.531
Glucose	1.535	1.5309	1.403	1.535
D-Fructose	1.531	1.5303	1.4027	1.527
Galactose	1.588	1.5309	1.403	1.557
Xylose	1.561	1.5121	1.3976	1.524
Oxalic acid	1.516	1.4744	1.3975	1.506
Malonic acid	1.461	1.4727	1.4121	1.486
Succinic acid	1.492	1.4716	1.4215	1.476
Methylmalonic acid	1.481	1.4664	1.4218	1.557
Glutaric acid	1.465	1.4709	1.4282	1.471
Methylsuccinic acid	1.477	1.4666	1.4285	1.535
Adipic acid	1.505	1.4704	1.4334	1.467
2_2-dimethylsuccinic acid	1.488	1.4702	1.4336	1.491
2-methylglutaric acid	1.486	1.4667	1.4336	1.52
3-methylglutaric acid	1.481	1.4667	1.4336	1.52
Pimelic acid	1.491	1.47	1.4376	1.464
2_2-dimethylglutaric acid	1.487	1.4699	1.4378	1.485
3_3-dimethylglutaric acid	1.49	1.4699	1.4378	1.485
3-methyladipic acid	1.486	1.4667	1.4377	1.509
Diethylmalonic acid	1.485	1.4699	1.4378	1.485
Tartaric acid	1.496	1.5413	1.4219	1.558
Citric acid	1.505	1.5444	1.4653	1.505
PEG3	1.455	1.4402	1.3733	1.455
PEG4	1.458	1.4442	1.381	1.455
Erythritol	1.521	1.4993	1.3595	1.505
Carbitol	1.427	1.4166	1.3732	1.411
